# Supplementary material for: Global patterns and trends of suicide mortality and years of life lost among adolescents and young adults from 1990 to 2021: a systematic analysis for the Global Burden of Disease Study 2021
Source: PubMed Central journal article supplement (PMC11561676; doi:10.1017/s2045796024000532), 2024-10-21
Supplement: S2045796024000532sup001.pdf [file S2045796024000532sup001.pdf]

## Content

|                                                                                                                                                                                  |    |
|----------------------------------------------------------------------------------------------------------------------------------------------------------------------------------|----|
| Method S1. GBD 2021 methods for suicide mortality estimation .....                                                                                                               | 3  |
| Method S2. Age, period, and cohort analysis of suicide mortality.....                                                                                                            | 6  |
| Table S1. The mortality and death cases from suicide among whole population between WHO estimates in 2021 and GBD estimates in 2021 .....                                        | 8  |
| Table S2. The rate of suicide mortality and their AAPC from 1990 to 2021 in 204 regions.....                                                                                     | 9  |
| Table S3. The rate of YLLs of suicide and their AAPC from 1990 to 2021 in 204 regions....                                                                                        | 20 |
| Table S4. The trends in rate of suicide mortality in 204 countries by Joinpoint regression....                                                                                   | 31 |
| Table S5. The trends in rate of suicide YLLs in 204 countries by Joinpoint regression .....                                                                                      | 54 |
| Table S6. Wald $\chi^2$ test of suicide mortality in age, period, and cohort models in global and 5 SDI regions.....                                                             | 76 |
| Figure S1. Joinpoint regression analysis of mortality from suicide in different sexes from 1990 to 2021 .....                                                                    | 79 |
| Figure S2. Joinpoint regression analysis of rate of YLLs from suicide in different sexes from 1990 to 2021 .....                                                                 | 80 |
| Figure S3. Joinpoint regression analysis of mortality from suicide in different age groups from 1990 to 2021 .....                                                               | 81 |
| Figure S4. Joinpoint regression analysis of rate of YLLs from suicide in different age groups from 1990 to 2021 .....                                                            | 82 |
| Figure S5. Joinpoint regression analysis of rate of suicide YLLs aged 10–24 years in global and 5 SDI regions from 1990 to 2021 .....                                            | 83 |
| Figure S6. Joinpoint regression analysis of mortality from suicide in 21 regions from 1990 to 2021 .....                                                                         | 84 |
| Figure S7. Joinpoint regression analysis of rate of YLLs from suicide in 21 regions from 1990 to 2021 .....                                                                      | 85 |
| Figure S8. Joinpoint regression analysis of mortality from suicide among males and females in global and different regions, 1990-2021.....                                       | 86 |
| Figure S9. Joinpoint regression analysis of rate of YLLs from suicide among males and females in global and different regions, 1990-2021 .....                                   | 86 |
| Figure S10. Joinpoint regression analysis of mortality from suicide among different age groups in global and different regions, 1990-2021 .....                                  | 87 |
| Figure S11. Joinpoint regression analysis of rate of YLLs from suicide among different age groups in global and different regions, 1990-2021.....                                | 88 |
| Figure S12. Global map of death cases from suicide in 2021 .....                                                                                                                 | 89 |
| Figure S13. Global map of YLLs from suicide in 2021 .....                                                                                                                        | 90 |
| Figure S14. Global map of rate of YLLs from suicide in 2021 .....                                                                                                                | 91 |
| Figure S15. Global map of AAPC in rate of YLLs from suicide from 1990 to 2021.....                                                                                               | 92 |
| Figure S16. Trends for rate of YLLs of suicide among 21 regions by SDI for males (A), females (B), and both sexes (C) in 10-24 years population combined from 1990 to 2021 ..... | 93 |
| Figure S17. Trends for mortality of suicide among 204 countries by SDI for both sexes in 10-24 years population in 2021 .....                                                    | 94 |
| Figure S18. Trends for rate of YLLs of suicide among 204 countries by SDI for both sexes in                                                                                      |    |

|                                                                                                   |     |
|---------------------------------------------------------------------------------------------------|-----|
| 10-24 years population in 2021 .....                                                              | 95  |
| Figure S19. The trends in suicide mortality in 21 regions, 1990-2021 .....                        | 96  |
| Figure S20. The age effects of suicide mortality in 21 regions, 1990-2021 .....                   | 97  |
| Figure S21. The period effects of suicide mortality in 21 regions, 1990-2021 .....                | 98  |
| Figure S22. The cohort effects of suicide mortality in 21 regions, 1990-2021 .....                | 99  |
| Figure S23. The trends in suicide mortality in low SDI countries, 1990-2021 .....                 | 100 |
| Figure S24. The trends in suicide mortality in low-middle SDI countries, 1990-2021 .....          | 101 |
| Figure S25. The trends in suicide mortality in middle SDI countries, 1990-2021 .....              | 102 |
| Figure S26. The trends in suicide mortality in high-middle SDI countries, 1990-2021 .....         | 103 |
| Figure S27. The trends in suicide mortality in high SDI countries, 1990-2021 .....                | 104 |
| Figure S28. The age effects of suicide mortality in low SDI countries, 1990-2021 .....            | 105 |
| Figure S29. The age effects of suicide mortality in low-middle SDI countries, 1990-2021 ..        | 106 |
| Figure S30. The age effects of suicide mortality in middle SDI countries, 1990-2021 .....         | 107 |
| Figure S31. The age effects of suicide mortality in high-middle SDI countries, 1990-2021 ..       | 108 |
| Figure S32. The age effects of suicide mortality in high SDI countries, 1990-2021 .....           | 109 |
| Figure S33. The period effects of suicide mortality in low SDI countries, 1990-2021 .....         | 110 |
| Figure S34. The period effects of suicide mortality in low-middle SDI countries, 1990-2021 .....  | 111 |
| Figure S35. The period effects of suicide mortality in middle SDI countries, 1990-2021 .....      | 112 |
| Figure S36. The period effects of suicide mortality in high-middle SDI countries, 1990-2021 ..... | 113 |
| Figure S37. The period effects of suicide mortality in high SDI countries, 1990-2021 .....        | 114 |
| Figure S38. The cohort effects of suicide mortality in low SDI countries, 1990-2021 .....         | 115 |
| Figure S39. The cohort effects of suicide mortality in low-middle SDI countries, 1990-2021 .....  | 116 |
| Figure S40. The cohort effects of suicide mortality in middle SDI countries, 1990-2021 .....      | 117 |
| Figure S41. The cohort effects of suicide mortality in high-middle SDI countries, 1990-2021 ..... | 118 |
| Figure S42. The cohort effects of suicide mortality in high SDI countries, 1990-2021 .....        | 119 |

## **Method S1. GBD 2021 methods for suicide mortality estimation**

The Global Burden of Disease Study (GBD 2021) study estimated mortality due to 371 causes by age, sex, and location between 1990 and 2021 for 204 countries and territories, the detailed methods for which are available in the GBD 2021 cause of death capstone paper.(GBD 2021 Diseases and Injuries Collaborators, 2024) In GBD 2021, suicide was defined following the International Classification of Diseases (ICD) as death caused by purposely self-inflicted poisoning or injury (ICD-10 codes X60-X64.9, X66-X84.9, Y87.0; ICD-9 codes E950-E959); deaths from unintentional drug overdoses are not included in this definition. For this analysis, we present results for suicide as an aggregate cause of death.

### **Suicide mortality data sources**

A detailed description of the data sources for the cause of death database can be found in the appendix to GBD 2016 cause of death capstone paper.(GBD 2016 Causes of Death Collaborators, 2017) These sources include vital registration systems and verbal autopsy reports.

### **Addressing bias in input data**

Variation in data quality was addressed through a series of methods that include data standardisation and the redistribution of inappropriately coded deaths or “garbage codes” that are not possible causes of death, or that are not specific underlying causes of death but have been entered as the underlying cause of death on death certificates. Undercounting or miss-assignment of deaths from suicide is a known problem in suicide death estimation, and the level and type of miss-assignment differs by location, age, and sex. Correction of miss-assignment is accounted for in GBD in part by reassignment from ICD codes that may include suicide deaths, such as undetermined intent injury codes (Y10-Y34 in ICD-10 and E980-E988 in ICD-9) or exposure to unspecified factor (X59 in ICD-10; E887 in ICD-9), some intermediate causes of death that cannot be specific underlying causes of death (eg septicemia or peritonitis), or as poorly defined or unknown causes of mortality (R99). For distribution of intermediate causes, we used a regression between suicide fractions and intermediate causes by age and sex in each location for each cause of injury. The same regressions were implemented for homicide and

unintentional injuries. Based on scale up betas from these three regressions to one, we redistributed deaths coded to indeterminate causes to suicide, homicide, and unintentional injury. Redistribution of garbage codes is explained in the GBD 2016 cause of death capstone paper.(GBD 2016 Causes of Death Collaborators, 2017)

### **Suicide mortality estimation**

Mortality from suicide was estimated using the cause of death ensemble model (CODEm) developed for the GBD study. Ensemble modelling is a method where a large number of model specifications are systematically tested and reviewed based on their out-of-sample predictive validity; models that perform best are subsequently incorporated into a weighted ensemble model with the highest weights assigned to models with the best out-of sample prediction error. The model for suicide was age-limited such that deaths from self-harm are restricted to a lower limit of age 10 years, due to the difficulty of determining intent for deaths at younger ages.

CODEm models estimate the individual cause-level mortality without taking into account the all-cause mortality. GBD uses the CodCorrect algorithm to ensure that all individual causes add up to the all-cause mortality. After generating underlying cause of death estimates and accompanying uncertainty, this algorithm combines these models into estimates that are consistent with the levels of all-cause mortality estimated for each age-sex-year-location group. Using 1000 draws from the posterior distribution of each cause and 1000 draws from the posterior distribution of the estimation of all-cause mortality, CoDCorrect rescales the sum of cause specific estimates to equal the draws from the all cause distribution.

The approach to cause of death estimation for injuries, including suicide, was as shown in this flowchart:



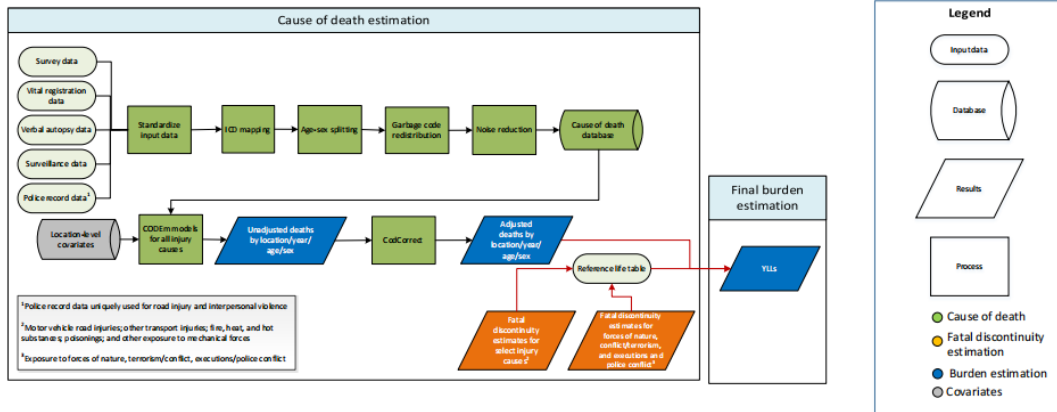

**Method Figure S1. Flowchart for suicide mortality estimation**

## Reference

1. GBD 2016 Causes of Death Collaborators (2017) Global, regional, and national age-sex specific mortality for 264 causes of death, 1980-2016: a systematic analysis for the Global Burden of Disease Study 2016. *Lancet* 390(10100), 1151-1210.
2. GBD 2021 Diseases and Injuries Collaborators (2024) Global incidence, prevalence, years lived with disability (YLDs), disability-adjusted life-years (DALYs), and healthy life expectancy (HALE) for 371 diseases and injuries in 204 countries and territories and 811 subnational locations, 1990-2021: a systematic analysis for the Global Burden of Disease Study 2021. *Lancet* 403(10440), 2133-2161.

## **Method S2. Age, period, and cohort analysis of suicide mortality**

We used the web-based Age, period, and cohort model (<https://analysistools.cancer.gov/apc/>) to analysis the effect of age, period, and cohort on suicide mortality trends across SDI qualities, regions, and countries. Age effect refers to the influence of physiological and social processes on the individual's aging. Period effect is the result of external factors affecting all age groups at a given time. Cohort effect is changes caused by unique experiences in different periods.(Bell, 2020; Yang et al., 2018) These three basic temporal dimensions can provide insight into the epidemiology of the disease and help identify potential gaps in different aspects of the prevention, management and treatment programs for diseases. However, the covariance of these three variables (age = period - birth cohort) leads to a statistical impossibility to estimate the independent effects of age, period and birth cohort.(Bell, 2020; Rosenberg and Anderson, 2011) To avoid this problem, we generate estimable APC parameters and functions without imposing arbitrary constraints on the model.

GBD 2021 estimates for suicide death cases and population data of each country/region were used as data inputs for the age, period, and cohort model. Before formal analysis, a total of 15 countries were excluded because the number of suicide deaths among 10-24 years was less than 1 for several consecutive years (**Method Table S1**). In a typical age, period, and cohort model, the age and period interval must be equal, so ages are divided into 5-year age groups (10-14 years, 15-19 years, and 20-24 years), and periods are divided into 5-year groups (1992-1996, 1997-2001, ..., 2017-2021). Finally, eight partially coincidental birth cohorts are generated by age groups and period groups (1967-1976, 1972-1981, ..., 2022-2011) (**Method Table S2**). Furthermore, in the age, period, and cohort model, the age effect is represented longitudinally by a fit of a given number of birth cohorts adjusted for period bias to a specific age rate. The period/cohort effect is expressed by the period/cohort relative mortality, which is calculated as the rate of age-specific mortality in each period/cohort relative to the reference period/cohort. In our study, we chose 10 years old as the reference age and 1990 as the reference period. The choice of reference did not affect the interpretation of the results.(Rosenberg et al., 2014) Statistical significance of these parameters was tested by the Wald  $\chi^2$ , with a significance level of 0.05. These processes were completed in R 4.2.1.

**Method Table S1. List of countries screened out due to unsatisfactory data quality**

| SDI quintile regions | Country                                                                                 |
|----------------------|-----------------------------------------------------------------------------------------|
| Low SDI              |                                                                                         |
| Low-middle SDI       | Sao Tome and Principe, Tuvalu                                                           |
| Middle SDI           | Grenada, Saint Vincent and the Grenadines, Tokelau                                      |
| High-middle SDI      | Saint Kitts and Nevis, Antigua and Barbuda, Cook Islands,<br>Dominica, Niue, Seychelles |
| High SDI             | Andorra, Bermuda, Monaco, San Marino                                                    |

**Method Table S2. The lexis diagram of suicide data for the age, period, and cohort model**

| Cohort group |       | Period group |           |           |           |           |           |
|--------------|-------|--------------|-----------|-----------|-----------|-----------|-----------|
|              |       | 1992-1996    | 1997-2001 | 2002-2006 | 2007-2011 | 2012-2016 | 2017-2021 |
| Age group    | 10-14 | 1977-1986    | 1982-1991 | 1987-1996 | 1992-2001 | 1997-2006 | 2002-2011 |
|              | 15-19 | 1972-1981    | 1977-1986 | 1982-1991 | 1987-1996 | 1992-2001 | 1997-2006 |
|              | 20-24 | 1967-1976    | 1972-1981 | 1977-1986 | 1982-1991 | 1987-1996 | 1992-2001 |

**Reference**

1. Bell A (2020) Age period cohort analysis: a review of what we should and shouldn't do. *Ann Hum Biol* 47(2), 208-217.
2. Rosenberg PS and Anderson WF (2011) Age-period-cohort models in cancer surveillance research: ready for prime time? *Cancer Epidemiol Biomarkers Prev* 20(7), 1263-1268.
3. Rosenberg PS, Check DP and Anderson WF (2014) A web tool for age-period-cohort analysis of cancer incidence and mortality rates. *Cancer Epidemiol Biomarkers Prev* 23(11), 2296-2302.
4. Yang J, Zhang Y, Luo L, Meng R and Yu C (2018) Global Mortality Burden of Cirrhosis and Liver Cancer Attributable to Injection Drug Use, 1990-2016: An Age-Period-Cohort and Spatial Autocorrelation Analysis. *Int J Environ Res Public Health* 15(1).

**Table S1. The mortality and death cases from suicide among whole population between WHO estimates in 2021 and GBD estimates in 2021**

|                                                                  | WHO estimates in 2021           |                    |                  | GBD estimates in 2021           |                     |                  |
|------------------------------------------------------------------|---------------------------------|--------------------|------------------|---------------------------------|---------------------|------------------|
|                                                                  | Both                            | Male               | Female           | Both                            | Male                | Female           |
| Estimated number of death cases from suicide in whole population | 717,000<br>(590,000 to 892,000) | -                  | -                | 746,379<br>(691,760 to 799,847) | -                   | -                |
| Estimated crude rate of suicide mortality in whole population    | 9.1 (6.9 to 11.6)               | 12.3 (9.6 to 15.4) | 5.9 (4.2 to 7.7) | 9.5 (8.8 to 10.1)               | 13.1 (12.3 to 14.0) | 5.8 (5.1 to 6.5) |

**Reference:**

1. World Health Organization (2024) World health statistics 2024: monitoring health for the SDGs, sustainable development goals. Geneva. <https://www.who.int/publications/i/item/9789240094703> (accessed 21 May 2024).
2. Global Burden of Disease (2024) GBD Results. Washington. <https://vizhub.healthdata.org/gbd-results/> (accessed 16 May 2024).

**Table S2. The rate of suicide mortality and their AAPC from 1990 to 2021 in 204 regions**

|                                  | Cases (n), 1990 | Mortality (per 100,000 population), 1990 | Cases (n), 2021 | Mortality (per 100,000 population), 2021 | AAPC: 1990-2021     | P value | Order     |
|----------------------------------|-----------------|------------------------------------------|-----------------|------------------------------------------|---------------------|---------|-----------|
| <b>Andean Latin America</b>      |                 |                                          |                 |                                          |                     |         |           |
| Bolivia (Plurinational State of) | 132 (101 - 169) | 6.6 (5 - 8.5)                            | 177 (120 - 247) | 5.5 (3.7 - 7.6)                          | -0.6 (-0.7 to -0.5) | <0.001  | 74        |
| Ecuador                          | 193 (180 - 205) | 5.9 (5.5 - 6.3)                          | 469 (389 - 555) | 9.7 (8 - 11.4)                           | 1.2 (-1.3 to 3.8)   | 0.332   | 36        |
| Peru                             | 234 (186 - 286) | 3.3 (2.6 - 4.1)                          | 278 (188 - 370) | 3 (2.1 - 4)                              | -0.3 (-1.5 to 1)    | 0.698   | 152       |
| <b>Australasia</b>               |                 |                                          |                 |                                          |                     |         |           |
| Australia                        | 471 (450 - 493) | 11.9 (11.3 - 12.4)                       | 448 (418 - 475) | 9.5 (8.8 - 10)                           | -0.7 (-1.4 to -0.1) | 0.032   | 38        |
| New Zealand                      | 135 (127 - 141) | 16 (15.1 - 16.8)                         | 108 (100 - 115) | 10.7 (9.9 - 11.3)                        | -1.4 (-2.7 to 0)    | 0.045   | <b>26</b> |
| <b>Caribbean</b>                 |                 |                                          |                 |                                          |                     |         |           |
| Antigua and Barbuda              | 0 (0 - 0)       | 0.9 (0.8 - 1.1)                          | 0 (0 - 0)       | 0.8 (0.6 - 0.9)                          | -0.2 (-1.6 to 1.3)  | 0.784   | 202       |
| Bahamas                          | 1 (1 - 1)       | 1.6 (1.4 - 1.8)                          | 1 (1 - 2)       | 1.4 (1 - 1.9)                            | -0.3 (-0.9 to 0.2)  | 0.183   | 193       |
| Barbados                         | 2 (2 - 2)       | 3.1 (2.7 - 3.4)                          | 1 (1 - 1)       | 1.9 (1.4 - 2.6)                          | -1.2 (-1.7 to -0.6) | <0.001  | 182       |
| Belize                           | 2 (2 - 2)       | 3 (2.7 - 3.4)                            | 4 (3 - 5)       | 2.9 (2.5 - 3.5)                          | 0.3 (-0.1 to 0.7)   | 0.173   | 157       |
| Bermuda                          | 0 (0 - 0)       | 3.4 (3 - 3.8)                            | 0 (0 - 0)       | 1.3 (1.1 - 1.6)                          | -3.3 (-3.8 to -2.7) | <0.001  | 194       |
| Cuba                             | 448 (426 - 469) | 14.4 (13.7 - 15.1)                       | 82 (69 - 94)    | 4.2 (3.5 - 4.8)                          | -3.9 (-5.6 to -2.1) | <0.001  | 110       |
| Dominica                         | 0 (0 - 1)       | 2 (1.6 - 2.5)                            | 0 (0 - 0)       | 2 (1.4 - 2.7)                            | 0 (-0.2 to 0.2)     | 0.751   | 180       |
| Dominican Republic               | 84 (69 - 101)   | 3.5 (2.9 - 4.2)                          | 104 (72 - 139)  | 3.6 (2.5 - 4.9)                          | 0.1 (-0.6 to 0.7)   | 0.844   | 129       |
| Grenada                          | 1 (1 - 1)       | 3.3 (2.8 - 3.8)                          | 0 (0 - 1)       | 1.9 (1.6 - 2.3)                          | -1.8 (-2.3 to -1.2) | <0.001  | 181       |
| Guyana                           | 46 (37 - 54)    | 17.8 (14.1 - 21)                         | 43 (32 - 55)    | 20.3 (15.5 - 26.5)                       | 0.5 (-0.7 to 1.6)   | 0.433   | <b>10</b> |
| Haiti                            | 127 (62 - 178)  | 6.5 (3.2 - 9.2)                          | 186 (99 - 267)  | 5 (2.6 - 7.1)                            | -0.5 (-0.7 to -0.3) | <0.001  | 85        |
| Jamaica                          | 4 (3 - 5)       | 0.5 (0.4 - 0.7)                          | 4 (3 - 5)       | 0.5 (0.4 - 0.7)                          | 0.2 (-1.5 to 1.9)   | 0.809   | 204       |
| Puerto Rico                      | 44 (41 - 48)    | 4.5 (4.1 - 4.9)                          | 13 (10 - 16)    | 2.1 (1.7 - 2.6)                          | -2.6 (-3.3 to -1.9) | <0.001  | 177       |

|                                     |                 |                    |                 |                    |                     |        |           |
|-------------------------------------|-----------------|--------------------|-----------------|--------------------|---------------------|--------|-----------|
| Saint Kitts and Nevis               | 0 (0 - 0)       | 1.8 (1.6 - 2)      | 0 (0 - 0)       | 1.4 (1.1 - 2.1)    | -1.3 (-2.1 to -0.6) | 0.001  | 191       |
| Saint Lucia                         | 2 (1 - 2)       | 3.6 (3.2 - 4)      | 1 (1 - 1)       | 3 (2.4 - 3.8)      | -0.7 (-1.2 to -0.2) | 0.007  | 151       |
| Saint Vincent and the<br>Grenadines | 1 (1 - 1)       | 3 (2.6 - 3.4)      | 1 (1 - 1)       | 2.7 (2.2 - 3.2)    | -0.4 (-1.7 to 0.9)  | 0.529  | 165       |
| Suriname                            | 22 (12 - 26)    | 18.1 (10 - 21.6)   | 22 (18 - 27)    | 15.6 (12.6 - 19.1) | -0.4 (-1.7 to 1)    | 0.569  | <b>14</b> |
| Trinidad and Tobago                 | 43 (40 - 46)    | 12.5 (11.6 - 13.4) | 21 (16 - 27)    | 7.6 (5.7 - 9.8)    | -1.4 (-3 to 0.2)    | 0.08   | 49        |
| United States Virgin Islands        | 1 (1 - 2)       | 4.5 (3.4 - 5.8)    | 1 (1 - 1)       | 6.1 (4.1 - 9.2)    | 1.1 (-0.1 to 2.3)   | 0.081  | 64        |
| <b>Central Europe</b>               |                 |                    |                 |                    |                     |        |           |
| Albania                             | 37 (30 - 44)    | 3.7 (3.1 - 4.5)    | 9 (7 - 12)      | 1.7 (1.2 - 2.2)    | -2.8 (-4 to -1.5)   | <0.001 | 186       |
| Bosnia and Herzegovina              | 110 (93 - 126)  | 9.6 (8.1 - 11)     | 24 (19 - 29)    | 4.3 (3.4 - 5.3)    | -2.7 (-3.9 to -1.5) | <0.001 | 101       |
| Bulgaria                            | 168 (156 - 180) | 9.1 (8.5 - 9.7)    | 47 (39 - 53)    | 4.8 (4 - 5.5)      | -2.4 (-3 to -1.7)   | <0.001 | 91        |
| Croatia                             | 85 (79 - 90)    | 8.2 (7.7 - 8.8)    | 24 (21 - 27)    | 3.7 (3.2 - 4.2)    | -2.4 (-3.3 to -1.5) | <0.001 | 126       |
| Czechia                             | 184 (172 - 195) | 7.7 (7.2 - 8.2)    | 68 (61 - 74)    | 4.3 (3.9 - 4.7)    | -2 (-3.5 to -0.5)   | 0.007  | 102       |
| Hungary                             | 245 (231 - 259) | 10.6 (10 - 11.2)   | 74 (66 - 81)    | 5.1 (4.5 - 5.6)    | -2.6 (-3.6 to -1.5) | <0.001 | 84        |
| Montenegro                          | 13 (11 - 15)    | 8.2 (6.8 - 9.7)    | 6 (5 - 8)       | 5.4 (4.4 - 6.6)    | -1.3 (-4.1 to 1.7)  | 0.398  | 78        |
| North Macedonia                     | 24 (20 - 30)    | 4.8 (3.8 - 5.9)    | 12 (8 - 16)     | 3.1 (2.2 - 4.2)    | -1.3 (-1.7 to -0.9) | <0.001 | 143       |
| Poland                              | 683 (660 - 706) | 8 (7.7 - 8.2)      | 417 (390 - 440) | 7.2 (6.7 - 7.6)    | -0.3 (-1 to 0.4)    | 0.349  | 54        |
| Romania                             | 288 (267 - 311) | 4.9 (4.5 - 5.3)    | 121 (104 - 140) | 3.9 (3.4 - 4.5)    | -0.9 (-2 to 0.2)    | 0.098  | 115       |
| Serbia                              | 233 (187 - 272) | 10.6 (8.5 - 12.4)  | 50 (40 - 61)    | 3.1 (2.5 - 3.8)    | -3.9 (-4.7 to -3)   | <0.001 | 146       |
| Slovakia                            | 84 (72 - 99)    | 6.6 (5.6 - 7.7)    | 35 (29 - 43)    | 4.2 (3.4 - 5.1)    | -1.5 (-2.4 to -0.5) | 0.002  | 107       |
| Slovenia                            | 53 (49 - 56)    | 11.9 (11.2 - 12.7) | 12 (11 - 13)    | 4 (3.6 - 4.5)      | -3.8 (-4.5 to -3.1) | <0.001 | 112       |
| <b>Central Asia</b>                 |                 |                    |                 |                    |                     |        |           |
| Armenia                             | 25 (24 - 27)    | 2.9 (2.7 - 3)      | 13 (12 - 15)    | 2.5 (2.2 - 2.8)    | -0.2 (-1.9 to 1.6)  | 0.849  | 170       |
| Azerbaijan                          | 52 (46 - 64)    | 2.5 (2.2 - 3)      | 40 (30 - 53)    | 1.8 (1.4 - 2.4)    | -0.9 (-2 to 0.1)    | 0.088  | 184       |
| Georgia                             | 49 (45 - 54)    | 3.8 (3.5 - 4.2)    | 27 (24 - 31)    | 4.4 (3.8 - 5)      | 0.6 (-0.4 to 1.7)   | 0.258  | 99        |
| Kazakhstan                          | 608 (559 - 659) | 13.9 (12.8 - 15.1) | 401 (362 - 439) | 9.8 (8.8 - 10.7)   | -1 (-1.6 to -0.4)   | 0.001  | 34        |

|                                    |                 |                    |                    |                   |                     |        |     |
|------------------------------------|-----------------|--------------------|--------------------|-------------------|---------------------|--------|-----|
| Kyrgyzstan                         | 119 (104 - 132) | 9.2 (8.1 - 10.2)   | 106 (87 - 126)     | 6 (4.9 - 7.1)     | -1.3 (-2 to -0.6)   | <0.001 | 66  |
| Mongolia                           | 93 (70 - 117)   | 13.1 (9.9 - 16.5)  | 83 (63 - 98)       | 10.9 (8.2 - 12.8) | -0.6 (-2.2 to 1.1)  | 0.49   | 25  |
| Tajikistan                         | 64 (56 - 75)    | 3.9 (3.4 - 4.5)    | 71 (51 - 110)      | 2.6 (1.8 - 4)     | -1.2 (-1.8 to -0.7) | <0.001 | 169 |
| Turkmenistan                       | 89 (80 - 99)    | 7.8 (7 - 8.6)      | 126 (98 - 160)     | 9.4 (7.4 - 12)    | 0.6 (-0.5 to 1.7)   | 0.276  | 39  |
| Uzbekistan                         | 413 (375 - 451) | 6.5 (5.9 - 7.1)    | 821 (702 - 951)    | 10.3 (8.8 - 11.9) | 1.5 (0.8 to 2.3)    | <0.001 | 31  |
| <b>Central Latin America</b>       |                 |                    |                    |                   |                     |        |     |
| Colombia                           | 454 (423 - 490) | 4.4 (4.1 - 4.8)    | 893 (751 - 1043)   | 7.5 (6.3 - 8.7)   | 1.6 (0.6 to 2.6)    | 0.001  | 51  |
| Costa Rica                         | 42 (38 - 46)    | 4.5 (4.1 - 4.9)    | 84 (76 - 94)       | 7.7 (6.9 - 8.6)   | 1.9 (0.1 to 3.7)    | 0.038  | 46  |
| El Salvador                        | 222 (185 - 256) | 12.5 (10.4 - 14.4) | 135 (104 - 171)    | 7.7 (5.9 - 9.8)   | -2.2 (-3.9 to -0.5) | 0.013  | 47  |
| Guatemala                          | 125 (114 - 137) | 4.7 (4.3 - 5.1)    | 303 (258 - 349)    | 6.1 (5.2 - 7.1)   | 0.5 (-1.2 to 2.3)   | 0.57   | 62  |
| Honduras                           | 72 (59 - 89)    | 4.7 (3.9 - 5.8)    | 88 (55 - 133)      | 2.7 (1.7 - 4.2)   | -1.7 (-1.9 to -1.5) | <0.001 | 162 |
| Mexico                             | 879 (842 - 919) | 3 (2.9 - 3.2)      | 2324 (2137 - 2516) | 7 (6.4 - 7.6)     | 2.8 (2.3 to 3.3)    | <0.001 | 56  |
| Nicaragua                          | 68 (58 - 90)    | 5.2 (4.4 - 6.9)    | 102 (80 - 128)     | 5.4 (4.2 - 6.8)   | 0.1 (-0.6 to 0.7)   | 0.85   | 75  |
| Panama                             | 32 (29 - 35)    | 4.2 (3.8 - 4.6)    | 53 (44 - 63)       | 4.8 (4 - 5.8)     | 0.5 (0 to 0.9)      | 0.041  | 89  |
| Venezuela (Bolivarian Republic of) | 334 (310 - 359) | 5.6 (5.2 - 6)      | 519 (401 - 681)    | 8.8 (6.8 - 11.5)  | 2.1 (1.1 to 3)      | <0.001 | 41  |
| <b>Central Sub-Saharan Africa</b>  |                 |                    |                    |                   |                     |        |     |
| Angola                             | 164 (119 - 221) | 5.1 (3.7 - 6.9)    | 396 (264 - 555)    | 3.8 (2.5 - 5.3)   | -0.9 (-1.8 to 0)    | 0.062  | 124 |
| Central African Republic           | 55 (39 - 74)    | 6.5 (4.6 - 8.8)    | 107 (74 - 154)     | 5.9 (4.1 - 8.5)   | -0.4 (-0.5 to -0.3) | <0.001 | 69  |
| Congo                              | 42 (30 - 58)    | 5.1 (3.7 - 7.1)    | 72 (51 - 101)      | 4.3 (3.1 - 6)     | -0.4 (-1.1 to 0.3)  | 0.279  | 104 |
| Democratic Republic of the Congo   | 519 (379 - 723) | 4.3 (3.2 - 6)      | 1212 (835 - 1881)  | 4.1 (2.8 - 6.3)   | -0.3 (-0.6 to 0.1)  | 0.12   | 111 |
| Equatorial Guinea                  | 8 (5 - 11)      | 5.9 (4 - 8.3)      | 23 (13 - 37)       | 4.3 (2.4 - 6.8)   | -1 (-1.3 to -0.6)   | <0.001 | 105 |
| Gabon                              | 13 (9 - 18)     | 4.3 (3 - 5.9)      | 22 (15 - 33)       | 4 (2.6 - 5.8)     | -0.1 (-0.4 to 0.1)  | 0.208  | 113 |

**East Asia**

|                                       |                       |                   |                    |                 |                     |        |     |
|---------------------------------------|-----------------------|-------------------|--------------------|-----------------|---------------------|--------|-----|
| China                                 | 42202 (27618 - 48504) | 11.7 (7.7 - 13.4) | 6582 (5419 - 8340) | 2.8 (2.3 - 3.6) | -4.5 (-4.8 to -4.1) | <0.001 | 160 |
| Democratic People's Republic of Korea | 404 (271 - 581)       | 7.3 (4.9 - 10.6)  | 265 (184 - 394)    | 4.9 (3.4 - 7.2) | -1.3 (-1.4 to -1.2) | <0.001 | 88  |
| Taiwan (Province of China)            | 238 (225 - 254)       | 4.2 (3.9 - 4.4)   | 188 (171 - 206)    | 5.4 (4.8 - 5.9) | 0.9 (0.2 to 1.6)    | 0.011  | 79  |

**Eastern Europe**

|                     |                    |                    |                    |                   |                     |        |           |
|---------------------|--------------------|--------------------|--------------------|-------------------|---------------------|--------|-----------|
| Belarus             | 198 (184 - 211)    | 9 (8.3 - 9.5)      | 113 (93 - 135)     | 8 (6.5 - 9.5)     | -0.6 (-1.3 to 0)    | 0.057  | 45        |
| Estonia             | 47 (42 - 51)       | 14.3 (13 - 15.6)   | 13 (11 - 15)       | 6.5 (5.5 - 7.3)   | -2.7 (-4.5 to -0.8) | 0.005  | 60        |
| Latvia              | 69 (64 - 73)       | 12.7 (11.9 - 13.5) | 16 (14 - 18)       | 6 (5.2 - 6.6)     | -2.4 (-2.8 to -1.9) | <0.001 | 67        |
| Lithuania           | 97 (92 - 103)      | 11.9 (11.2 - 12.6) | 38 (34 - 42)       | 9.2 (8.2 - 10.2)  | -0.7 (-2.4 to 1.1)  | 0.452  | 40        |
| Republic of Moldova | 83 (77 - 89)       | 8.1 (7.5 - 8.7)    | 30 (26 - 34)       | 5.5 (4.8 - 6.2)   | -1.4 (-2.2 to -0.5) | 0.002  | 73        |
| Russian Federation  | 4566 (4487 - 4641) | 14.5 (14.3 - 14.8) | 2289 (2111 - 2454) | 9.7 (9 - 10.4)    | -1.5 (-2.2 to -0.8) | <0.001 | 35        |
| Ukraine             | 891 (837 - 951)    | 8.2 (7.7 - 8.8)    | 688 (504 - 875)    | 10.5 (7.7 - 13.3) | 0.7 (-0.2 to 1.5)   | 0.11   | <b>27</b> |

**Eastern Sub-Saharan****Africa**

|            |                   |                 |                   |                 |                     |        |     |
|------------|-------------------|-----------------|-------------------|-----------------|---------------------|--------|-----|
| Burundi    | 125 (84 - 184)    | 7.5 (5 - 11)    | 184 (124 - 295)   | 4.3 (2.9 - 6.8) | -1.9 (-2.3 to -1.4) | <0.001 | 106 |
| Comoros    | 6 (2 - 9)         | 3.6 (1.2 - 5.8) | 7 (4 - 10)        | 3.1 (2 - 4.5)   | -1.2 (-6.4 to 4.2)  | 0.647  | 147 |
| Djibouti   | 4 (2 - 6)         | 2.4 (1.4 - 4.3) | 9 (5 - 16)        | 2.6 (1.4 - 4.6) | 0.4 (-0.1 to 0.9)   | 0.089  | 167 |
| Eritrea    | 64 (46 - 86)      | 5.7 (4.1 - 7.6) | 111 (73 - 161)    | 5.3 (3.5 - 7.7) | -0.2 (-0.6 to 0.1)  | 0.233  | 81  |
| Ethiopia   | 1088 (742 - 1345) | 6.8 (4.6 - 8.4) | 1260 (988 - 1536) | 3.3 (2.6 - 4.1) | -2.3 (-2.4 to -2.1) | <0.001 | 139 |
| Kenya      | 225 (180 - 351)   | 2.8 (2.3 - 4.4) | 520 (390 - 786)   | 3 (2.3 - 4.6)   | 0.2 (-0.1 to 0.5)   | 0.162  | 153 |
| Madagascar | 181 (136 - 231)   | 4.7 (3.6 - 6)   | 403 (271 - 561)   | 4.2 (2.8 - 5.8) | -0.4 (-0.5 to -0.3) | <0.001 | 109 |
| Malawi     | 168 (125 - 225)   | 5.3 (4 - 7.1)   | 349 (243 - 485)   | 4.9 (3.4 - 6.8) | -0.2 (-0.6 to 0.2)  | 0.257  | 87  |



|                                     |                    |                     |                    |                    |                     |        |           |
|-------------------------------------|--------------------|---------------------|--------------------|--------------------|---------------------|--------|-----------|
| Mozambique                          | 169 (116 - 224)    | 4.1 (2.8 - 5.4)     | 575 (377 - 835)    | 5.4 (3.6 - 7.9)    | 0.9 (0.7 to 1.1)    | <0.001 | 76        |
| Rwanda                              | 182 (131 - 236)    | 8 (5.8 - 10.4)      | 167 (110 - 246)    | 3.9 (2.6 - 5.7)    | -2.4 (-2.8 to -1.9) | <0.001 | 118       |
| Somalia                             | 89 (52 - 152)      | 3.5 (2 - 6)         | 273 (157 - 459)    | 3.8 (2.2 - 6.3)    | 0.3 (0.1 to 0.5)    | 0.01   | 123       |
| South Sudan                         | 72 (47 - 101)      | 3.6 (2.4 - 5.1)     | 158 (107 - 224)    | 4.6 (3.1 - 6.6)    | 1 (-0.1 to 2.1)     | 0.088  | 95        |
| Uganda                              | 170 (114 - 241)    | 3 (2 - 4.3)         | 554 (393 - 769)    | 3.6 (2.6 - 5.1)    | 0.5 (0.2 to 0.9)    | 0.001  | 127       |
| United Republic of Tanzania         | 348 (264 - 450)    | 4.1 (3.1 - 5.3)     | 591 (409 - 840)    | 3.1 (2.1 - 4.4)    | -0.9 (-1.1 to -0.7) | <0.001 | 148       |
| Zambia                              | 138 (105 - 176)    | 5 (3.8 - 6.3)       | 305 (204 - 446)    | 4.6 (3.1 - 6.8)    | -0.2 (-0.6 to 0.1)  | 0.224  | 96        |
| <b>High-income Asia Pacific</b>     |                    |                     |                    |                    |                     |        |           |
| Brunei Darussalam                   | 3 (2 - 4)          | 3.5 (2.2 - 4.8)     | 2 (1 - 2)          | 1.6 (1.2 - 2)      | -2.7 (-3.5 to -1.9) | <0.001 | 189       |
| Japan                               | 1679 (1645 - 1711) | 6 (5.9 - 6.1)       | 1762 (1728 - 1790) | 10 (9.8 - 10.2)    | 1.8 (0.9 to 2.6)    | <0.001 | 33        |
| Republic of Korea                   | 1257 (1078 - 2194) | 9.6 (8.2 - 16.7)    | 648 (470 - 714)    | 8.4 (6.1 - 9.3)    | -0.1 (-1 to 0.7)    | 0.744  | 44        |
| Singapore                           | 73 (68 - 77)       | 8.8 (8.3 - 9.4)     | 51 (47 - 55)       | 7.1 (6.6 - 7.6)    | -0.7 (-1.9 to 0.6)  | 0.293  | 55        |
| <b>High-income North America</b>    |                    |                     |                    |                    |                     |        |           |
| Canada                              | 688 (655 - 721)    | 11.8 (11.2 - 12.4)  | 656 (612 - 699)    | 10.1 (9.5 - 10.8)  | -0.5 (-0.9 to -0.1) | 0.018  | 32        |
| Greenland                           | 13 (9 - 15)        | 91.8 (67.1 - 105.4) | 5 (4 - 6)          | 43.3 (33.3 - 51.3) | -2.3 (-2.5 to -2.2) | <0.001 | <b>1</b>  |
| United States of America            | 5394 (5302 - 5498) | 9.7 (9.6 - 9.9)     | 6697 (6445 - 6937) | 10.3 (9.9 - 10.7)  | 0.2 (-0.1 to 0.5)   | 0.244  | <b>30</b> |
| <b>North Africa and Middle East</b> |                    |                     |                    |                    |                     |        |           |
| Afghanistan                         | 134 (90 - 257)     | 4 (2.7 - 7.6)       | 339 (229 - 665)    | 3.2 (2.2 - 6.2)    | -0.6 (-1.2 to 0.1)  | 0.081  | 142       |
| Algeria                             | 415 (255 - 539)    | 4.9 (3 - 6.3)       | 276 (180 - 360)    | 2.7 (1.8 - 3.5)    | -1.9 (-2 to -1.7)   | <0.001 | 164       |
| Bahrain                             | 8 (6 - 9)          | 5.9 (4.6 - 7.3)     | 11 (8 - 15)        | 3.4 (2.4 - 4.6)    | -1.7 (-2.4 to -1.1) | <0.001 | 133       |
| Egypt                               | 224 (163 - 290)    | 1.3 (0.9 - 1.7)     | 303 (217 - 393)    | 1 (0.7 - 1.3)      | -0.7 (-1.4 to -0.1) | 0.026  | 196       |

|                            |                   |                    |                  |                    |                     |        |           |
|----------------------------|-------------------|--------------------|------------------|--------------------|---------------------|--------|-----------|
| Iran (Islamic Republic of) | 1405 (989 - 1567) | 7.6 (5.4 - 8.5)    | 833 (711 - 926)  | 4.7 (4 - 5.2)      | -1.6 (-1.8 to -1.3) | <0.001 | 94        |
| Iraq                       | 320 (233 - 419)   | 5.2 (3.8 - 6.8)    | 429 (306 - 584)  | 3.4 (2.4 - 4.7)    | -1.4 (-1.6 to -1.2) | <0.001 | 132       |
| Jordan                     | 35 (26 - 44)      | 2.6 (1.9 - 3.3)    | 34 (25 - 44)     | 0.9 (0.7 - 1.2)    | -3.3 (-3.8 to -2.8) | <0.001 | 197       |
| Kuwait                     | 7 (6 - 8)         | 1.5 (1.3 - 1.7)    | 13 (11 - 16)     | 1.6 (1.3 - 2)      | 0.8 (-2.3 to 4)     | 0.61   | 188       |
| Lebanon                    | 14 (8 - 19)       | 1.6 (0.9 - 2.2)    | 9 (7 - 12)       | 0.8 (0.6 - 1)      | -2.2 (-2.4 to -1.9) | <0.001 | 199       |
| Libya                      | 60 (37 - 79)      | 4.1 (2.5 - 5.4)    | 84 (54 - 116)    | 4.8 (3.1 - 6.6)    | 0.6 (-0.1 to 1.2)   | 0.08   | 90        |
| Morocco                    | 444 (252 - 599)   | 5.5 (3.1 - 7.4)    | 301 (186 - 459)  | 3.2 (2 - 4.9)      | -1.7 (-1.8 to -1.6) | <0.001 | 141       |
| Oman                       | 8 (5 - 11)        | 1.4 (1 - 2)        | 7 (5 - 9)        | 0.8 (0.6 - 1)      | -1.8 (-2.4 to -1.1) | <0.001 | 201       |
| Palestine                  | 6 (4 - 9)         | 0.9 (0.7 - 1.3)    | 13 (9 - 17)      | 0.8 (0.6 - 1)      | -0.5 (-0.8 to -0.2) | 0.002  | 200       |
| Qatar                      | 7 (5 - 9)         | 6.7 (5.2 - 8.6)    | 15 (11 - 21)     | 3.4 (2.4 - 4.6)    | -2.4 (-3.1 to -1.6) | <0.001 | 137       |
| Saudi Arabia               | 298 (205 - 399)   | 5.9 (4.1 - 7.9)    | 346 (246 - 496)  | 4.2 (3 - 6)        | -1.1 (-1.4 to -0.9) | <0.001 | 108       |
| Sudan                      | 436 (225 - 621)   | 6.8 (3.5 - 9.6)    | 680 (373 - 1076) | 4.7 (2.6 - 7.5)    | -1.1 (-1.4 to -0.9) | <0.001 | 92        |
| Syrian Arab Republic       | 66 (48 - 87)      | 1.5 (1.1 - 2)      | 37 (27 - 52)     | 0.8 (0.6 - 1.1)    | -2.1 (-2.7 to -1.5) | <0.001 | 198       |
| Tunisia                    | 89 (58 - 130)     | 3.3 (2.2 - 4.9)    | 62 (39 - 95)     | 2.5 (1.6 - 3.8)    | -1 (-1.1 to -0.8)   | <0.001 | 171       |
| Türkiye                    | 769 (484 - 1086)  | 4.2 (2.6 - 5.9)    | 737 (501 - 925)  | 3.8 (2.6 - 4.8)    | -0.2 (-0.8 to 0.4)  | 0.448  | 120       |
| United Arab Emirates       | 20 (14 - 29)      | 4.7 (3.4 - 6.9)    | 34 (25 - 48)     | 3.1 (2.2 - 4.3)    | -1 (-3.3 to 1.3)    | 0.385  | 149       |
| Yemen                      | 123 (33 - 203)    | 2.9 (0.8 - 4.8)    | 303 (101 - 502)  | 2.8 (0.9 - 4.6)    | -0.2 (-1.3 to 0.8)  | 0.661  | 161       |
| <b>Oceania</b>             |                   |                    |                  |                    |                     |        |           |
| American Samoa             | 1 (1 - 2)         | 8.3 (6.2 - 10.9)   | 1 (1 - 2)        | 8.6 (6.7 - 11)     | 0.1 (-0.1 to 0.3)   | 0.373  | 43        |
| Cook Islands               | 1 (1 - 1)         | 17.2 (13.3 - 21.9) | 0 (0 - 1)        | 10.4 (8 - 13.3)    | -1.6 (-1.8 to -1.4) | <0.001 | <b>29</b> |
| Fiji                       | 33 (26 - 42)      | 14 (10.8 - 17.5)   | 27 (20 - 36)     | 11.3 (8.3 - 15)    | -0.6 (-1.2 to -0.1) | 0.033  | <b>23</b> |
| Guam                       | 10 (8 - 11)       | 24.3 (21.3 - 27.9) | 7 (6 - 8)        | 18.7 (15.8 - 21.4) | -1.1 (-2.6 to 0.5)  | 0.168  | <b>13</b> |
| Kiribati                   | 6 (4 - 7)         | 24.7 (18.9 - 31)   | 8 (6 - 10)       | 22 (16.2 - 28.1)   | -0.4 (-0.4 to -0.3) | <0.001 | <b>8</b>  |
| Marshall Islands           | 4 (2 - 6)         | 27.4 (15.2 - 36.5) | 4 (2 - 5)        | 23.2 (14.3 - 31.3) | -0.8 (-1.2 to -0.4) | <0.001 | <b>5</b>  |

|                                  |                       |                    |                       |                    |                     |        |           |
|----------------------------------|-----------------------|--------------------|-----------------------|--------------------|---------------------|--------|-----------|
| Micronesia (Federated States of) | 9 (6 - 11)            | 25.6 (17.4 - 32.8) | 7 (5 - 9)             | 22.4 (15.5 - 30)   | -0.4 (-0.5 to -0.3) | <0.001 | <b>6</b>  |
| Nauru                            | 1 (1 - 1)             | 30.5 (18.1 - 39.8) | 1 (1 - 1)             | 28.3 (16.3 - 37.4) | -0.2 (-0.4 to -0.1) | <0.001 | <b>2</b>  |
| Niue                             | 0 (0 - 0)             | 18 (12.9 - 24)     | 0 (0 - 0)             | 25.3 (20.1 - 30.3) | 1.1 (0.4 to 1.8)    | 0.002  | <b>4</b>  |
| Northern Mariana Islands         | 2 (1 - 2)             | 12.9 (9.6 - 17.3)  | 2 (1 - 2)             | 13.4 (10.9 - 15.7) | -0.2 (-1.1 to 0.7)  | 0.62   | <b>19</b> |
| Palau                            | 1 (1 - 1)             | 21.6 (14 - 31.7)   | 1 (1 - 1)             | 22.3 (17.1 - 29.1) | 0.2 (-0.2 to 0.5)   | 0.356  | <b>7</b>  |
| Papua New Guinea                 | 24 (14 - 43)          | 1.9 (1.1 - 3.3)    | 63 (41 - 150)         | 2.1 (1.3 - 4.9)    | 0.5 (-0.3 to 1.3)   | 0.202  | 179       |
| Samoa                            | 11 (8 - 13)           | 18.1 (13.5 - 22.8) | 9 (7 - 12)            | 14.5 (10.5 - 19.1) | -0.7 (-0.8 to -0.6) | <0.001 | <b>16</b> |
| Solomon Islands                  | 24 (10 - 35)          | 21.2 (8.3 - 30.5)  | 45 (30 - 60)          | 21.3 (14.4 - 28.7) | -0.1 (-0.7 to 0.5)  | 0.672  | <b>9</b>  |
| Tokelau                          | 0 (0 - 0)             | 19.2 (13.7 - 25.3) | 0 (0 - 0)             | 26.8 (21.6 - 33.1) | 1.5 (0.4 to 2.6)    | 0.006  | <b>3</b>  |
| Tonga                            | 2 (1 - 2)             | 4.8 (3.8 - 6.1)    | 2 (1 - 2)             | 5.4 (3.8 - 7.5)    | 0.3 (0 to 0.6)      | 0.024  | 77        |
| Tuvalu                           | 1 (0 - 1)             | 27.5 (17.6 - 35.3) | 1 (0 - 1)             | 19 (13.9 - 24.6)   | -1.2 (-1.3 to -1.1) | <0.001 | <b>12</b> |
| Vanuatu                          | 9 (6 - 12)            | 19.7 (12 - 26.3)   | 19 (14 - 24)          | 20 (14.7 - 25.7)   | 0 (-0.3 to 0.3)     | 0.851  | <b>11</b> |
| <b>South Asia</b>                |                       |                    |                       |                    |                     |        |           |
| Bangladesh                       | 4037 (2921 - 4998)    | 11.6 (8.4 - 14.3)  | 1980 (1447 - 2873)    | 4.3 (3.2 - 6.3)    | -3 (-3.6 to -2.4)   | <0.001 | 103       |
| Bhutan                           | 11 (7 - 16)           | 4.6 (2.9 - 7.1)    | 7 (4 - 15)            | 3.3 (2 - 7.1)      | -1.1 (-1.3 to -0.9) | <0.001 | 140       |
| India                            | 49543 (37522 - 56352) | 19.2 (14.6 - 21.9) | 44616 (38126 - 49874) | 11.2 (9.6 - 12.5)  | -1.8 (-2.8 to -0.7) | 0.001  | <b>24</b> |
| Nepal                            | 920 (598 - 1252)      | 15.4 (10 - 21)     | 1126 (808 - 1559)     | 11.9 (8.6 - 16.5)  | -0.8 (-1 to -0.7)   | <0.001 | <b>21</b> |
| Pakistan                         | 2072 (1445 - 2854)    | 5.8 (4.1 - 8)      | 4431 (2910 - 6517)    | 6.1 (4 - 9)        | 0.2 (0 to 0.3)      | 0.01   | 63        |
| <b>Southern Latin America</b>    |                       |                    |                       |                    |                     |        |           |
| Argentina                        | 446 (415 - 475)       | 5.1 (4.8 - 5.5)    | 1114 (1027 - 1199)    | 10.4 (9.6 - 11.2)  | 2.3 (1.4 to 3.1)    | <0.001 | <b>28</b> |
| Chile                            | 544 (503 - 587)       | 14.5 (13.4 - 15.6) | 281 (260 - 304)       | 7.2 (6.6 - 7.7)    | -2.2 (-2.7 to -1.7) | <0.001 | 53        |

|                                    |                    |                    |                   |                    |                     |        |           |
|------------------------------------|--------------------|--------------------|-------------------|--------------------|---------------------|--------|-----------|
| Uruguay                            | 60 (56 - 65)       | 7.9 (7.3 - 8.4)    | 108 (99 - 119)    | 15.1 (13.7 - 16.5) | 2.2 (1.7 to 2.7)    | <0.001 | <b>15</b> |
| <b>Southeast Asia</b>              |                    |                    |                   |                    |                     |        |           |
| Cambodia                           | 145 (107 - 189)    | 4.5 (3.3 - 5.9)    | 143 (94 - 211)    | 3.1 (2 - 4.5)      | -1.2 (-1.3 to -1.1) | <0.001 | 145       |
| Indonesia                          | 1026 (756 - 1238)  | 1.7 (1.3 - 2.1)    | 1050 (843 - 1348) | 1.5 (1.2 - 1.9)    | -0.4 (-0.6 to -0.2) | <0.001 | 190       |
| Lao People's Democratic Republic   | 118 (65 - 164)     | 9.1 (5 - 12.7)     | 112 (77 - 158)    | 5.4 (3.7 - 7.5)    | -1.7 (-1.9 to -1.5) | <0.001 | 80        |
| Malaysia                           | 206 (161 - 266)    | 3.8 (3 - 5)        | 220 (168 - 294)   | 2.7 (2.1 - 3.6)    | -1.5 (-2.1 to -0.9) | <0.001 | 163       |
| Maldives                           | 2 (1 - 3)          | 2.9 (1.9 - 3.8)    | 1 (1 - 2)         | 1.4 (1 - 1.9)      | -2.2 (-2.9 to -1.5) | <0.001 | 192       |
| Mauritius                          | 38 (36 - 41)       | 11.7 (11 - 12.5)   | 19 (17 - 22)      | 7.5 (6.5 - 8.4)    | -1.4 (-2 to -0.8)   | <0.001 | 50        |
| Myanmar                            | 599 (351 - 857)    | 4.6 (2.7 - 6.6)    | 429 (283 - 605)   | 2.8 (1.9 - 4)      | -1.6 (-1.8 to -1.5) | <0.001 | 159       |
| Philippines                        | 839 (583 - 932)    | 4.1 (2.8 - 4.6)    | 1098 (752 - 1313) | 3.4 (2.3 - 4)      | -0.6 (-0.8 to -0.4) | <0.001 | 135       |
| Seychelles                         | 1 (1 - 1)          | 4.8 (3.9 - 5.9)    | 0 (0 - 0)         | 1.2 (0.9 - 1.7)    | -3.3 (-4.8 to -1.9) | <0.001 | 195       |
| Sri Lanka                          | 1793 (1465 - 2053) | 34.6 (28.3 - 39.6) | 613 (451 - 809)   | 11.7 (8.6 - 15.5)  | -3.1 (-4.8 to -1.4) | <0.001 | <b>22</b> |
| Thailand                           | 1695 (1308 - 2216) | 9.5 (7.3 - 12.4)   | 754 (563 - 1025)  | 6.4 (4.8 - 8.7)    | -1.3 (-1.8 to -0.7) | <0.001 | 61        |
| Timor-Leste                        | 14 (9 - 19)        | 6 (4 - 8.3)        | 21 (15 - 29)      | 4.4 (3.1 - 6.1)    | -1 (-2.5 to 0.6)    | 0.215  | 98        |
| Viet Nam                           | 1088 (723 - 1474)  | 5.1 (3.4 - 6.8)    | 815 (586 - 1095)  | 3.8 (2.8 - 5.2)    | -0.9 (-1 to -0.8)   | <0.001 | 119       |
| <b>Southern Sub-Saharan Africa</b> |                    |                    |                   |                    |                     |        |           |
| Botswana                           | 41 (27 - 59)       | 9.1 (5.9 - 13.1)   | 43 (29 - 62)      | 6.5 (4.4 - 9.4)    | -1.1 (-1.3 to -0.8) | <0.001 | 59        |
| Eswatini                           | 23 (17 - 30)       | 8.2 (6 - 11)       | 49 (31 - 71)      | 13.4 (8.4 - 19.3)  | 1.7 (1.5 to 1.9)    | <0.001 | <b>18</b> |
| Lesotho                            | 30 (20 - 49)       | 6.3 (4.2 - 10.3)   | 88 (60 - 117)     | 14.3 (9.8 - 19.2)  | 2.7 (2.3 to 3.1)    | <0.001 | <b>17</b> |
| Namibia                            | 35 (26 - 47)       | 7.4 (5.5 - 9.8)    | 57 (39 - 87)      | 7.6 (5.2 - 11.6)   | 0.1 (-0.3 to 0.6)   | 0.522  | 48        |

|                               |                    |                    |                    |                   |                     |        |           |
|-------------------------------|--------------------|--------------------|--------------------|-------------------|---------------------|--------|-----------|
| South Africa                  | 1057 (858 - 1269)  | 8.9 (7.3 - 10.7)   | 1367 (1151 - 1605) | 9.5 (8 - 11.2)    | 0.3 (-0.3 to 1)     | 0.316  | 37        |
| Zimbabwe                      | 217 (134 - 344)    | 6.1 (3.7 - 9.6)    | 679 (432 - 940)    | 13.3 (8.5 - 18.4) | 2.6 (2 to 3.2)      | <0.001 | <b>20</b> |
| <b>Tropical Latin America</b> |                    |                    |                    |                   |                     |        |           |
| Brazil                        | 1843 (1764 - 1927) | 4 (3.8 - 4.1)      | 2930 (2808 - 3052) | 6 (5.8 - 6.3)     | 1.5 (0.8 to 2.1)    | <0.001 | 65        |
| Paraguay                      | 39 (33 - 47)       | 3.2 (2.7 - 3.8)    | 113 (76 - 143)     | 5.7 (3.8 - 7.2)   | 2 (1 to 2.9)        | <0.001 | 71        |
| <b>Western Europe</b>         |                    |                    |                    |                   |                     |        |           |
| Andorra                       | 1 (0 - 1)          | 5.3 (3.6 - 7.2)    | 0 (0 - 1)          | 3.1 (2.2 - 4.3)   | -1.7 (-2.1 to -1.3) | <0.001 | 144       |
| Austria                       | 190 (178 - 203)    | 11.7 (11 - 12.5)   | 83 (75 - 92)       | 5.9 (5.3 - 6.5)   | -2.3 (-2.6 to -2)   | <0.001 | 68        |
| Belgium                       | 171 (161 - 181)    | 8.5 (8 - 9)        | 109 (98 - 119)     | 5.6 (5 - 6.1)     | -1.4 (-2.1 to -0.8) | <0.001 | 72        |
| Cyprus                        | 5 (4 - 7)          | 2.6 (1.9 - 3.5)    | 4 (3 - 5)          | 1.8 (1.3 - 2.4)   | -1.1 (-2 to -0.2)   | 0.017  | 183       |
| Denmark                       | 84 (79 - 89)       | 7.7 (7.2 - 8.2)    | 38 (34 - 42)       | 3.6 (3.3 - 4)     | -2.5 (-3.1 to -2)   | <0.001 | 128       |
| Finland                       | 171 (161 - 180)    | 17.5 (16.5 - 18.5) | 80 (73 - 87)       | 8.7 (8 - 9.5)     | -2.2 (-3.6 to -0.7) | 0.003  | 42        |
| France                        | 1046 (988 - 1108)  | 8.3 (7.8 - 8.8)    | 430 (386 - 473)    | 3.5 (3.2 - 3.9)   | -2.6 (-3.1 to -2.1) | <0.001 | 130       |
| Germany                       | 1177 (1099 - 1250) | 7.9 (7.4 - 8.4)    | 550 (501 - 601)    | 4.4 (4 - 4.8)     | -1.8 (-2.5 to -1.2) | <0.001 | 100       |
| Greece                        | 47 (43 - 52)       | 2 (1.8 - 2.2)      | 25 (22 - 29)       | 1.6 (1.4 - 1.9)   | -0.7 (-1.9 to 0.6)  | 0.303  | 187       |
| Iceland                       | 6 (6 - 7)          | 9.8 (8.9 - 10.7)   | 4 (3 - 4)          | 5.3 (4.6 - 6)     | -2 (-3.7 to -0.2)   | 0.025  | 82        |
| Ireland                       | 64 (58 - 70)       | 6.5 (6 - 7.2)      | 38 (32 - 44)       | 3.9 (3.3 - 4.5)   | -1.8 (-2.5 to -1.1) | <0.001 | 117       |
| Israel                        | 60 (56 - 64)       | 4.4 (4.1 - 4.7)    | 55 (48 - 61)       | 2.4 (2.2 - 2.7)   | -1.8 (-3.1 to -0.5) | 0.006  | 172       |
| Italy                         | 417 (403 - 432)    | 3.3 (3.2 - 3.5)    | 181 (172 - 192)    | 2.1 (2 - 2.2)     | -1.7 (-2.3 to -1)   | <0.001 | 178       |
| Luxembourg                    | 8 (7 - 9)          | 11 (9.7 - 12.6)    | 3 (3 - 4)          | 3 (2.6 - 3.4)     | -3.9 (-6.2 to -1.5) | 0.001  | 154       |
| Malta                         | 2 (2 - 3)          | 3 (2.6 - 3.3)      | 2 (1 - 2)          | 2.4 (2.1 - 2.7)   | -0.7 (-2.1 to 0.8)  | 0.349  | 174       |
| Monaco                        | 0 (0 - 0)          | 8.9 (6.7 - 11.4)   | 0 (0 - 0)          | 6.7 (5.1 - 9.2)   | -0.9 (-1 to -0.8)   | <0.001 | 58        |

|                            |                 |                    |                    |                 |                     |        |     |
|----------------------------|-----------------|--------------------|--------------------|-----------------|---------------------|--------|-----|
| Netherlands                | 192 (180 - 203) | 5.8 (5.5 - 6.2)    | 149 (138 - 161)    | 5 (4.6 - 5.3)   | -0.6 (-2 to 0.8)    | 0.369  | 86  |
| Norway                     | 118 (113 - 122) | 12.8 (12.4 - 13.3) | 73 (70 - 76)       | 7.4 (7.1 - 7.7) | -1.7 (-3.5 to 0.2)  | 0.073  | 52  |
| Portugal                   | 212 (196 - 226) | 8.5 (7.9 - 9.1)    | 43 (37 - 48)       | 2.6 (2.3 - 3)   | -3.5 (-4.8 to -2.3) | <0.001 | 166 |
| San Marino                 | 0 (0 - 0)       | 5.6 (4.2 - 7.1)    | 0 (0 - 0)          | 3.4 (2.4 - 4.5) | -1.8 (-1.9 to -1.6) | <0.001 | 136 |
| Spain                      | 394 (369 - 422) | 4 (3.8 - 4.3)      | 167 (149 - 183)    | 2.4 (2.1 - 2.6) | -1.8 (-2.9 to -0.7) | 0.001  | 173 |
| Sweden                     | 163 (156 - 171) | 9.9 (9.4 - 10.3)   | 120 (109 - 132)    | 6.7 (6.2 - 7.4) | -1.4 (-2.7 to -0.1) | 0.04   | 57  |
| Switzerland                | 185 (176 - 196) | 13.9 (13.2 - 14.7) | 61 (56 - 66)       | 4.5 (4.1 - 4.9) | -3.4 (-4.5 to -2.3) | <0.001 | 97  |
| United Kingdom             | 854 (840 - 868) | 7.2 (7.1 - 7.3)    | 572 (550 - 590)    | 4.7 (4.6 - 4.9) | -1.2 (-2 to -0.5)   | 0.001  | 93  |
| <b>Western Sub-Saharan</b> |                 |                    |                    |                 |                     |        |     |
| <b>Africa</b>              |                 |                    |                    |                 |                     |        |     |
| Benin                      | 45 (33 - 60)    | 3.1 (2.3 - 4.1)    | 133 (83 - 215)     | 3 (1.9 - 4.9)   | -0.1 (-0.2 to 0)    | 0.175  | 150 |
| Burkina Faso               | 106 (80 - 142)  | 3.6 (2.7 - 4.8)    | 243 (171 - 334)    | 3.3 (2.3 - 4.6) | -0.3 (-0.6 to 0)    | 0.064  | 138 |
| Cabo Verde                 | 6 (4 - 7)       | 5.2 (3.7 - 6.5)    | 9 (6 - 11)         | 5.7 (4 - 7.6)   | 0.4 (-0.2 to 1.1)   | 0.185  | 70  |
| Cameroon                   | 109 (79 - 144)  | 3.4 (2.4 - 4.5)    | 408 (245 - 610)    | 3.9 (2.4 - 5.9) | 0.5 (0.3 to 0.6)    | <0.001 | 114 |
| Chad                       | 44 (29 - 67)    | 2.4 (1.6 - 3.6)    | 202 (129 - 305)    | 3.5 (2.2 - 5.2) | 1.3 (1 to 1.6)      | <0.001 | 131 |
| Côte d'Ivoire              | 146 (105 - 206) | 3.8 (2.8 - 5.4)    | 320 (202 - 500)    | 3.7 (2.3 - 5.8) | -0.1 (-0.5 to 0.4)  | 0.778  | 125 |
| Gambia                     | 8 (4 - 13)      | 2.5 (1.4 - 4.2)    | 28 (17 - 45)       | 3.4 (2.1 - 5.5) | 1 (-0.7 to 2.7)     | 0.242  | 134 |
| Ghana                      | 121 (88 - 167)  | 2.6 (1.9 - 3.5)    | 311 (219 - 450)    | 3 (2.1 - 4.3)   | 0.5 (0.2 to 0.7)    | <0.001 | 156 |
| Guinea                     | 39 (26 - 59)    | 2.3 (1.5 - 3.5)    | 129 (75 - 211)     | 3 (1.7 - 4.9)   | 0.8 (0.6 to 1)      | <0.001 | 155 |
| Guinea-Bissau              | 16 (11 - 24)    | 5.1 (3.2 - 7.3)    | 34 (24 - 48)       | 5.1 (3.6 - 7.1) | 0 (-0.1 to 0.2)     | 0.583  | 83  |
| Liberia                    | 23 (16 - 32)    | 3.2 (2.2 - 4.3)    | 68 (41 - 104)      | 3.8 (2.3 - 5.8) | 0.5 (-0.4 to 1.5)   | 0.256  | 121 |
| Mali                       | 66 (44 - 97)    | 2.6 (1.7 - 3.8)    | 206 (137 - 311)    | 2.6 (1.7 - 3.9) | 0 (-0.3 to 0.4)     | 0.938  | 168 |
| Mauritania                 | 14 (9 - 22)     | 2.2 (1.4 - 3.4)    | 26 (16 - 43)       | 1.8 (1.1 - 3)   | -0.6 (-0.9 to -0.4) | <0.001 | 185 |
| Niger                      | 60 (38 - 95)    | 2.5 (1.5 - 3.9)    | 190 (109 - 354)    | 2.3 (1.3 - 4.2) | -0.2 (-0.6 to 0.1)  | 0.213  | 175 |
| Nigeria                    | 686 (493 - 882) | 2.4 (1.7 - 3.1)    | 1674 (1160 - 2320) | 2.1 (1.5 - 3)   | -0.4 (-0.5 to -0.3) | <0.001 | 176 |

|                       |               |                 |                 |                 |                    |        |     |
|-----------------------|---------------|-----------------|-----------------|-----------------|--------------------|--------|-----|
| Sao Tome and Principe | 0 (0 - 0)     | 0.4 (0.2 - 0.7) | 0 (0 - 1)       | 0.6 (0.4 - 0.9) | 1.2 (0.6 to 1.9)   | <0.001 | 203 |
| Senegal               | 99 (73 - 131) | 4.1 (3 - 5.4)   | 197 (139 - 291) | 3.8 (2.7 - 5.6) | -0.1 (-0.3 to 0.1) | 0.523  | 122 |
| Sierra Leone          | 27 (16 - 44)  | 2.2 (1.3 - 3.6) | 85 (46 - 144)   | 2.9 (1.6 - 5)   | 0.8 (0.3 to 1.3)   | 0.001  | 158 |
| Togo                  | 38 (27 - 52)  | 3.2 (2.3 - 4.3) | 102 (64 - 152)  | 3.9 (2.5 - 5.8) | 0.7 (0.4 to 0.9)   | <0.001 | 116 |

Note: Order is ranked according to the highest to lowest suicide mortality for 10-24 years population in each country around the world in 2021. The top 30 countries in the world are marked in red.

**Table S3. The rate of YLLs of suicide and their AAPC from 1990 to 2021 in 204 regions**

|                                  | Cases (n), 1990       | YLLs (per 100,000 population), 1990 | Cases (n), 2021       | YLLs (per 100,000 population), 2021 | AAPC: 1990-2021     | P value | Order     |
|----------------------------------|-----------------------|-------------------------------------|-----------------------|-------------------------------------|---------------------|---------|-----------|
| <b>Andean Latin America</b>      |                       |                                     |                       |                                     |                     |         |           |
| Bolivia (Plurinational State of) | 9437 (7210 - 12112)   | 471 (359.8 - 604.5)                 | 12524 (8488 - 17457)  | 387.2 (262.4 - 539.7)               | -0.6 (-0.7 to -0.5) | <0.001  | 73        |
| Ecuador                          | 13614 (12726 - 14478) | 417.6 (390.3 - 444.1)               | 33149 (27578 - 39122) | 682.1 (567.5 - 805)                 | 1.2 (-1.3 to 3.8)   | 0.337   | 35        |
| Peru                             | 16549 (13250 - 20309) | 234.9 (188 - 288.2)                 | 19583 (13241 - 25941) | 213.6 (144.4 - 282.9)               | -0.3 (-1.5 to 1)    | 0.686   | 150       |
| <b>Australasia</b>               |                       |                                     |                       |                                     |                     |         |           |
| Australia                        | 32792 (31285 - 34312) | 826 (788 - 864.2)                   | 31220 (29103 - 33067) | 660.8 (616 - 699.9)                 | -0.7 (-1.4 to -0.1) | 0.035   | 37        |
| New Zealand                      | 9400 (8889 - 9850)    | 1117.8 (1057 - 1171.2)              | 7560 (7013 - 8015)    | 746.7 (692.7 - 791.6)               | -1.3 (-2.6 to 0)    | 0.048   | <b>26</b> |
| <b>Caribbean</b>                 |                       |                                     |                       |                                     |                     |         |           |
| Antigua and Barbuda              | 11 (10 - 13)          | 64.4 (54.8 - 75)                    | 10 (9 - 12)           | 52.7 (44 - 62)                      | -0.2 (-1.6 to 1.2)  | 0.762   | 202       |
| Bahamas                          | 87 (77 - 99)          | 108.1 (94.9 - 122.8)                | 93 (67 - 130)         | 94.2 (67.6 - 130.8)                 | -0.3 (-0.9 to 0.3)  | 0.268   | 193       |
| Barbados                         | 144 (128 - 161)       | 212.5 (189.6 - 238.3)               | 75 (55 - 102)         | 132.1 (96.1 - 178.1)                | -1.2 (-1.7 to -0.6) | <0.001  | 182       |
| Belize                           | 134 (120 - 150)       | 214.2 (192.4 - 239.9)               | 269 (232 - 319)       | 204 (175.6 - 241.5)                 | 0.3 (-0.2 to 0.7)   | 0.212   | 158       |
| Bermuda                          | 29 (26 - 33)          | 233.9 (208.1 - 263.8)               | 8 (7 - 10)            | 89.4 (74.1 - 110.8)                 | -3.2 (-3.8 to -2.7) | <0.001  | 194       |
| Cuba                             | 31253 (29722 - 32727) | 1004.9 (955.6 - 1052.3)             | 5697 (4807 - 6570)    | 291.9 (246.3 - 336.6)               | -3.9 (-5.6 to -2.1) | <0.001  | 109       |
| Dominica                         | 32 (25 - 40)          | 139.2 (109.8 - 174.4)               | 23 (17 - 31)          | 139.2 (100.5 - 186.3)               | 0 (-0.2 to 0.2)     | 0.877   | 180       |
| Dominican Republic               | 5865 (4867 - 7064)    | 246.2 (204.3 - 296.5)               | 7226 (5028 - 9665)    | 252.9 (176 - 338.3)                 | 0 (-0.6 to 0.7)     | 0.887   | 128       |
| Grenada                          | 60 (52 - 69)          | 229.4 (197.4 - 262.2)               | 34 (28 - 40)          | 133.3 (111.4 - 157.7)               | -1.8 (-2.3 to -1.2) | <0.001  | 181       |
| Guyana                           | 3239 (2556 - 3808)    | 1249.3 (985.7 - 1468.6)             | 2944 (2249 - 3838)    | 1409 (1076.5 - 1837)                | 0.4 (-0.7 to 1.6)   | 0.468   | <b>10</b> |
| Haiti                            | 9003 (4381 - 12625)   | 463.8 (225.7 - 650.4)               | 13144 (6967 - 18830)  | 351.4 (186.3 - 503.4)               | -0.5 (-0.7 to -0.3) | <0.001  | 85        |
| Jamaica                          | 261 (197 - 348)       | 34.2 (25.8 - 45.6)                  | 250 (187 - 333)       | 35.2 (26.3 - 46.9)                  | 0.2 (-1.5 to 1.9)   | 0.85    | 204       |
| Puerto Rico                      | 3073 (2820 - 3334)    | 312.8 (287 - 339.3)                 | 891 (716 - 1097)      | 145.7 (117 - 179.4)                 | -2.6 (-3.3 to -1.9) | <0.001  | 177       |
| Saint Kitts and Nevis            | 16 (14 - 18)          | 126.8 (113.4 - 142.2)               | 12 (9 - 18)           | 100.5 (73.9 - 145.5)                | -1.4 (-2.1 to -0.6) | <0.001  | 191       |



|                                  |                       |                         |                       |                         |                     |        |     |
|----------------------------------|-----------------------|-------------------------|-----------------------|-------------------------|---------------------|--------|-----|
| Saint Lucia                      | 114 (103 - 128)       | 251.9 (226.4 - 282.9)   | 76 (61 - 95)          | 209.8 (167.5 - 261.7)   | -0.8 (-1.3 to -0.2) | 0.011  | 154 |
| Saint Vincent and the Grenadines | 79 (69 - 89)          | 210.8 (184.4 - 237.9)   | 49 (41 - 58)          | 185 (153.6 - 220.2)     | -0.5 (-1.5 to 0.6)  | 0.37   | 165 |
| Suriname                         | 1551 (851 - 1847)     | 1269.1 (696.5 - 1511.4) | 1542 (1251 - 1887)    | 1084.9 (880.2 - 1327.5) | -0.4 (-1.7 to 0.9)  | 0.56   | 14  |
| Trinidad and Tobago              | 2981 (2782 - 3206)    | 868.6 (810.5 - 934)     | 1441 (1082 - 1857)    | 525.8 (394.9 - 677.5)   | -1.4 (-3 to 0.1)    | 0.074  | 50  |
| United States Virgin Islands     | 89 (67 - 115)         | 317.6 (240 - 408)       | 58 (39 - 88)          | 416.4 (280 - 631.2)     | 1 (-0.2 to 2.2)     | 0.111  | 67  |
| <b>Central Europe</b>            |                       |                         |                       |                         |                     |        |     |
| Albania                          | 2572 (2114 - 3075)    | 262.6 (215.9 - 313.9)   | 621 (454 - 824)       | 117.5 (86 - 155.9)      | -2.8 (-4 to -1.6)   | <0.001 | 186 |
| Bosnia and Herzegovina           | 7705 (6514 - 8788)    | 670.1 (566.5 - 764.3)   | 1628 (1294 - 1982)    | 300.7 (239 - 366.1)     | -2.7 (-3.9 to -1.5) | <0.001 | 106 |
| Bulgaria                         | 11869 (11029 - 12708) | 644 (598.4 - 689.6)     | 3249 (2742 - 3707)    | 334.7 (282.5 - 381.9)   | -2.4 (-3 to -1.8)   | <0.001 | 91  |
| Croatia                          | 5904 (5526 - 6310)    | 571.4 (534.9 - 610.7)   | 1695 (1462 - 1912)    | 255.9 (220.8 - 288.8)   | -2.4 (-3.3 to -1.5) | <0.001 | 127 |
| Czechia                          | 12893 (12068 - 13720) | 542.7 (508 - 577.5)     | 4720 (4251 - 5155)    | 302.2 (272.2 - 330.1)   | -2 (-3.5 to -0.6)   | 0.006  | 104 |
| Hungary                          | 17187 (16206 - 18111) | 745.6 (703 - 785.7)     | 5168 (4554 - 5655)    | 355.8 (313.5 - 389.3)   | -2.5 (-3.7 to -1.3) | <0.001 | 84  |
| Montenegro                       | 905 (756 - 1063)      | 570.6 (476.5 - 670.4)   | 443 (360 - 542)       | 378.2 (307.1 - 462.6)   | -1.3 (-4.1 to 1.7)  | 0.395  | 78  |
| North Macedonia                  | 1710 (1379 - 2109)    | 334.9 (270.2 - 413)     | 809 (562 - 1091)      | 219.1 (152.3 - 295.4)   | -1.3 (-1.7 to -0.9) | <0.001 | 143 |
| Poland                           | 47857 (46273 - 49474) | 558.2 (539.7 - 577.1)   | 28880 (27029 - 30480) | 496.2 (464.4 - 523.7)   | -0.3 (-0.9 to 0.4)  | 0.439  | 54  |
| Romania                          | 20270 (18810 - 21900) | 343.6 (318.8 - 371.2)   | 8509 (7320 - 9808)    | 274.3 (236 - 316.2)     | -0.9 (-2 to 0.2)    | 0.098  | 116 |
| Serbia                           | 16363 (13125 - 19140) | 748.3 (600.2 - 875.2)   | 3474 (2820 - 4229)    | 215.1 (174.6 - 261.9)   | -3.9 (-4.7 to -3)   | <0.001 | 148 |
| Slovakia                         | 5924 (5050 - 6932)    | 465.4 (396.8 - 544.7)   | 2463 (2001 - 2980)    | 294.7 (239.4 - 356.5)   | -1.5 (-2.4 to -0.5) | 0.002  | 108 |
| Slovenia                         | 3674 (3449 - 3921)    | 829 (778.3 - 884.8)     | 835 (745 - 926)       | 282.4 (251.8 - 312.9)   | -3.9 (-4.6 to -3.2) | <0.001 | 112 |
| <b>Central Asia</b>              |                       |                         |                       |                         |                     |        |     |
| Armenia                          | 1780 (1689 - 1881)    | 204.4 (193.9 - 216)     | 943 (830 - 1056)      | 175 (154 - 196)         | -0.2 (-2 to 1.6)    | 0.835  | 170 |
| Azerbaijan                       | 3688 (3220 - 4521)    | 174.4 (152.2 - 213.8)   | 2830 (2109 - 3738)    | 128.3 (95.6 - 169.4)    | -0.9 (-2 to 0.1)    | 0.089  | 183 |
| Georgia                          | 3478 (3180 - 3832)    | 270.8 (247.6 - 298.3)   | 1916 (1666 - 2182)    | 307.5 (267.4 - 350.2)   | 0.6 (-0.5 to 1.7)   | 0.278  | 99  |

|                                    |                       |                        |                          |                       |                     |        |     |
|------------------------------------|-----------------------|------------------------|--------------------------|-----------------------|---------------------|--------|-----|
| Kazakhstan                         | 42896 (39423 - 46527) | 982 (902.5 - 1065.1)   | 28272 (25488 - 30929)    | 689.2 (621.3 - 753.9) | -1 (-1.6 to -0.5)   | <0.001 | 34  |
| Kyrgyzstan                         | 8452 (7419 - 9386)    | 654.2 (574.3 - 726.5)  | 7494 (6154 - 8875)       | 422.3 (346.9 - 500.2) | -1.4 (-2.1 to -0.6) | <0.001 | 64  |
| Mongolia                           | 6601 (4989 - 8261)    | 931.9 (704.2 - 1166.2) | 5836 (4412 - 6896)       | 768.5 (581 - 908.2)   | -0.6 (-1.8 to 0.7)  | 0.386  | 25  |
| Tajikistan                         | 4567 (3952 - 5338)    | 275.5 (238.4 - 322)    | 5040 (3583 - 7796)       | 181.3 (128.9 - 280.5) | -1.3 (-1.8 to -0.7) | <0.001 | 169 |
| Turkmenistan                       | 6309 (5677 - 6994)    | 550.4 (495.2 - 610.1)  | 8794 (6871 - 11185)      | 659.1 (515 - 838.4)   | 0.6 (-0.6 to 1.7)   | 0.324  | 39  |
| Uzbekistan                         | 29412 (26684 - 32136) | 460.4 (417.7 - 503)    | 58085 (49672 - 67159)    | 725.2 (620.1 - 838.4) | 1.5 (0.8 to 2.3)    | <0.001 | 29  |
| <b>Central Latin America</b>       |                       |                        |                          |                       |                     |        |     |
| Colombia                           | 31874 (29642 - 34373) | 311.3 (289.5 - 335.7)  | 62995 (53028 - 73369)    | 526.3 (443.1 - 613)   | 1.7 (0.7 to 2.7)    | 0.001  | 49  |
| Costa Rica                         | 2925 (2670 - 3195)    | 317.5 (289.8 - 346.8)  | 5893 (5304 - 6530)       | 538.9 (485 - 597.1)   | 2 (-0.1 to 4)       | 0.058  | 47  |
| El Salvador                        | 15659 (13121 - 18011) | 881.3 (738.5 - 1013.7) | 9476 (7324 - 11963)      | 542 (418.9 - 684.3)   | -2.2 (-3.9 to -0.5) | 0.013  | 46  |
| Guatemala                          | 8868 (8093 - 9676)    | 332.5 (303.4 - 362.8)  | 21388 (18234 - 24635)    | 432.5 (368.7 - 498.2) | 0.5 (-1.2 to 2.2)   | 0.562  | 62  |
| Honduras                           | 5146 (4210 - 6318)    | 335.7 (274.6 - 412.1)  | 6164 (3886 - 9313)       | 193.6 (122 - 292.4)   | -1.8 (-2 to -1.5)   | <0.001 | 162 |
| Mexico                             | 61910 (59272 - 64674) | 213.1 (204 - 222.6)    | 163040 (149876 - 176854) | 491.4 (451.7 - 533)   | 2.8 (2.3 to 3.3)    | <0.001 | 56  |
| Nicaragua                          | 4860 (4115 - 6450)    | 370.4 (313.7 - 491.6)  | 7204 (5598 - 8948)       | 382.9 (297.5 - 475.6) | 0 (-0.6 to 0.7)     | 0.928  | 76  |
| Panama                             | 2238 (2024 - 2468)    | 296.1 (267.9 - 326.6)  | 3749 (3106 - 4454)       | 340.1 (281.8 - 404)   | 0.5 (0 to 0.9)      | 0.038  | 88  |
| Venezuela (Bolivarian Republic of) | 23515 (21859 - 25219) | 392.4 (364.8 - 420.9)  | 36560 (28257 - 47963)    | 616.8 (476.7 - 809.1) | 2.1 (1.1 to 3)      | <0.001 | 41  |
| <b>Central Sub-Saharan Africa</b>  |                       |                        |                          |                       |                     |        |     |
| Angola                             | 11747 (8509 - 15781)  | 366.6 (265.5 - 492.5)  | 28108 (18772 - 39347)    | 266.2 (177.8 - 372.6) | -0.9 (-1.8 to 0)    | 0.048  | 124 |
| Central African Republic           | 3900 (2779 - 5291)    | 463 (330 - 628.2)      | 7618 (5241 - 10889)      | 419.9 (288.9 - 600.1) | -0.4 (-0.5 to -0.3) | <0.001 | 66  |
| Congo                              | 2966 (2143 - 4053)    | 364.1 (263 - 497.4)    | 5040 (3630 - 7043)       | 302.3 (217.7 - 422.4) | -0.4 (-1.2 to 0.3)  | 0.264  | 103 |
| Democratic Republic of the Congo   | 37021 (27090 - 51501) | 308.3 (225.6 - 428.9)  | 85857 (59265 - 134252)   | 288.2 (198.9 - 450.6) | -0.3 (-0.7 to 0.1)  | 0.179  | 111 |
| Equatorial Guinea                  | 554 (378 - 770)       | 424.8 (289.7 - 590.7)  | 1647 (941 - 2596)        | 300.9 (171.9 - 474.2) | -1 (-1.4 to -0.7)   | <0.001 | 105 |

|                                       |                             |                          |                          |                       |                     |        |           |
|---------------------------------------|-----------------------------|--------------------------|--------------------------|-----------------------|---------------------|--------|-----------|
| Gabon                                 | 926 (648 - 1272)            | 301.4 (211.1 - 414.2)    | 1580 (1024 - 2310)       | 279.9 (181.5 - 409.5) | -0.2 (-0.4 to 0.1)  | 0.152  | 113       |
| <b>East Asia</b>                      |                             |                          |                          |                       |                     |        |           |
| China                                 | 2970859 (1947414 - 3411865) | 823 (539.5 - 945.2)      | 461196 (379915 - 583162) | 197.1 (162.3 - 249.2) | -4.5 (-4.8 to -4.1) | <0.001 | 159       |
| Democratic People's Republic of Korea | 28429 (19115 - 40948)       | 516.6 (347.3 - 744)      | 18535 (12889 - 27449)    | 339.8 (236.3 - 503.3) | -1.3 (-1.5 to -1.2) | <0.001 | 89        |
| Taiwan (Province of China)            | 16627 (15729 - 17740)       | 290.8 (275.1 - 310.3)    | 12988 (11759 - 14216)    | 369.2 (334.3 - 404.1) | 0.8 (0.2 to 1.5)    | 0.015  | 81        |
| <b>Eastern Europe</b>                 |                             |                          |                          |                       |                     |        |           |
| Belarus                               | 13896 (12884 - 14809)       | 627.6 (581.9 - 668.9)    | 7892 (6477 - 9449)       | 555.1 (455.5 - 664.6) | -0.6 (-1.3 to 0)    | 0.069  | 45        |
| Estonia                               | 3274 (2979 - 3590)          | 1002.4 (912 - 1099.2)    | 921 (778 - 1034)         | 455.2 (384.6 - 511.1) | -2.7 (-4.6 to -0.9) | 0.005  | 60        |
| Latvia                                | 4832 (4511 - 5145)          | 895.4 (835.8 - 953.4)    | 1117 (978 - 1239)        | 411.8 (360.5 - 456.7) | -2.4 (-2.9 to -2)   | <0.001 | 68        |
| Lithuania                             | 6839 (6426 - 7222)          | 835.8 (785.4 - 882.7)    | 2636 (2353 - 2914)       | 638.7 (570.2 - 706.1) | -0.7 (-2.4 to 1)    | 0.422  | 40        |
| Republic of Moldova                   | 5860 (5417 - 6277)          | 570.2 (527.1 - 610.8)    | 2092 (1841 - 2353)       | 383.3 (337.5 - 431.2) | -1.4 (-2.3 to -0.5) | 0.002  | 75        |
| Russian Federation                    | 320191 (314645 - 325322)    | 1018.1 (1000.4 - 1034.4) | 159822 (147644 - 171142) | 678.4 (626.7 - 726.4) | -1.6 (-2.5 to -0.7) | <0.001 | 36        |
| Ukraine                               | 62557 (58763 - 66737)       | 576.5 (541.5 - 615)      | 47869 (35034 - 60778)    | 727.2 (532.3 - 923.4) | 0.6 (0 to 1.3)      | 0.066  | <b>28</b> |
| <b>Eastern Sub-Saharan Africa</b>     |                             |                          |                          |                       |                     |        |           |
| Burundi                               | 8948 (6025 - 13063)         | 533.5 (359.2 - 778.8)    | 13106 (8873 - 20962)     | 303.6 (205.5 - 485.6) | -1.9 (-2.3 to -1.4) | <0.001 | 101       |
| Comoros                               | 395 (128 - 638)             | 256.4 (83.1 - 414.1)     | 479 (307 - 704)          | 217.2 (139.4 - 319.5) | -1.3 (-6.4 to 4.1)  | 0.638  | 145       |
| Djibouti                              | 257 (150 - 454)             | 174.6 (101.8 - 309)      | 653 (353 - 1156)         | 183.4 (99.3 - 324.7)  | 0.4 (-0.1 to 0.8)   | 0.125  | 167       |
| Eritrea                               | 4569 (3297 - 6138)          | 405.4 (292.6 - 544.7)    | 7833 (5153 - 11387)      | 375.7 (247.2 - 546.3) | -0.3 (-0.6 to 0.1)  | 0.137  | 79        |
| Ethiopia                              | 77892 (52850 - 96581)       | 484.2 (328.5 - 600.3)    | 89280 (70201 - 108661)   | 236.7 (186.1 - 288.1) | -2.3 (-2.4 to -2.2) | <0.001 | 135       |
| Kenya                                 | 16044 (12841 - 25011)       | 202.3 (161.9 - 315.4)    | 36767 (27524 - 55324)    | 213.1 (159.5 - 320.6) | 0.2 (-0.1 to 0.4)   | 0.243  | 151       |

|                                  |                          |                          |                          |                          |                     |        |           |
|----------------------------------|--------------------------|--------------------------|--------------------------|--------------------------|---------------------|--------|-----------|
| Madagascar                       | 12938 (9712 - 16443)     | 337.8 (253.6 - 429.4)    | 28543 (19239 - 39668)    | 297.1 (200.2 - 412.8)    | -0.4 (-0.5 to -0.3) | <0.001 | 107       |
| Malawi                           | 11981 (8950 - 16032)     | 379.1 (283.2 - 507.3)    | 24694 (17266 - 34402)    | 347.1 (242.7 - 483.6)    | -0.3 (-0.7 to 0.1)  | 0.147  | 86        |
| Mozambique                       | 12206 (8376 - 16119)     | 295.4 (202.7 - 390)      | 40744 (26827 - 59252)    | 385 (253.5 - 559.9)      | 0.9 (0.7 to 1.1)    | <0.001 | 74        |
| Rwanda                           | 12985 (9342 - 16858)     | 573.5 (412.6 - 744.6)    | 11782 (7819 - 17417)     | 273 (181.2 - 403.5)      | -2.4 (-2.8 to -1.9) | <0.001 | 117       |
| Somalia                          | 6395 (3706 - 10927)      | 251.1 (145.5 - 429)      | 19469 (11181 - 32794)    | 267.6 (153.7 - 450.8)    | 0.2 (0 to 0.4)      | 0.016  | 121       |
| South Sudan                      | 5148 (3398 - 7196)       | 259.4 (171.2 - 362.6)    | 11342 (7653 - 16118)     | 333.5 (225 - 473.9)      | 1 (-0.1 to 2.1)     | 0.073  | 93        |
| Uganda                           | 12172 (8194 - 17236)     | 215.4 (145 - 305.1)      | 39314 (28117 - 54762)    | 259.1 (185.3 - 361)      | 0.5 (0.2 to 0.9)    | 0.002  | 126       |
| United Republic of Tanzania      | 24931 (18915 - 32305)    | 292.5 (221.9 - 379)      | 41912 (29060 - 59528)    | 217.3 (150.7 - 308.7)    | -0.9 (-1.1 to -0.8) | <0.001 | 144       |
| Zambia                           | 9820 (7500 - 12565)      | 354 (270.4 - 453)        | 21514 (14313 - 31720)    | 325.9 (216.8 - 480.5)    | -0.2 (-0.6 to 0.1)  | 0.175  | 96        |
| <b>High-income Asia Pacific</b>  |                          |                          |                          |                          |                     |        |           |
| Brunei Darussalam                | 183 (118 - 253)          | 240.7 (154.4 - 331.7)    | 113 (88 - 146)           | 106.7 (82.6 - 138.1)     | -2.7 (-3.5 to -1.9) | <0.001 | 189       |
| Japan                            | 116723 (114355 - 119029) | 415.6 (407.2 - 423.8)    | 122371 (120013 - 124343) | 696.6 (683.2 - 707.8)    | 1.8 (0.9 to 2.6)    | <0.001 | 33        |
| Republic of Korea                | 88277 (75687 - 154159)   | 671.7 (575.9 - 1173)     | 44810 (32431 - 49416)    | 581.4 (420.7 - 641.1)    | -0.2 (-1 to 0.7)    | 0.67   | 44        |
| Singapore                        | 5039 (4723 - 5348)       | 611.1 (572.7 - 648.5)    | 3578 (3321 - 3859)       | 494.2 (458.7 - 533)      | -0.7 (-1.8 to 0.5)  | 0.237  | 55        |
| <b>High-income North America</b> |                          |                          |                          |                          |                     |        |           |
| Canada                           | 48138 (45797 - 50398)    | 825.9 (785.7 - 864.7)    | 45745 (42682 - 48702)    | 707.6 (660.2 - 753.3)    | -0.5 (-0.9 to -0.1) | 0.015  | 32        |
| Greenland                        | 880 (641 - 1010)         | 6365.9 (4637.4 - 7303.6) | 340 (262 - 402)          | 3022.7 (2329.8 - 3573.7) | -2.3 (-2.5 to -2.2) | <0.001 | <b>1</b>  |
| United States of America         | 377462 (371081 - 384746) | 682.2 (670.7 - 695.4)    | 468512 (450916 - 485523) | 723 (695.8 - 749.2)      | 0.2 (-0.1 to 0.5)   | 0.247  | <b>30</b> |

**North Africa and  
Middle East**

|                            |                         |                         |                       |                       |                     |        |     |
|----------------------------|-------------------------|-------------------------|-----------------------|-----------------------|---------------------|--------|-----|
| Afghanistan                | 9521 (6374 - 18281)     | 281.9 (188.7 - 541.3)   | 23868 (16135 - 46839) | 224.1 (151.5 - 439.8) | -0.6 (-1.2 to 0)    | 0.048  | 142 |
| Bahrain                    | 534 (419 - 667)         | 413.4 (324.3 - 516.1)   | 792 (568 - 1066)      | 236 (169.3 - 317.5)   | -1.8 (-2.8 to -0.8) | <0.001 | 137 |
| Egypt                      | 15931 (11593 - 20570)   | 92.6 (67.4 - 119.6)     | 21352 (15316 - 27598) | 71.8 (51.5 - 92.8)    | -0.8 (-1.4 to -0.2) | 0.011  | 196 |
| Iran (Islamic Republic of) | 100071 (70331 - 111519) | 543 (381.6 - 605.2)     | 58477 (49984 - 64954) | 330.1 (282.2 - 366.7) | -1.6 (-1.9 to -1.3) | <0.001 | 94  |
| Iraq                       | 22562 (16468 - 29544)   | 368.3 (268.8 - 482.3)   | 30151 (21486 - 40991) | 240.9 (171.7 - 327.5) | -1.4 (-1.6 to -1.2) | <0.001 | 132 |
| Jordan                     | 2471 (1848 - 3125)      | 182.3 (136.3 - 230.5)   | 2359 (1741 - 3042)    | 62.3 (46 - 80.3)      | -3.3 (-3.9 to -2.8) | <0.001 | 197 |
| Kuwait                     | 491 (433 - 554)         | 106.5 (94 - 120.2)      | 934 (762 - 1144)      | 112 (91.4 - 137.2)    | 0.8 (-2.3 to 4)     | 0.62   | 187 |
| Lebanon                    | 966 (561 - 1356)        | 111.3 (64.6 - 156.2)    | 664 (507 - 854)       | 56 (42.7 - 72.1)      | -2.2 (-2.4 to -2)   | <0.001 | 199 |
| Libya                      | 4251 (2642 - 5633)      | 288.9 (179.6 - 382.9)   | 5908 (3773 - 8077)    | 338.9 (216.4 - 463.3) | 0.5 (-0.1 to 1.2)   | 0.097  | 90  |
| Morocco                    | 31405 (17799 - 42461)   | 387.9 (219.9 - 524.5)   | 21220 (13139 - 32157) | 227.1 (140.6 - 344.2) | -1.7 (-1.9 to -1.6) | <0.001 | 141 |
| Oman                       | 547 (369 - 785)         | 100.6 (68 - 144.4)      | 499 (368 - 657)       | 53.8 (39.7 - 70.8)    | -1.8 (-2.5 to -1.2) | <0.001 | 201 |
| Palestine                  | 449 (318 - 625)         | 66.1 (46.9 - 92.1)      | 894 (663 - 1169)      | 54.1 (40.1 - 70.7)    | -0.5 (-0.9 to -0.2) | 0.001  | 200 |
| Qatar                      | 462 (358 - 596)         | 468.3 (363.3 - 604.2)   | 1031 (741 - 1429)     | 231.5 (166.4 - 320.9) | -2.4 (-3.2 to -1.7) | <0.001 | 140 |
| Saudi Arabia               | 20941 (14392 - 28064)   | 415.2 (285.4 - 556.5)   | 23826 (16986 - 33983) | 289.3 (206.3 - 412.7) | -1.2 (-1.4 to -0.9) | <0.001 | 110 |
| Sudan                      | 31005 (15971 - 44096)   | 480 (247.3 - 682.7)     | 47955 (26294 - 75796) | 334.1 (183.2 - 528)   | -1.2 (-1.4 to -1)   | <0.001 | 92  |
| Syrian Arab Republic       | 4673 (3386 - 6151)      | 107.8 (78.1 - 142)      | 2651 (1921 - 3728)    | 57.3 (41.5 - 80.6)    | -2.1 (-2.7 to -1.4) | <0.001 | 198 |
| Tunisia                    | 6359 (4128 - 9236)      | 237.8 (154.4 - 345.4)   | 4343 (2729 - 6732)    | 173 (108.7 - 268.1)   | -1 (-1.2 to -0.8)   | <0.001 | 171 |
| Türkiye                    | 54484 (34143 - 76886)   | 296.8 (186 - 418.9)     | 51668 (35117 - 64930) | 268.4 (182.4 - 337.3) | -0.3 (-0.8 to 0.3)  | 0.394  | 119 |
| United Arab Emirates       | 1396 (1006 - 2039)      | 331.9 (239.1 - 484.6)   | 2348 (1698 - 3296)    | 210.5 (152.2 - 295.6) | -1.1 (-3.4 to 1.2)  | 0.344  | 153 |
| Yemen                      | 8864 (2386 - 14576)     | 210.4 (56.6 - 346)      | 21548 (7232 - 35664)  | 195.8 (65.7 - 324.1)  | -0.3 (-1.3 to 0.8)  | 0.593  | 161 |
| <b>Oceania</b>             |                         |                         |                       |                       |                     |        |     |
| American Samoa             | 88 (65 - 114)           | 584 (432.7 - 760.6)     | 85 (66 - 108)         | 606.8 (473 - 773.5)   | 0.1 (-0.1 to 0.3)   | 0.354  | 42  |
| Cook Islands               | 72 (55 - 91)            | 1215.8 (936.9 - 1537.9) | 29 (23 - 38)          | 721 (557.7 - 921.5)   | -1.7 (-1.9 to -1.5) | <0.001 | 31  |

|                                  |                    |                          |                     |                          |                     |        |           |
|----------------------------------|--------------------|--------------------------|---------------------|--------------------------|---------------------|--------|-----------|
| Fiji                             | 2337 (1820 - 2932) | 982.5 (765.2 - 1232.5)   | 1900 (1391 - 2533)  | 793.8 (581 - 1058)       | -0.6 (-1.2 to -0.1) | 0.033  | <b>23</b> |
| Guam                             | 666 (583 - 767)    | 1697.7 (1486.4 - 1953.8) | 468 (398 - 539)     | 1302.8 (1106.9 - 1498.9) | -1.1 (-2.7 to 0.5)  | 0.18   | <b>13</b> |
| Kiribati                         | 388 (298 - 485)    | 1735.2 (1332.5 - 2171.7) | 545 (401 - 698)     | 1540.8 (1135.1 - 1973.4) | -0.4 (-0.4 to -0.3) | <0.001 | <b>8</b>  |
| Marshall Islands                 | 290 (162 - 384)    | 1902.9 (1064.4 - 2518.7) | 269 (167 - 362)     | 1622.9 (1009.6 - 2186.6) | -0.7 (-1.1 to -0.3) | <0.001 | <b>5</b>  |
| Micronesia (Federated States of) | 622 (422 - 797)    | 1809.5 (1229.2 - 2321)   | 492 (341 - 656)     | 1569.2 (1088.1 - 2094.6) | -0.5 (-0.5 to -0.4) | <0.001 | <b>6</b>  |
| Nauru                            | 65 (39 - 84)       | 2142.7 (1274 - 2789)     | 68 (40 - 90)        | 1988.2 (1154.6 - 2639.6) | -0.2 (-0.4 to -0.1) | <0.001 | <b>2</b>  |
| Niue                             | 8 (6 - 11)         | 1269.7 (912.2 - 1683.6)  | 7 (6 - 9)           | 1806.5 (1430.1 - 2158.1) | 1.2 (0.4 to 1.9)    | 0.001  | <b>4</b>  |
| Northern Mariana Islands         | 114 (85 - 153)     | 898.3 (671.6 - 1206.4)   | 107 (88 - 126)      | 936.5 (766.4 - 1097.8)   | -0.2 (-1.1 to 0.7)  | 0.702  | <b>19</b> |
| Palau                            | 71 (46 - 104)      | 1513.1 (985 - 2220.8)    | 55 (42 - 71)        | 1562.5 (1201.3 - 2027.1) | 0.1 (-0.2 to 0.5)   | 0.374  | <b>7</b>  |
| Papua New Guinea                 | 1722 (1017 - 3047) | 131.5 (77.7 - 232.7)     | 4445 (2887 - 10591) | 145.6 (94.5 - 346.8)     | 0.5 (-0.3 to 1.3)   | 0.208  | 178       |
| Samoa                            | 753 (560 - 947)    | 1276.5 (949.3 - 1605)    | 637 (464 - 839)     | 1017.4 (741.2 - 1340.8)  | -0.7 (-0.8 to -0.6) | <0.001 | <b>16</b> |
| Solomon Islands                  | 1731 (683 - 2490)  | 1500.7 (592.3 - 2158.5)  | 3151 (2140 - 4244)  | 1495.4 (1015.6 - 2014.3) | -0.1 (-0.7 to 0.4)  | 0.627  | <b>9</b>  |
| Tokelau                          | 6 (4 - 8)          | 1358.3 (967.5 - 1786.6)  | 7 (6 - 9)           | 1913.7 (1541.8 - 2366.5) | 1.5 (0.4 to 2.6)    | 0.006  | <b>3</b>  |
| Tonga                            | 114 (90 - 145)     | 342.6 (269.1 - 434.4)    | 119 (84 - 164)      | 381.8 (268.7 - 528.1)    | 0.3 (0 to 0.6)      | 0.046  | 77        |

|                                  |                             |                          |                             |                          |                     |        |           |
|----------------------------------|-----------------------------|--------------------------|-----------------------------|--------------------------|---------------------|--------|-----------|
| Tuvalu                           | 48 (30 - 61)                | 1939.4 (1238.1 - 2484.9) | 46 (34 - 60)                | 1327.2 (981 - 1710.3)    | -1.2 (-1.3 to -1.1) | <0.001 | <b>12</b> |
| Vanuatu                          | 658 (401 - 875)             | 1389.7 (846.5 - 1848.2)  | 1313 (966 - 1682)           | 1400.3 (1030.4 - 1793.7) | 0 (-0.3 to 0.3)     | 0.94   | <b>11</b> |
| <b>South Asia</b>                |                             |                          |                             |                          |                     |        |           |
| Bangladesh                       | 287179 (207243 - 355923)    | 822.9 (593.8 - 1019.8)   | 140800 (102841 - 203816)    | 307.5 (224.6 - 445.1)    | -3 (-3.6 to -2.4)   | <0.001 | 100       |
| Bhutan                           | 740 (470 - 1135)            | 325.3 (206.7 - 498.8)    | 476 (288 - 1025)            | 232.7 (140.5 - 500.5)    | -1.1 (-1.3 to -0.9) | <0.001 | 139       |
| India                            | 3485621 (2634271 - 3967233) | 1352.2 (1022 - 1539.1)   | 3123647 (2669898 - 3495433) | 785.2 (671.1 - 878.6)    | -1.8 (-2.8 to -0.7) | 0.001  | <b>24</b> |
| Nepal                            | 64951 (42252 - 88350)       | 1090.4 (709.3 - 1483.3)  | 78867 (56877 - 108910)      | 834.5 (601.8 - 1152.3)   | -0.9 (-1 to -0.7)   | <0.001 | <b>21</b> |
| Pakistan                         | 146204 (102065 - 201393)    | 410.5 (286.5 - 565.4)    | 310995 (204513 - 458292)    | 428.4 (281.7 - 631.3)    | 0.2 (0 to 0.3)      | 0.02   | 63        |
| <b>Southern Latin America</b>    |                             |                          |                             |                          |                     |        |           |
| Argentina                        | 31400 (29266 - 33420)       | 360.4 (335.9 - 383.6)    | 77918 (71955 - 83861)       | 728.8 (673 - 784.3)      | 2.2 (1.4 to 3.1)    | <0.001 | <b>27</b> |
| Chile                            | 37867 (35043 - 40855)       | 1007.8 (932.6 - 1087.3)  | 19527 (18036 - 21102)       | 497.6 (459.6 - 537.7)    | -2.2 (-2.7 to -1.7) | <0.001 | 53        |
| Uruguay                          | 4265 (3955 - 4557)          | 556.4 (516 - 594.6)      | 7528 (6876 - 8230)          | 1046.4 (955.6 - 1143.9)  | 2.1 (1.5 to 2.7)    | <0.001 | <b>15</b> |
| <b>Southeast Asia</b>            |                             |                          |                             |                          |                     |        |           |
| Cambodia                         | 10192 (7529 - 13333)        | 317.8 (234.8 - 415.7)    | 10008 (6552 - 14744)        | 216.2 (141.5 - 318.4)    | -1.2 (-1.4 to -1.1) | <0.001 | 146       |
| Indonesia                        | 72365 (53323 - 86803)       | 121.7 (89.7 - 146)       | 73752 (59165 - 94694)       | 106.7 (85.6 - 137)       | -0.4 (-0.6 to -0.2) | <0.001 | 190       |
| Lao People's Democratic Republic | 8328 (4552 - 11617)         | 645.6 (352.9 - 900.6)    | 7833 (5383 - 11052)         | 375.4 (258 - 529.6)      | -1.7 (-1.9 to -1.5) | <0.001 | 80        |
| Malaysia                         | 14440 (11286 - 18683)       | 268.8 (210.1 - 347.8)    | 15308 (11726 - 20480)       | 189.2 (144.9 - 253.1)    | -1.5 (-2.1 to -0.9) | <0.001 | 164       |

|                                    |                          |                          |                          |                         |                     |        |           |
|------------------------------------|--------------------------|--------------------------|--------------------------|-------------------------|---------------------|--------|-----------|
| Maldives                           | 148 (94 - 193)           | 207.3 (131.4 - 268.8)    | 96 (72 - 131)            | 95.8 (71.8 - 131.4)     | -2.3 (-3 to -1.6)   | <0.001 | 192       |
| Mauritius                          | 2665 (2488 - 2836)       | 821.2 (766.6 - 874)      | 1334 (1160 - 1496)       | 516.2 (448.9 - 579.1)   | -1.4 (-2 to -0.8)   | <0.001 | 52        |
| Myanmar                            | 42077 (24693 - 59964)    | 322.1 (189 - 459)        | 30031 (19865 - 41960)    | 197 (130.3 - 275.3)     | -1.6 (-1.9 to -1.4) | <0.001 | 160       |
| Philippines                        | 58803 (40840 - 65393)    | 287.2 (199.4 - 319.3)    | 76762 (52377 - 91715)    | 236.2 (161.2 - 282.2)   | -0.6 (-0.8 to -0.4) | <0.001 | 136       |
| Seychelles                         | 74 (59 - 91)             | 330.5 (266.3 - 406.7)    | 18 (13 - 24)             | 83.6 (58.2 - 111.2)     | -3.4 (-4.9 to -1.8) | <0.001 | 195       |
| Sri Lanka                          | 125274 (102387 - 142824) | 2418.8 (1976.9 - 2757.7) | 42687 (31435 - 56291)    | 815.5 (600.6 - 1075.5)  | -3.5 (-5.5 to -1.3) | 0.001  | <b>22</b> |
| Thailand                           | 118688 (91730 - 154953)  | 662.4 (511.9 - 864.8)    | 52313 (39107 - 71063)    | 445.1 (332.7 - 604.6)   | -1.3 (-1.8 to -0.7) | <0.001 | 61        |
| Timor-Leste                        | 974 (648 - 1343)         | 423.3 (281.6 - 583.6)    | 1476 (1031 - 2033)       | 311.9 (217.7 - 429.4)   | -1 (-2.5 to 0.6)    | 0.214  | 98        |
| Viet Nam                           | 76023 (50964 - 102877)   | 352.9 (236.6 - 477.5)    | 56824 (40867 - 76187)    | 267.5 (192.4 - 358.7)   | -0.9 (-1 to -0.8)   | <0.001 | 122       |
| <b>Southern Sub-Saharan Africa</b> |                          |                          |                          |                         |                     |        |           |
| Botswana                           | 2899 (1894 - 4158)       | 642.8 (419.9 - 921.8)    | 2984 (2012 - 4321)       | 456.4 (307.7 - 660.9)   | -1.1 (-1.3 to -0.9) | <0.001 | 59        |
| Eswatini                           | 1601 (1174 - 2141)       | 581.3 (426.2 - 777)      | 3460 (2170 - 4973)       | 940.7 (589.8 - 1352)    | 1.6 (1.4 to 1.8)    | <0.001 | <b>18</b> |
| Lesotho                            | 2138 (1420 - 3481)       | 447.6 (297.3 - 728.5)    | 6145 (4208 - 8201)       | 1004.1 (687.6 - 1340.1) | 2.7 (2.3 to 3.1)    | <0.001 | <b>17</b> |
| Namibia                            | 2480 (1846 - 3286)       | 522.5 (389.1 - 692.4)    | 3990 (2696 - 6034)       | 535.1 (361.6 - 809.3)   | 0.1 (-0.3 to 0.6)   | 0.564  | 48        |
| South Africa                       | 73083 (59453 - 87748)    | 618.7 (503.3 - 742.8)    | 94560 (79618 - 111413)   | 659.8 (555.5 - 777.4)   | 0.2 (-0.5 to 0.9)   | 0.618  | 38        |
| Zimbabwe                           | 15303 (9462 - 24085)     | 426.1 (263.4 - 670.6)    | 47672 (30400 - 65974)    | 934.2 (595.7 - 1292.8)  | 2.6 (2 to 3.2)      | <0.001 | <b>20</b> |
| <b>Tropical Latin America</b>      |                          |                          |                          |                         |                     |        |           |
| Brazil                             | 128829 (123419 - 134713) | 276.3 (264.7 - 288.9)    | 204450 (195972 - 213122) | 420.8 (403.3 - 438.6)   | 1.5 (0.8 to 2.1)    | <0.001 | 65        |



|                       |                       |                             |                       |                       |                     |        |     |
|-----------------------|-----------------------|-----------------------------|-----------------------|-----------------------|---------------------|--------|-----|
| Paraguay              | 2777 (2342 - 3315)    | 225.1 (189.9 - 268.7)       | 7980 (5373 - 10073)   | 400.9 (269.9 - 506.1) | 1.9 (1 to 2.9)      | <0.001 | 70  |
| <b>Western Europe</b> |                       |                             |                       |                       |                     |        |     |
| Andorra               | 45 (31 - 61)          | 366.5 (252.6 - 502.3)       | 28 (20 - 39)          | 214.9 (153.3 - 296.3) | -1.7 (-2.1 to -1.3) | <0.001 | 149 |
| Austria               | 13177 (12358 - 14062) | 810.2 (759.9 - 864.6)       | 5794 (5245 - 6402)    | 410.1 (371.3 - 453.2) | -2.3 (-2.6 to -2)   | <0.001 | 69  |
| Belgium               | 11863 (11176 - 12548) | 589.3 (555.2 - 623.3)       | 7608 (6835 - 8303)    | 387.3 (347.9 - 422.7) | -1.4 (-2.1 to -0.8) | <0.001 | 72  |
| Cyprus                | 342 (253 - 457)       | 179.6 (132.9 - 240.4)       | 271 (191 - 354)       | 125 (88.1 - 163.3)    | -1.2 (-2.1 to -0.3) | 0.011  | 185 |
| Denmark               | 5820 (5485 - 6187)    | 532.3 (501.6 - 565.9)       | 2652 (2381 - 2921)    | 252.5 (226.8 - 278.2) | -2.3 (-3 to -1.6)   | <0.001 | 129 |
| Finland               | 11840 (11155 - 12486) | 1216.3 (1145.9 -<br>1282.7) | 5557 (5089 - 6066)    | 606 (554.9 - 661.5)   | -2 (-3.2 to -0.7)   | 0.002  | 43  |
| France                | 72417 (68426 - 76608) | 572.9 (541.3 - 606)         | 29856 (26787 - 32775) | 244.3 (219.2 - 268.2) | -2.6 (-3.1 to -2.1) | <0.001 | 131 |
| Germany               | 81314 (75978 - 86313) | 545.9 (510.1 - 579.5)       | 38288 (34885 - 41847) | 303.3 (276.3 - 331.5) | -1.8 (-2.5 to -1.2) | <0.001 | 102 |
| Greece                | 3281 (2978 - 3633)    | 140 (127.1 - 155)           | 1724 (1488 - 1988)    | 111.7 (96.4 - 128.8)  | -0.7 (-1.9 to 0.6)  | 0.296  | 188 |
| Iceland               | 431 (392 - 473)       | 681.4 (619.6 - 748.6)       | 252 (221 - 283)       | 369.2 (323.6 - 414.8) | -2 (-3.7 to -0.2)   | 0.027  | 82  |
| Ireland               | 4442 (4082 - 4889)    | 456.1 (419.1 - 502)         | 2636 (2235 - 3082)    | 268.1 (227.3 - 313.4) | -1.8 (-2.5 to -1.1) | <0.001 | 120 |
| Israel                | 4182 (3899 - 4478)    | 307.1 (286.3 - 328.8)       | 3784 (3374 - 4205)    | 167.9 (149.7 - 186.6) | -1.8 (-3.1 to -0.5) | 0.006  | 172 |
| Italy                 | 28955 (27979 - 30007) | 231.3 (223.5 - 239.7)       | 12626 (11960 - 13334) | 145.2 (137.5 - 153.3) | -1.7 (-2.3 to -1)   | <0.001 | 179 |
| Luxembourg            | 553 (484 - 629)       | 765.7 (670 - 870.1)         | 223 (191 - 255)       | 208.3 (178.2 - 238.2) | -3.9 (-5.7 to -2)   | <0.001 | 156 |
| Malta                 | 168 (150 - 190)       | 205.7 (183 - 232.2)         | 106 (92 - 121)        | 166 (144.3 - 190.3)   | -0.7 (-2.1 to 0.8)  | 0.371  | 174 |
| Monaco                | 27 (20 - 34)          | 612.9 (466.8 - 783.1)       | 24 (19 - 33)          | 464.9 (353.6 - 630.6) | -0.9 (-1 to -0.8)   | <0.001 | 58  |
| Netherlands           | 13294 (12528 - 14050) | 405.8 (382.4 - 428.9)       | 10318 (9570 - 11109)  | 342.8 (318 - 369.1)   | -0.6 (-2 to 0.9)    | 0.421  | 87  |
| Norway                | 8251 (7958 - 8568)    | 900.1 (868.1 - 934.6)       | 5128 (4910 - 5348)    | 519.3 (497.2 - 541.6) | -1.7 (-3.5 to 0.1)  | 0.068  | 51  |
| Portugal              | 14797 (13689 - 15772) | 593.1 (548.7 - 632.2)       | 2979 (2610 - 3365)    | 181.6 (159.1 - 205.1) | -3.6 (-4.8 to -2.4) | <0.001 | 168 |
| San Marino            | 22 (16 - 28)          | 392.3 (293.5 - 494.3)       | 13 (9 - 17)           | 232.7 (168.9 - 309.6) | -1.8 (-1.9 to -1.6) | <0.001 | 138 |
| Spain                 | 27469 (25701 - 29400) | 282 (263.9 - 301.9)         | 11621 (10416 - 12780) | 166.1 (148.9 - 182.7) | -1.8 (-2.9 to -0.7) | 0.001  | 173 |
| Sweden                | 11327 (10830 - 11884) | 684.2 (654.2 - 717.8)       | 8297 (7587 - 9151)    | 467.6 (427.6 - 515.7) | -1.4 (-2.7 to -0.1) | 0.036  | 57  |
| Switzerland           | 12824 (12153 - 13538) | 964.5 (914 - 1018.2)        | 4269 (3878 - 4599)    | 314 (285.2 - 338.2)   | -3.4 (-4.4 to -2.3) | <0.001 | 97  |

|                                   |                       |                       |                         |                       |                     |        |     |
|-----------------------------------|-----------------------|-----------------------|-------------------------|-----------------------|---------------------|--------|-----|
| United Kingdom                    | 59062 (58060 - 60036) | 498.3 (489.9 - 506.5) | 39581 (38104 - 40814)   | 327.2 (315 - 337.4)   | -1.2 (-2 to -0.5)   | 0.002  | 95  |
| <b>Western Sub-Saharan Africa</b> |                       |                       |                         |                       |                     |        |     |
| Benin                             | 3211 (2364 - 4276)    | 222.5 (163.9 - 296.4) | 9435 (5924 - 15338)     | 215.5 (135.3 - 350.3) | -0.1 (-0.3 to 0)    | 0.071  | 147 |
| Burkina Faso                      | 7651 (5779 - 10275)   | 261 (197.2 - 350.6)   | 17386 (12173 - 23907)   | 239.2 (167.4 - 328.9) | -0.3 (-0.6 to 0)    | 0.048  | 134 |
| Cabo Verde                        | 413 (300 - 518)       | 361.9 (263.2 - 453.8) | 598 (426 - 794)         | 398.5 (283.8 - 529.4) | 0.4 (-0.2 to 1.1)   | 0.193  | 71  |
| Cameroon                          | 7801 (5634 - 10235)   | 242 (174.7 - 317.4)   | 28911 (17372 - 43118)   | 278.4 (167.3 - 415.2) | 0.4 (0.2 to 0.7)    | <0.001 | 114 |
| Chad                              | 3123 (2075 - 4793)    | 171.1 (113.6 - 262.5) | 14438 (9237 - 21841)    | 247.5 (158.3 - 374.4) | 1.3 (1 to 1.6)      | <0.001 | 130 |
| Côte d'Ivoire                     | 10408 (7536 - 14734)  | 272.3 (197.2 - 385.5) | 22777 (14429 - 35408)   | 264.8 (167.7 - 411.6) | -0.1 (-0.5 to 0.4)  | 0.723  | 125 |
| Gambia                            | 555 (314 - 924)       | 177.3 (100.3 - 295.2) | 1949 (1196 - 3154)      | 239.3 (146.8 - 387.2) | 1 (-0.7 to 2.7)     | 0.253  | 133 |
| Ghana                             | 8628 (6245 - 11868)   | 183.3 (132.6 - 252.1) | 21943 (15508 - 31782)   | 208.9 (147.7 - 302.6) | 0.4 (0.2 to 0.7)    | <0.001 | 155 |
| Guinea                            | 2776 (1850 - 4211)    | 165.7 (110.4 - 251.4) | 9166 (5390 - 15053)     | 211.6 (124.4 - 347.6) | 0.8 (0.6 to 0.9)    | <0.001 | 152 |
| Guinea-Bissau                     | 1172 (750 - 1703)     | 362.5 (232 - 526.8)   | 2440 (1711 - 3394)      | 363 (254.5 - 505)     | 0 (-0.2 to 0.2)     | 0.928  | 83  |
| Liberia                           | 1661 (1153 - 2262)    | 228.5 (158.6 - 311.1) | 4833 (2887 - 7393)      | 268.7 (160.5 - 411.1) | 0.5 (-0.4 to 1.4)   | 0.291  | 118 |
| Mali                              | 4742 (3167 - 6954)    | 185.9 (124.1 - 272.6) | 14685 (9722 - 22117)    | 183.7 (121.6 - 276.7) | 0 (-0.4 to 0.4)     | 0.993  | 166 |
| Mauritania                        | 994 (635 - 1559)      | 156.2 (99.7 - 244.9)  | 1830 (1128 - 3074)      | 127.4 (78.6 - 214)    | -0.7 (-0.9 to -0.4) | <0.001 | 184 |
| Niger                             | 4325 (2726 - 6838)    | 176.7 (111.4 - 279.4) | 13609 (7829 - 25262)    | 161.6 (92.9 - 299.9)  | -0.3 (-0.6 to 0.1)  | 0.167  | 175 |
| Nigeria                           | 49079 (35006 - 63064) | 173.9 (124 - 223.4)   | 119301 (83102 - 164729) | 153.1 (106.6 - 211.4) | -0.4 (-0.5 to -0.3) | <0.001 | 176 |
| Sao Tome and Principe             | 13 (6 - 20)           | 31.4 (15.5 - 49.3)    | 31 (18 - 45)            | 43.3 (26.1 - 64)      | 1.1 (0.5 to 1.8)    | 0.001  | 203 |
| Senegal                           | 7109 (5223 - 9393)    | 293.5 (215.6 - 387.7) | 13992 (9842 - 20595)    | 267.4 (188.1 - 393.7) | -0.1 (-0.3 to 0.1)  | 0.296  | 123 |
| Sierra Leone                      | 1945 (1150 - 3177)    | 159.9 (94.6 - 261.2)  | 6002 (3276 - 10269)     | 206.3 (112.6 - 352.9) | 0.8 (0.3 to 1.3)    | 0.002  | 157 |
| Togo                              | 2722 (1944 - 3711)    | 227.8 (162.7 - 310.6) | 7193 (4569 - 10797)     | 274.7 (174.5 - 412.3) | 0.6 (0.4 to 0.9)    | <0.001 | 115 |

Note: Order is ranked according to the highest to lowest suicide mortality for 10-24 years population in each country around the world in 2021. The top 30 countries in the world are marked in red.

**Table S4. The trends in rate of suicide mortality in 204 countries by Joinpoint regression**

| location            | Year        | Estimate (95%CI)      | P value |
|---------------------|-------------|-----------------------|---------|
| Afghanistan         | 1990 - 1995 | 4.3 (3.2 to 5.3)      | <0.001  |
|                     | 1995 - 1999 | -1.7 (-3.7 to 0.4)    | 0.103   |
|                     | 1999 - 2002 | -7.7 (-11.5 to -3.8)  | 0.001   |
|                     | 2002 - 2005 | 1.4 (-2.5 to 5.4)     | 0.469   |
|                     | 2005 - 2009 | -3.1 (-5.1 to -1.1)   | 0.005   |
|                     | 2009 - 2021 | 0.1 (-0.2 to 0.3)     | 0.548   |
| Albania             | 1990 - 1998 | 2.9 (1.4 to 4.5)      | 0.001   |
|                     | 1998 - 2018 | -2.9 (-3.4 to -2.3)   | <0.001  |
|                     | 2018 - 2021 | -15.7 (-25.6 to -4.6) | 0.009   |
| Algeria             | 1990 - 1992 | -3.1 (-5 to -1.2)     | 0.004   |
|                     | 1992 - 2001 | 0 (-0.2 to 0.2)       | 0.812   |
|                     | 2001 - 2005 | -3.5 (-4.5 to -2.5)   | <0.001  |
|                     | 2005 - 2015 | -1.9 (-2.1 to -1.7)   | <0.001  |
|                     | 2015 - 2021 | -2.9 (-3.2 to -2.6)   | <0.001  |
| American Samoa      | 1990 - 2008 | -0.8 (-1 to -0.7)     | <0.001  |
|                     | 2008 - 2015 | 2.2 (1.5 to 2.9)      | <0.001  |
|                     | 2015 - 2021 | 0.5 (-0.3 to 1.3)     | 0.182   |
| Andorra             | 1990 - 1992 | 1 (-1.8 to 3.9)       | 0.464   |
|                     | 1992 - 2000 | -1.9 (-2.3 to -1.6)   | <0.001  |
|                     | 2000 - 2003 | 4.2 (1.4 to 7.1)      | 0.006   |
|                     | 2003 - 2006 | 0.6 (-2.3 to 3.5)     | 0.681   |
|                     | 2006 - 2011 | -8.1 (-8.8 to -7.3)   | <0.001  |
|                     | 2011 - 2021 | -1.2 (-1.3 to -1)     | <0.001  |
| Angola              | 1990 - 1994 | 0.9 (-1.3 to 3.2)     | 0.399   |
|                     | 1994 - 1997 | -7.5 (-13.7 to -0.8)  | 0.031   |
|                     | 1997 - 2000 | 3.5 (-3.3 to 10.8)    | 0.304   |
|                     | 2000 - 2021 | -0.9 (-1 to -0.7)     | <0.001  |
| Antigua and Barbuda | 1990 - 1998 | 5.3 (1.8 to 9)        | 0.004   |
|                     | 1998 - 2007 | -4.9 (-8.2 to -1.6)   | 0.006   |
|                     | 2007 - 2021 | -0.2 (-1.8 to 1.5)    | 0.844   |
| Argentina           | 1990 - 2002 | 7.3 (6.8 to 7.7)      | <0.001  |
|                     | 2002 - 2005 | -3.6 (-9.3 to 2.4)    | 0.222   |
|                     | 2005 - 2012 | 2 (0.9 to 3)          | 0.001   |
|                     | 2012 - 2019 | -0.1 (-1.2 to 1.1)    | 0.897   |
|                     | 2019 - 2021 | -8.2 (-15.3 to -0.5)  | 0.038   |
| Armenia             | 1990 - 1994 | 11.6 (6.7 to 16.8)    | <0.001  |
|                     | 1994 - 2003 | -10 (-11.8 to -8.1)   | <0.001  |
|                     | 2003 - 2006 | 33.4 (14.9 to 54.8)   | 0.001   |
|                     | 2006 - 2010 | 3.8 (-2.8 to 10.8)    | 0.245   |
|                     | 2010 - 2021 | -5 (-6 to -3.9)       | <0.001  |
| Australia           | 1990 - 1994 | -1.7 (-3.2 to -0.1)   | 0.034   |
|                     | 1994 - 1997 | 4.4 (-0.4 to 9.5)     | 0.069   |

|            |             |                        |        |
|------------|-------------|------------------------|--------|
|            | 1997 - 2003 | -7.6 (-8.7 to -6.5)    | <0.001 |
|            | 2003 - 2009 | -0.9 (-2 to 0.3)       | 0.128  |
|            | 2009 - 2019 | 3 (2.5 to 3.4)         | <0.001 |
|            | 2019 - 2021 | -3 (-9.2 to 3.7)       | 0.35   |
| Austria    | 1990 - 2006 | -2.9 (-3.3 to -2.4)    | <0.001 |
|            | 2006 - 2021 | -1.7 (-2.2 to -1.2)    | <0.001 |
| Azerbaijan | 1990 - 1993 | 25.5 (19.7 to 31.6)    | <0.001 |
|            | 1993 - 1997 | -18.9 (-24.1 to -13.3) | <0.001 |
|            | 1997 - 2006 | 2.8 (1.8 to 3.7)       | <0.001 |
|            | 2006 - 2017 | -0.3 (-1 to 0.5)       | 0.445  |
|            | 2017 - 2021 | -8.4 (-11.9 to -4.8)   | <0.001 |
| Bahamas    | 1990 - 1999 | -0.3 (-0.9 to 0.4)     | 0.396  |
|            | 1999 - 2005 | -3.4 (-4.9 to -1.9)    | <0.001 |
|            | 2005 - 2011 | 4.5 (2.9 to 6.2)       | <0.001 |
|            | 2011 - 2021 | -1.4 (-2.3 to -0.6)    | 0.002  |
| Bahrain    | 1990 - 1995 | -2.5 (-4.3 to -0.6)    | 0.014  |
|            | 1995 - 2001 | 6.3 (4.3 to 8.3)       | <0.001 |
|            | 2001 - 2017 | -4.6 (-5 to -4.2)      | <0.001 |
|            | 2017 - 2021 | -0.5 (-3.9 to 3.1)     | 0.784  |
| Bangladesh | 1990 - 1996 | -1.8 (-2.5 to -1)      | <0.001 |
|            | 1996 - 2004 | -3.3 (-3.8 to -2.7)    | <0.001 |
|            | 2004 - 2007 | -0.6 (-4 to 2.9)       | 0.71   |
|            | 2007 - 2010 | -3.6 (-6.8 to -0.4)    | 0.03   |
|            | 2010 - 2013 | -8.7 (-12.2 to -5)     | <0.001 |
|            | 2013 - 2021 | -2.2 (-2.7 to -1.6)    | <0.001 |
| Barbados   | 1990 - 1997 | 0.5 (-0.9 to 2)        | 0.455  |
|            | 1997 - 2007 | -4.7 (-5.7 to -3.7)    | <0.001 |
|            | 2007 - 2021 | 0.5 (-0.2 to 1.3)      | 0.164  |
| Belarus    | 1990 - 1993 | 10.2 (6.7 to 13.8)     | <0.001 |
|            | 1993 - 2000 | 5.1 (4.1 to 6.2)       | <0.001 |
|            | 2000 - 2011 | -0.5 (-1 to 0)         | 0.044  |
|            | 2011 - 2017 | -10.7 (-12.2 to -9.2)  | <0.001 |
|            | 2017 - 2021 | -2.7 (-6.1 to 1)       | 0.138  |
| Belgium    | 1990 - 1995 | 4.8 (2.7 to 7.1)       | <0.001 |
|            | 1995 - 2006 | -3.8 (-4.5 to -3.1)    | <0.001 |
|            | 2006 - 2011 | 1.1 (-1.8 to 4.2)      | 0.437  |
|            | 2011 - 2021 | -3.2 (-4 to -2.3)      | <0.001 |
| Belize     | 1990 - 1998 | 7.6 (6.1 to 9.2)       | <0.001 |
|            | 1998 - 2021 | -2.1 (-2.5 to -1.8)    | <0.001 |
| Benin      | 1990 - 1999 | 1.1 (0.9 to 1.2)       | <0.001 |
|            | 1999 - 2006 | -1.9 (-2.2 to -1.5)    | <0.001 |
|            | 2006 - 2013 | 1.8 (1.4 to 2.2)       | <0.001 |
|            | 2013 - 2021 | -1.5 (-1.7 to -1.2)    | <0.001 |
| Bermuda    | 1990 - 2006 | -4.8 (-5.1 to -4.4)    | <0.001 |

|                                  |             |                       |        |
|----------------------------------|-------------|-----------------------|--------|
|                                  | 2006 - 2011 | 0.7 (-2.4 to 3.9)     | 0.641  |
|                                  | 2011 - 2021 | -2.7 (-3.7 to -1.8)   | <0.001 |
| Bhutan                           | 1990 - 1997 | 0 (-0.6 to 0.5)       | 0.896  |
|                                  | 1997 - 2014 | -1 (-1.2 to -0.8)     | <0.001 |
|                                  | 2014 - 2021 | -2.3 (-3.1 to -1.6)   | <0.001 |
| Bolivia (Plurinational State of) | 1990 - 1994 | 0.2 (0 to 0.5)        | 0.088  |
|                                  | 1994 - 2000 | 0.8 (0.6 to 1)        | <0.001 |
|                                  | 2000 - 2006 | -0.6 (-0.8 to -0.4)   | <0.001 |
|                                  | 2006 - 2009 | -0.1 (-1.1 to 1)      | 0.894  |
|                                  | 2009 - 2018 | -1.5 (-1.7 to -1.4)   | <0.001 |
|                                  | 2018 - 2021 | -2.3 (-2.9 to -1.7)   | <0.001 |
| Bosnia and Herzegovina           | 1990 - 1992 | 14.5 (3.5 to 26.7)    | 0.012  |
|                                  | 1992 - 1997 | -8.7 (-12.7 to -4.4)  | 0.001  |
|                                  | 1997 - 2013 | -2.1 (-2.6 to -1.6)   | <0.001 |
|                                  | 2013 - 2018 | 1.4 (-2 to 5)         | 0.401  |
|                                  | 2018 - 2021 | -12.4 (-17.7 to -6.7) | <0.001 |
| Botswana                         | 1990 - 1994 | 3 (2.3 to 3.7)        | <0.001 |
|                                  | 1994 - 2002 | 0.1 (-0.2 to 0.5)     | 0.341  |
|                                  | 2002 - 2006 | -5.1 (-6.1 to -4)     | <0.001 |
|                                  | 2006 - 2011 | 2.1 (1.5 to 2.7)      | <0.001 |
|                                  | 2011 - 2014 | -2.9 (-4.5 to -1.2)   | 0.003  |
|                                  | 2014 - 2018 | -5.3 (-6.1 to -4.5)   | <0.001 |
|                                  | 2018 - 2021 | -1.7 (-2.7 to -0.7)   | 0.004  |
| Brazil                           | 1990 - 1994 | 2.5 (0.8 to 4.2)      | 0.007  |
|                                  | 1994 - 1997 | -1.7 (-6.6 to 3.4)    | 0.489  |
|                                  | 1997 - 2013 | 0.4 (0.2 to 0.6)      | <0.001 |
|                                  | 2013 - 2019 | 6.6 (5.5 to 7.8)      | <0.001 |
|                                  | 2019 - 2021 | -2.3 (-7 to 2.7)      | 0.344  |
| Brunei Darussalam                | 1990 - 2001 | -4.5 (-6 to -3)       | <0.001 |
|                                  | 2001 - 2013 | -0.3 (-1.5 to 0.9)    | 0.596  |
|                                  | 2013 - 2021 | -3.7 (-5.7 to -1.7)   | 0.001  |
| Bulgaria                         | 1990 - 1997 | 2.9 (1.6 to 4.2)      | <0.001 |
|                                  | 1997 - 2003 | -6.1 (-8.1 to -4.2)   | <0.001 |
|                                  | 2003 - 2012 | -1 (-2.1 to 0.1)      | 0.076  |
|                                  | 2012 - 2021 | -5.1 (-6.2 to -4)     | <0.001 |
| Burkina Faso                     | 1990 - 1992 | -1.9 (-4.9 to 1.1)    | 0.197  |
|                                  | 1992 - 2000 | 0.1 (-0.3 to 0.5)     | 0.695  |
|                                  | 2000 - 2010 | -1 (-1.3 to -0.7)     | <0.001 |
|                                  | 2010 - 2016 | 2.7 (1.9 to 3.4)      | <0.001 |
|                                  | 2016 - 2021 | -2.2 (-3 to -1.5)     | <0.001 |
| Burundi                          | 1990 - 1996 | -0.9 (-1.5 to -0.2)   | 0.013  |
|                                  | 1996 - 2008 | -3 (-3.2 to -2.7)     | <0.001 |

|                          |             |                       |        |
|--------------------------|-------------|-----------------------|--------|
|                          | 2008 - 2011 | 0.6 (-4.1 to 5.4)     | 0.808  |
|                          | 2011 - 2021 | -1.9 (-2.2 to -1.5)   | <0.001 |
| Cabo Verde               | 1990 - 2005 | 0.9 (0.6 to 1.2)      | <0.001 |
|                          | 2005 - 2008 | -3.3 (-9 to 2.8)      | 0.269  |
|                          | 2008 - 2016 | -0.1 (-0.9 to 0.8)    | 0.897  |
|                          | 2016 - 2021 | 2.2 (0.6 to 3.8)      | 0.008  |
| Cambodia                 | 1990 - 1998 | -0.9 (-1.2 to -0.6)   | <0.001 |
|                          | 1998 - 2006 | -1.9 (-2.2 to -1.5)   | <0.001 |
|                          | 2006 - 2021 | -1 (-1.2 to -0.9)     | <0.001 |
| Cameroon                 | 1990 - 1992 | 4 (2.6 to 5.4)        | <0.001 |
|                          | 1992 - 2000 | 2.6 (2.4 to 2.8)      | <0.001 |
|                          | 2000 - 2006 | -0.1 (-0.4 to 0.3)    | 0.726  |
|                          | 2006 - 2010 | 1.3 (0.5 to 2.1)      | 0.003  |
|                          | 2010 - 2014 | -0.6 (-1.4 to 0.2)    | 0.141  |
|                          | 2014 - 2021 | -2.3 (-2.5 to -2.1)   | <0.001 |
| Canada                   | 1990 - 1995 | -0.2 (-1.1 to 0.7)    | 0.661  |
|                          | 1995 - 2007 | -2.7 (-2.9 to -2.4)   | <0.001 |
|                          | 2007 - 2013 | 1 (0.1 to 1.9)        | 0.031  |
|                          | 2013 - 2018 | 3.4 (2.1 to 4.7)      | <0.001 |
|                          | 2018 - 2021 | -1.2 (-3.8 to 1.6)    | 0.376  |
| Central African Republic | 1990 - 2021 | -0.4 (-0.5 to -0.3)   | <0.001 |
| Chad                     | 1990 - 1995 | 1.4 (0.2 to 2.6)      | 0.025  |
|                          | 1995 - 2001 | 4.8 (3.6 to 6)        | <0.001 |
|                          | 2001 - 2021 | 0.2 (0.1 to 0.3)      | 0.007  |
| Chile                    | 1990 - 2003 | -4.6 (-5 to -4.2)     | <0.001 |
|                          | 2003 - 2009 | 4.7 (3.3 to 6.1)      | <0.001 |
|                          | 2009 - 2013 | -7.3 (-10.1 to -4.4)  | <0.001 |
|                          | 2013 - 2021 | -0.7 (-1.6 to 0.1)    | 0.077  |
| China                    | 1990 - 1993 | -1.4 (-3.1 to 0.3)    | 0.094  |
|                          | 1993 - 2001 | -6.6 (-6.9 to -6.2)   | <0.001 |
|                          | 2001 - 2004 | -5.3 (-6.9 to -3.6)   | <0.001 |
|                          | 2004 - 2007 | -7.4 (-8.6 to -6.2)   | <0.001 |
|                          | 2007 - 2010 | -2.4 (-4.1 to -0.7)   | 0.011  |
|                          | 2010 - 2013 | -7.1 (-9.3 to -4.9)   | <0.001 |
|                          | 2013 - 2021 | -1.8 (-2.1 to -1.5)   | <0.001 |
| Colombia                 | 1990 - 1993 | 1.7 (-1.9 to 5.3)     | 0.335  |
|                          | 1993 - 1996 | 13.4 (5.8 to 21.6)    | 0.002  |
|                          | 1996 - 2008 | 0 (-0.5 to 0.5)       | 0.997  |
|                          | 2008 - 2014 | -2.4 (-3.7 to -1)     | 0.002  |
|                          | 2014 - 2018 | 8.9 (5.3 to 12.5)     | <0.001 |
|                          | 2018 - 2021 | -3.8 (-9.1 to 1.7)    | 0.157  |
| Comoros                  | 1990 - 2008 | -3 (-4 to -2)         | <0.001 |
|                          | 2008 - 2011 | -21.3 (-47.3 to 17.6) | 0.229  |

|               |             |                       |        |
|---------------|-------------|-----------------------|--------|
|               | 2011 - 2014 | 36.8 (-10 to 107.9)   | 0.135  |
|               | 2014 - 2021 | -0.8 (-4.3 to 2.7)    | 0.629  |
| Congo         | 1990 - 1997 | 3.1 (1.9 to 4.4)      | <0.001 |
|               | 1997 - 2002 | -4.2 (-7 to -1.4)     | 0.006  |
|               | 2002 - 2006 | 1 (-3.1 to 5.2)       | 0.618  |
|               | 2006 - 2021 | -1.1 (-1.5 to -0.7)   | <0.001 |
| Cook Islands  | 1990 - 1997 | -2.9 (-3 to -2.7)     | <0.001 |
|               | 1997 - 2000 | -1.7 (-2.8 to -0.6)   | 0.006  |
|               | 2000 - 2006 | -3.3 (-3.5 to -3.1)   | <0.001 |
|               | 2006 - 2009 | -1.2 (-2.2 to -0.1)   | 0.029  |
|               | 2009 - 2012 | 1.4 (0.3 to 2.5)      | 0.019  |
|               | 2012 - 2015 | 0.4 (-0.8 to 1.6)     | 0.522  |
|               | 2015 - 2021 | -1.2 (-1.4 to -0.9)   | <0.001 |
| Costa Rica    | 1990 - 1992 | -4.3 (-19.5 to 13.7)  | 0.599  |
|               | 1992 - 1996 | 10.4 (1.6 to 20)      | 0.022  |
|               | 1996 - 2004 | 1.6 (-0.4 to 3.7)     | 0.103  |
|               | 2004 - 2008 | -4.3 (-11.1 to 3.1)   | 0.23   |
|               | 2008 - 2021 | 2.5 (1.7 to 3.3)      | <0.001 |
| Côte d'Ivoire | 1990 - 1995 | 2.8 (2.1 to 3.4)      | <0.001 |
|               | 1995 - 1999 | 1.3 (-0.1 to 2.7)     | 0.062  |
|               | 1999 - 2006 | -0.6 (-1.1 to -0.1)   | 0.016  |
|               | 2006 - 2011 | -2.1 (-3 to -1.2)     | <0.001 |
|               | 2011 - 2014 | 3.8 (0.9 to 6.7)      | 0.014  |
|               | 2014 - 2017 | -1.6 (-4.3 to 1.2)    | 0.227  |
|               | 2017 - 2021 | -3 (-4.1 to -1.9)     | <0.001 |
| Croatia       | 1990 - 1992 | 17 (5.4 to 29.8)      | 0.005  |
|               | 1992 - 2005 | -3.6 (-4.2 to -2.9)   | <0.001 |
|               | 2005 - 2014 | -2 (-3.2 to -0.7)     | 0.003  |
|               | 2014 - 2021 | -5.9 (-7.9 to -3.8)   | <0.001 |
| Cuba          | 1990 - 1992 | -0.3 (-9.2 to 9.5)    | 0.948  |
|               | 1992 - 1999 | -7.5 (-9.1 to -5.8)   | <0.001 |
|               | 1999 - 2002 | -13.8 (-23.3 to -3.2) | 0.016  |
|               | 2002 - 2007 | -5.7 (-9.6 to -1.8)   | 0.008  |
|               | 2007 - 2010 | 4.8 (-7.8 to 19)      | 0.447  |
|               | 2010 - 2021 | -0.8 (-1.8 to 0.3)    | 0.146  |
| Cyprus        | 1990 - 1997 | 3.8 (2.1 to 5.5)      | <0.001 |
|               | 1997 - 2007 | -1.4 (-2.4 to -0.5)   | 0.006  |
|               | 2007 - 2013 | -3.9 (-6 to -1.9)     | 0.001  |
|               | 2013 - 2017 | 0.9 (-3.6 to 5.7)     | 0.686  |
|               | 2017 - 2021 | -6.2 (-9.5 to -2.9)   | 0.001  |
| Czechia       | 1990 - 1994 | 3.5 (0.4 to 6.8)      | 0.031  |
|               | 1994 - 2005 | -1.7 (-2.5 to -1)     | <0.001 |
|               | 2005 - 2012 | 0.7 (-0.9 to 2.3)     | 0.35   |
|               | 2012 - 2015 | -7.4 (-16.1 to 2.2)   | 0.118  |

|                                          |             |                       |        |
|------------------------------------------|-------------|-----------------------|--------|
|                                          | 2015 - 2018 | 0.5 (-9 to 11.1)      | 0.912  |
|                                          | 2018 - 2021 | -12.7 (-18.3 to -6.8) | 0.001  |
| Democratic People's<br>Republic of Korea | 1990 - 1994 | -1 (-1.4 to -0.7)     | <0.001 |
|                                          | 1994 - 2000 | -1.9 (-2.1 to -1.6)   | <0.001 |
|                                          | 2000 - 2005 | -3 (-3.4 to -2.7)     | <0.001 |
|                                          | 2005 - 2010 | 1 (0.7 to 1.3)        | <0.001 |
|                                          | 2010 - 2014 | -2.5 (-3 to -2)       | <0.001 |
|                                          | 2014 - 2021 | -0.8 (-0.9 to -0.6)   | <0.001 |
| Democratic Republic<br>of the Congo      | 1990 - 1994 | -2.2 (-3.6 to -0.8)   | 0.004  |
|                                          | 1994 - 2009 | -0.2 (-0.5 to 0)      | 0.046  |
|                                          | 2009 - 2015 | 1.3 (0.1 to 2.4)      | 0.034  |
|                                          | 2015 - 2021 | -0.6 (-1.5 to 0.3)    | 0.205  |
| Denmark                                  | 1990 - 2000 | -1.9 (-2.7 to -1)     | <0.001 |
|                                          | 2000 - 2007 | -5.4 (-7.3 to -3.6)   | <0.001 |
|                                          | 2007 - 2021 | -1.6 (-2.2 to -0.9)   | <0.001 |
| Djibouti                                 | 1990 - 2001 | 3 (1.8 to 4.1)        | <0.001 |
|                                          | 2001 - 2021 | -1 (-1.4 to -0.5)     | <0.001 |
| Dominica                                 | 1990 - 1993 | 0.7 (-0.1 to 1.5)     | 0.096  |
|                                          | 1993 - 1996 | -1.1 (-2.6 to 0.5)    | 0.177  |
|                                          | 1996 - 2005 | -2.1 (-2.3 to -1.9)   | <0.001 |
|                                          | 2005 - 2013 | 1.9 (1.7 to 2.1)      | <0.001 |
|                                          | 2013 - 2021 | 0.8 (0.6 to 1)        | <0.001 |
| Dominican Republic                       | 1990 - 2011 | 0.2 (0 to 0.5)        | 0.053  |
|                                          | 2011 - 2017 | 6.5 (4 to 9.1)        | <0.001 |
|                                          | 2017 - 2021 | -9.7 (-13.2 to -6)    | <0.001 |
| Ecuador                                  | 1990 - 2002 | 3.8 (3 to 4.7)        | <0.001 |
|                                          | 2002 - 2005 | 8.7 (-9.8 to 31.1)    | 0.362  |
|                                          | 2005 - 2019 | -0.6 (-1.4 to 0.3)    | 0.176  |
|                                          | 2019 - 2021 | -11.3 (-33.6 to 18.5) | 0.399  |
| Egypt                                    | 1990 - 1992 | -7.3 (-11.9 to -2.4)  | 0.007  |
|                                          | 1992 - 1995 | 2.3 (-2.5 to 7.4)     | 0.326  |
|                                          | 1995 - 2005 | -0.8 (-1.2 to -0.3)   | 0.002  |
|                                          | 2005 - 2010 | 1.9 (0.3 to 3.5)      | 0.022  |
|                                          | 2010 - 2015 | -0.2 (-1.7 to 1.3)    | 0.755  |
|                                          | 2015 - 2021 | -2.5 (-3.2 to -1.7)   | <0.001 |
| El Salvador                              | 1990 - 2013 | -2.4 (-2.7 to -2.1)   | <0.001 |
|                                          | 2013 - 2016 | 10.4 (-6.7 to 30.6)   | 0.237  |
|                                          | 2016 - 2021 | -8 (-12.4 to -3.3)    | 0.002  |
| Equatorial Guinea                        | 1990 - 1996 | -1.7 (-2.5 to -0.9)   | <0.001 |
|                                          | 1996 - 2002 | -4.8 (-5.9 to -3.6)   | <0.001 |
|                                          | 2002 - 2014 | -0.7 (-1.2 to -0.3)   | 0.002  |
|                                          | 2014 - 2021 | 2.6 (1.7 to 3.6)      | <0.001 |



|             |                     |                       |        |
|-------------|---------------------|-----------------------|--------|
| Eritrea     | 1990 - 1993         | -0.5 (-1.5 to 0.5)    | 0.325  |
|             | 1993 - 1996         | 2.8 (0.4 to 5.2)      | 0.023  |
|             | 1996 - 2001         | -1.4 (-2.1 to -0.6)   | 0.001  |
|             | 2001 - 2004         | 1.2 (-1.4 to 3.9)     | 0.342  |
|             | 2004 - 2021         | -0.6 (-0.7 to -0.5)   | <0.001 |
| Estonia     | 1990 - 1994         | 6.2 (2.2 to 10.3)     | 0.004  |
|             | 1994 - 2008         | -2.7 (-3.4 to -2.1)   | <0.001 |
|             | 2008 - 2011         | -8.7 (-17.9 to 1.6)   | 0.089  |
|             | 2011 - 2014         | 0.2 (-10 to 11.4)     | 0.974  |
|             | 2014 - 2017         | -12.4 (-22.6 to -0.8) | 0.038  |
| 2017 - 2021 | -1 (-5.6 to 3.9)    | 0.676                 |        |
| Eswatini    | 1990 - 1994         | 1.6 (1 to 2.2)        | <0.001 |
|             | 1994 - 1998         | 5.8 (4.8 to 6.8)      | <0.001 |
|             | 1998 - 2003         | 9 (8.4 to 9.7)        | <0.001 |
|             | 2003 - 2009         | 0.4 (-0.1 to 0.8)     | 0.115  |
|             | 2009 - 2021         | -1.9 (-2.1 to -1.8)   | <0.001 |
| Ethiopia    | 1990 - 1995         | -1.3 (-1.7 to -1)     | <0.001 |
|             | 1995 - 1998         | -2.9 (-4.1 to -1.8)   | <0.001 |
|             | 1998 - 2006         | -4.1 (-4.2 to -4)     | <0.001 |
|             | 2006 - 2010         | -3.1 (-3.6 to -2.7)   | <0.001 |
|             | 2010 - 2015         | -1.6 (-1.9 to -1.3)   | <0.001 |
| 2015 - 2021 | -0.1 (-0.3 to 0.1)  | 0.173                 |        |
| Fiji        | 1990 - 1998         | -1.8 (-2.4 to -1.2)   | <0.001 |
|             | 1998 - 2001         | 3.2 (-1.3 to 7.8)     | 0.157  |
|             | 2001 - 2009         | -1.8 (-2.3 to -1.3)   | <0.001 |
|             | 2009 - 2012         | 4.1 (0 to 8.4)        | 0.048  |
|             | 2012 - 2021         | -1.4 (-2 to -0.8)     | <0.001 |
| Finland     | 1990 - 1992         | -9.7 (-17 to -1.7)    | 0.021  |
|             | 1992 - 2007         | -1.9 (-2.3 to -1.5)   | <0.001 |
|             | 2007 - 2010         | 2.5 (-7 to 13)        | 0.597  |
|             | 2010 - 2015         | -6.4 (-8.9 to -3.7)   | <0.001 |
|             | 2015 - 2019         | 4.3 (-1 to 9.8)       | 0.107  |
| 2019 - 2021 | -5.3 (-17.1 to 8.1) | 0.392                 |        |
| France      | 1990 - 1993         | 3.7 (2 to 5.4)        | <0.001 |
|             | 1993 - 2000         | -5.3 (-5.8 to -4.8)   | <0.001 |
|             | 2000 - 2003         | -1 (-4.1 to 2.3)      | 0.528  |
|             | 2003 - 2007         | -3.9 (-5.3 to -2.3)   | <0.001 |
|             | 2007 - 2010         | 0.9 (-2.4 to 4.2)     | 0.569  |
|             | 2010 - 2016         | -5.6 (-6.3 to -4.9)   | <0.001 |
| 2016 - 2021 | -0.9 (-2.1 to 0.2)  | 0.11                  |        |
| Gabon       | 1990 - 1998         | 1.3 (0.5 to 2.1)      | 0.002  |
|             | 1998 - 2021         | -0.7 (-0.8 to -0.5)   | <0.001 |
| Gambia      | 1990 - 1999         | 2.2 (1.1 to 3.3)      | 0.001  |
|             | 1999 - 2002         | -3 (-13.6 to 9)       | 0.589  |

|           |             |                        |        |
|-----------|-------------|------------------------|--------|
|           | 2002 - 2005 | 7.8 (-3.4 to 20.3)     | 0.165  |
|           | 2005 - 2012 | -4.2 (-6.1 to -2.2)    | 0.001  |
|           | 2012 - 2017 | 5.4 (1.2 to 9.9)       | 0.015  |
|           | 2017 - 2021 | 0.5 (-3.2 to 4.2)      | 0.798  |
| Georgia   | 1990 - 1997 | 5.6 (3.8 to 7.4)       | <0.001 |
|           | 1997 - 2005 | -8.4 (-10.1 to -6.6)   | <0.001 |
|           | 2005 - 2009 | 12.9 (5.4 to 20.9)     | 0.001  |
|           | 2009 - 2021 | 0.2 (-0.6 to 1)        | 0.581  |
| Germany   | 1990 - 2001 | -1.9 (-2.2 to -1.6)    | <0.001 |
|           | 2001 - 2007 | -3.4 (-4.2 to -2.6)    | <0.001 |
|           | 2007 - 2010 | 2.1 (-1.7 to 6.2)      | 0.261  |
|           | 2010 - 2013 | -3.3 (-6.9 to 0.5)     | 0.08   |
|           | 2013 - 2016 | 1.2 (-2.2 to 4.8)      | 0.463  |
|           | 2016 - 2021 | -3.1 (-4.2 to -1.9)    | <0.001 |
| Ghana     | 1990 - 1995 | 0 (-0.5 to 0.6)        | 0.869  |
|           | 1995 - 2000 | 1 (0.4 to 1.6)         | 0.004  |
|           | 2000 - 2004 | 3.2 (2.3 to 4.2)       | <0.001 |
|           | 2004 - 2008 | -1.7 (-2.6 to -0.8)    | 0.001  |
|           | 2008 - 2017 | 1.7 (1.5 to 1.9)       | <0.001 |
|           | 2017 - 2021 | -2.9 (-3.7 to -2.2)    | <0.001 |
| Greece    | 1990 - 1992 | -7.1 (-16.7 to 3.6)    | 0.172  |
|           | 1992 - 1997 | 1.5 (-2.1 to 5.2)      | 0.408  |
|           | 1997 - 2008 | -2.3 (-3.2 to -1.4)    | <0.001 |
|           | 2008 - 2012 | 4.7 (-1.9 to 11.7)     | 0.159  |
|           | 2012 - 2021 | -0.6 (-1.8 to 0.7)     | 0.345  |
| Greenland | 1990 - 2000 | -4.8 (-5 to -4.6)      | <0.001 |
|           | 2000 - 2006 | -1.4 (-1.9 to -0.8)    | <0.001 |
|           | 2006 - 2012 | 0.1 (-0.4 to 0.6)      | 0.792  |
|           | 2012 - 2021 | -1.8 (-2 to -1.5)      | <0.001 |
| Grenada   | 1990 - 1994 | -6.3 (-8.5 to -4.1)    | <0.001 |
|           | 1994 - 2000 | -2.5 (-4 to -1)        | 0.003  |
|           | 2000 - 2008 | 2.1 (1.1 to 3.2)       | <0.001 |
|           | 2008 - 2014 | -6.1 (-7.6 to -4.6)    | <0.001 |
|           | 2014 - 2021 | 1 (-0.2 to 2.3)        | 0.095  |
| Guam      | 1990 - 1994 | 1.6 (-2 to 5.3)        | 0.365  |
|           | 1994 - 1999 | -5.4 (-8.3 to -2.5)    | 0.002  |
|           | 1999 - 2007 | -1.4 (-2.6 to -0.1)    | 0.033  |
|           | 2007 - 2012 | 7.3 (4.5 to 10.2)      | <0.001 |
|           | 2012 - 2015 | -5.7 (-13.7 to 3.1)    | 0.177  |
|           | 2015 - 2018 | 11.3 (-0.5 to 24.5)    | 0.06   |
|           | 2018 - 2021 | -15.7 (-20.7 to -10.4) | <0.001 |
| Guatemala | 1990 - 1998 | 0.9 (-0.6 to 2.3)      | 0.212  |
|           | 1998 - 2001 | 25.3 (9.8 to 42.9)     | 0.002  |
|           | 2001 - 2012 | -4.8 (-5.7 to -3.9)    | <0.001 |

|                         |             |                      |        |
|-------------------------|-------------|----------------------|--------|
|                         | 2012 - 2019 | 2.8 (0.9 to 4.8)     | 0.007  |
|                         | 2019 - 2021 | -11.5 (-26.3 to 6.3) | 0.178  |
| Guinea                  | 1990 - 2007 | 1.7 (1.6 to 1.8)     | <0.001 |
|                         | 2007 - 2015 | 0.5 (0.1 to 0.9)     | 0.018  |
|                         | 2015 - 2021 | -1.4 (-2 to -0.8)    | <0.001 |
| Guinea-Bissau           | 1990 - 1997 | 0.6 (0.4 to 0.9)     | <0.001 |
|                         | 1997 - 2002 | 1.5 (0.9 to 2.1)     | <0.001 |
|                         | 2002 - 2009 | 0.5 (0.1 to 0.8)     | 0.006  |
|                         | 2009 - 2018 | -0.9 (-1.1 to -0.7)  | <0.001 |
|                         | 2018 - 2021 | -1.9 (-2.8 to -1.1)  | <0.001 |
| Guyana                  | 1990 - 1995 | -4.7 (-7.5 to -1.8)  | 0.003  |
|                         | 1995 - 1999 | 12.1 (4.4 to 20.4)   | 0.004  |
|                         | 1999 - 2009 | -2.5 (-3.3 to -1.8)  | <0.001 |
|                         | 2009 - 2014 | 6.1 (3.3 to 9)       | <0.001 |
|                         | 2014 - 2021 | -1.6 (-3.4 to 0.2)   | 0.076  |
| Haiti                   | 1990 - 2021 | -0.5 (-0.7 to -0.3)  | <0.001 |
| Honduras                | 1990 - 1997 | -1.3 (-1.5 to -1.2)  | <0.001 |
|                         | 1997 - 2003 | -0.4 (-0.8 to 0)     | 0.05   |
|                         | 2003 - 2009 | -2.9 (-3.3 to -2.5)  | <0.001 |
|                         | 2009 - 2012 | -6.5 (-8.4 to -4.5)  | <0.001 |
|                         | 2012 - 2021 | -0.5 (-0.7 to -0.3)  | <0.001 |
| Hungary                 | 1990 - 1997 | -3 (-4.1 to -1.9)    | <0.001 |
|                         | 1997 - 2000 | 1 (-6.9 to 9.6)      | 0.8    |
|                         | 2000 - 2006 | -5.6 (-7.3 to -3.8)  | <0.001 |
|                         | 2006 - 2009 | 4.5 (-3.4 to 13)     | 0.255  |
|                         | 2009 - 2021 | -3.3 (-3.9 to -2.7)  | <0.001 |
| Iceland                 | 1990 - 1995 | -6 (-8.4 to -3.5)    | <0.001 |
|                         | 1995 - 2000 | 2.4 (-1.2 to 6.2)    | 0.181  |
|                         | 2000 - 2012 | -3.2 (-4 to -2.5)    | <0.001 |
|                         | 2012 - 2015 | 3.2 (-8 to 15.7)     | 0.567  |
|                         | 2015 - 2019 | -6.7 (-12.7 to -0.2) | 0.044  |
|                         | 2019 - 2021 | 7.5 (-8.2 to 26)     | 0.344  |
| India                   | 1990 - 1996 | -0.6 (-2 to 0.7)     | 0.339  |
|                         | 1996 - 1999 | 2.8 (-4.3 to 10.5)   | 0.418  |
|                         | 1999 - 2002 | -4.9 (-10.8 to 1.3)  | 0.111  |
|                         | 2002 - 2005 | 1.2 (-3.9 to 6.6)    | 0.612  |
|                         | 2005 - 2012 | -2.3 (-3.2 to -1.3)  | <0.001 |
|                         | 2012 - 2019 | -5.3 (-6.2 to -4.5)  | <0.001 |
|                         | 2019 - 2021 | 3 (-3 to 9.4)        | 0.299  |
| Indonesia               | 1990 - 2003 | 0.3 (0.2 to 0.4)     | <0.001 |
|                         | 2003 - 2011 | -1.1 (-1.4 to -0.9)  | <0.001 |
|                         | 2011 - 2014 | 0.2 (-1.4 to 1.9)    | 0.765  |
|                         | 2014 - 2021 | -1 (-1.2 to -0.8)    | <0.001 |
| Iran (Islamic Republic) | 1990 - 1996 | -1.1 (-1.6 to -0.6)  | <0.001 |

|         |             |                        |        |
|---------|-------------|------------------------|--------|
| of)     | 1996 - 2002 | 0.8 (0.2 to 1.3)       | 0.007  |
|         | 2002 - 2006 | -1.1 (-2 to -0.1)      | 0.029  |
|         | 2006 - 2010 | 0.6 (-0.3 to 1.4)      | 0.173  |
|         | 2010 - 2019 | -3.5 (-3.7 to -3.3)    | <0.001 |
|         | 2019 - 2021 | -6 (-7.8 to -4.2)      | <0.001 |
| Iraq    | 1990 - 1996 | 1.7 (1.3 to 2)         | <0.001 |
|         | 1996 - 2005 | -2.1 (-2.3 to -1.9)    | <0.001 |
|         | 2005 - 2008 | -3.8 (-5.8 to -1.7)    | 0.001  |
|         | 2008 - 2017 | -0.8 (-1 to -0.6)      | <0.001 |
|         | 2017 - 2021 | -3.8 (-4.4 to -3.2)    | <0.001 |
| Ireland | 1990 - 1993 | 2.7 (-0.5 to 6)        | 0.095  |
|         | 1993 - 1997 | 10.9 (7.8 to 14)       | <0.001 |
|         | 1997 - 2006 | -0.7 (-1.3 to -0.2)    | 0.013  |
|         | 2006 - 2011 | -3.6 (-5.1 to -2.2)    | <0.001 |
|         | 2011 - 2014 | -11.3 (-15.8 to -6.6)  | <0.001 |
|         | 2014 - 2021 | -6.2 (-7.4 to -5)      | <0.001 |
| Israel  | 1990 - 1997 | 4.6 (2.8 to 6.5)       | <0.001 |
|         | 1997 - 2009 | -3.9 (-4.8 to -3.1)    | <0.001 |
|         | 2009 - 2012 | -10.1 (-20.5 to 1.8)   | 0.09   |
|         | 2012 - 2021 | -0.9 (-2.4 to 0.6)     | 0.217  |
| Italy   | 1990 - 1997 | 3.6 (2.3 to 4.9)       | <0.001 |
|         | 1997 - 2005 | -6.4 (-7.6 to -5.3)    | <0.001 |
|         | 2005 - 2017 | 0.2 (-0.5 to 0.9)      | 0.497  |
|         | 2017 - 2021 | -6.3 (-10.1 to -2.5)   | 0.003  |
| Jamaica | 1990 - 2000 | 2.5 (0.9 to 4.2)       | 0.004  |
|         | 2000 - 2006 | -11.4 (-13.5 to -9.2)  | <0.001 |
|         | 2006 - 2009 | 22.6 (5.4 to 42.6)     | 0.011  |
|         | 2009 - 2014 | -4.4 (-7.8 to -0.9)    | 0.017  |
|         | 2014 - 2021 | 2.2 (-0.6 to 5.1)      | 0.115  |
| Japan   | 1990 - 1996 | 2.8 (1.7 to 4)         | <0.001 |
|         | 1996 - 1999 | 9.6 (3.8 to 15.6)      | 0.003  |
|         | 1999 - 2002 | -2.6 (-7.6 to 2.7)     | 0.3    |
|         | 2002 - 2006 | 5.4 (2.7 to 8.1)       | 0.001  |
|         | 2006 - 2011 | 0.7 (-0.7 to 2.1)      | 0.325  |
|         | 2011 - 2016 | -3.7 (-5 to -2.4)      | <0.001 |
|         | 2016 - 2021 | 2.5 (1.3 to 3.7)       | 0.001  |
| Jordan  | 1990 - 1999 | 0.4 (0 to 0.8)         | 0.029  |
|         | 1999 - 2004 | -3 (-4.2 to -1.7)      | <0.001 |
|         | 2004 - 2009 | -11.4 (-12.2 to -10.6) | <0.001 |
|         | 2009 - 2012 | -4.2 (-6.7 to -1.6)    | 0.004  |
|         | 2012 - 2015 | -1.3 (-4.1 to 1.6)     | 0.344  |
|         | 2015 - 2018 | -5 (-7.9 to -2)        | 0.004  |
|         | 2018 - 2021 | -0.4 (-2.1 to 1.5)     | 0.68   |

|                                     |             |                        |        |
|-------------------------------------|-------------|------------------------|--------|
| Kazakhstan                          | 1990 - 1993 | 14.2 (8.2 to 20.5)     | <0.001 |
|                                     | 1993 - 2007 | 2.1 (1.6 to 2.7)       | <0.001 |
|                                     | 2007 - 2021 | -6.9 (-7.4 to -6.5)    | <0.001 |
| Kenya                               | 1990 - 1996 | -0.7 (-1.1 to -0.3)    | 0.001  |
|                                     | 1996 - 1999 | 0.9 (-1.4 to 3.2)      | 0.411  |
|                                     | 1999 - 2004 | 3.3 (2.6 to 4)         | <0.001 |
|                                     | 2004 - 2011 | 0.6 (0.4 to 0.9)       | <0.001 |
|                                     | 2011 - 2015 | -1.8 (-2.5 to -1.1)    | <0.001 |
|                                     | 2015 - 2021 | -1 (-1.3 to -0.7)      | <0.001 |
| Kiribati                            | 1990 - 1993 | -0.3 (-0.6 to -0.1)    | 0.015  |
|                                     | 1993 - 1998 | -0.9 (-1 to -0.7)      | <0.001 |
|                                     | 1998 - 2002 | -0.6 (-0.8 to -0.4)    | <0.001 |
|                                     | 2002 - 2005 | 0.2 (-0.3 to 0.7)      | 0.461  |
|                                     | 2005 - 2011 | 1.1 (1 to 1.2)         | <0.001 |
|                                     | 2011 - 2015 | -0.9 (-1.2 to -0.6)    | <0.001 |
|                                     | 2015 - 2021 | -1.2 (-1.3 to -1.1)    | <0.001 |
| Kuwait                              | 1990 - 1998 | 6.4 (3.5 to 9.3)       | <0.001 |
|                                     | 1998 - 2002 | 16.3 (4 to 30.1)       | 0.011  |
|                                     | 2002 - 2005 | -8.7 (-24.9 to 11.1)   | 0.344  |
|                                     | 2005 - 2008 | -33.1 (-46.7 to -16.1) | 0.002  |
|                                     | 2008 - 2021 | 5 (3.4 to 6.6)         | <0.001 |
| Kyrgyzstan                          | 1990 - 2001 | 1.2 (0.7 to 1.7)       | <0.001 |
|                                     | 2001 - 2004 | -7.7 (-13.7 to -1.2)   | 0.023  |
|                                     | 2004 - 2011 | 1.6 (0.5 to 2.8)       | 0.007  |
|                                     | 2011 - 2021 | -4.1 (-4.7 to -3.4)    | <0.001 |
| Lao People's<br>Democratic Republic | 1990 - 1995 | -1 (-1.8 to -0.1)      | 0.025  |
|                                     | 1995 - 2006 | -2.2 (-2.5 to -2)      | <0.001 |
|                                     | 2006 - 2021 | -1.5 (-1.7 to -1.4)    | <0.001 |
| Latvia                              | 1990 - 1994 | 8.9 (6.5 to 11.3)      | <0.001 |
|                                     | 1994 - 2003 | -4.4 (-5.1 to -3.7)    | <0.001 |
|                                     | 2003 - 2012 | -0.9 (-1.7 to 0)       | 0.041  |
|                                     | 2012 - 2021 | -6.4 (-7.2 to -5.6)    | <0.001 |
| Lebanon                             | 1990 - 2003 | -3.5 (-3.7 to -3.4)    | <0.001 |
|                                     | 2003 - 2010 | -0.2 (-0.6 to 0.1)     | 0.171  |
|                                     | 2010 - 2015 | 1.7 (1 to 2.4)         | <0.001 |
|                                     | 2015 - 2018 | -6.7 (-8.6 to -4.8)    | <0.001 |
|                                     | 2018 - 2021 | -2.7 (-3.7 to -1.6)    | <0.001 |
| Lesotho                             | 1990 - 1993 | -2.5 (-4.1 to -0.8)    | 0.007  |
|                                     | 1993 - 1997 | 2.1 (0.5 to 3.7)       | 0.014  |
|                                     | 1997 - 2000 | 12.5 (9.1 to 15.9)     | <0.001 |
|                                     | 2000 - 2005 | 7.5 (6.6 to 8.4)       | <0.001 |
|                                     | 2005 - 2015 | 1 (0.8 to 1.2)         | <0.001 |
|                                     | 2015 - 2021 | 0 (-0.4 to 0.5)        | 0.832  |

|             |             |                      |                  |
|-------------|-------------|----------------------|------------------|
| Liberia     | 1990 - 1992 | -7.8 (-15.1 to 0.1)  | 0.052            |
|             | 1992 - 1999 | 3.9 (2.2 to 5.6)     | <0.001           |
|             | 1999 - 2006 | -0.8 (-2.8 to 1.3)   | 0.434            |
|             | 2006 - 2013 | 4.3 (2.1 to 6.5)     | 0.001            |
|             | 2013 - 2021 | -2.2 (-3.5 to -0.9)  | 0.003            |
| Libya       | 1990 - 1996 | -0.3 (-1.3 to 0.6)   | 0.464            |
|             | 1996 - 2003 | 2.2 (1.3 to 3.2)     | <0.001           |
|             | 2003 - 2006 | -7.2 (-11.7 to -2.5) | 0.006            |
|             | 2006 - 2010 | 9 (6.3 to 11.9)      | <0.001           |
|             | 2010 - 2021 | -0.8 (-1.2 to -0.4)  | 0.001            |
| Lithuania   | 1990 - 1994 | 14.8 (9.5 to 20.3)   | <0.001           |
|             | 1994 - 2014 | -0.7 (-1.1 to -0.3)  | 0.001            |
|             | 2014 - 2017 | -14 (-26.1 to 0.1)   | 0.051            |
|             | 2017 - 2021 | -3.9 (-10.3 to 2.9)  | 0.239            |
| Luxembourg  | 1990 - 1994 | -0.9 (-6.1 to 4.5)   | 0.711            |
|             | 1994 - 1998 | -9.9 (-16 to -3.4)   | 0.007            |
|             | 1998 - 2005 | -2.5 (-4.9 to 0)     | 0.049            |
|             | 2005 - 2008 | -11.1 (-24.5 to 4.6) | 0.142            |
|             | 2008 - 2011 | 2.3 (-11.3 to 17.9)  | 0.739            |
|             | 2011 - 2015 | -9.7 (-16.1 to -2.8) | 0.011            |
| Madagascar  | 2015 - 2021 | 1.7 (-1.2 to 4.7)    | 0.221            |
|             | 1990 - 2006 | -0.9 (-1 to -0.8)    | <0.001           |
|             | 2006 - 2021 | 0.2 (0 to 0.3)       | 0.015            |
|             | Malawi      | 1990 - 2000          | 1.6 (1.4 to 1.8) |
| 2000 - 2004 |             | -0.4 (-1.7 to 1)     | 0.584            |
| 2004 - 2008 |             | -2.5 (-3.8 to -1.3)  | 0.001            |
| 2008 - 2011 |             | -0.8 (-3.1 to 1.6)   | 0.489            |
| 2011 - 2014 |             | -2.4 (-4.8 to 0.1)   | 0.06             |
| 2014 - 2021 |             | -0.3 (-0.6 to 0.1)   | 0.194            |
| Malaysia    | 1990 - 2009 | -2.3 (-3 to -1.7)    | <0.001           |
|             | 2009 - 2021 | -0.1 (-1.5 to 1.3)   | 0.849            |
| Maldives    | 1990 - 1997 | -5.3 (-6.1 to -4.5)  | <0.001           |
|             | 1997 - 2000 | 8.6 (2 to 15.7)      | 0.013            |
|             | 2000 - 2006 | -4.2 (-5.5 to -2.8)  | <0.001           |
|             | 2006 - 2014 | -0.4 (-1.2 to 0.4)   | 0.271            |
|             | 2014 - 2021 | -3.7 (-4.6 to -2.8)  | <0.001           |
| Mali        | 1990 - 1996 | 0.4 (0 to 0.8)       | 0.031            |
|             | 1996 - 1999 | -1.1 (-3.4 to 1.2)   | 0.316            |
|             | 1999 - 2002 | 1.2 (-1.2 to 3.7)    | 0.299            |
|             | 2002 - 2006 | -0.7 (-1.9 to 0.5)   | 0.225            |
|             | 2006 - 2017 | 0.5 (0.3 to 0.7)     | <0.001           |
| Malta       | 2017 - 2021 | -1.3 (-2 to -0.5)    | 0.003            |
|             | 1990 - 2013 | -0.7 (-1.1 to -0.3)  | 0.001            |
|             | 2013 - 2019 | -7.9 (-11.4 to -4.2) | <0.001           |

|                                  |             |                     |        |
|----------------------------------|-------------|---------------------|--------|
|                                  | 2019 - 2021 | 24.3 (1.8 to 51.7)  | 0.034  |
| Marshall Islands                 | 1990 - 1995 | -5.4 (-7.2 to -3.6) | <0.001 |
|                                  | 1995 - 2005 | 1.6 (0.8 to 2.3)    | <0.001 |
|                                  | 2005 - 2021 | -0.7 (-1 to -0.4)   | <0.001 |
| Mauritania                       | 1990 - 2018 | -0.9 (-0.9 to -0.8) | <0.001 |
|                                  | 2018 - 2021 | 1.4 (-1.3 to 4.2)   | 0.301  |
| Mauritius                        | 1990 - 1997 | -1.1 (-2.6 to 0.4)  | 0.129  |
|                                  | 1997 - 2004 | -9 (-10.9 to -7.2)  | <0.001 |
|                                  | 2004 - 2021 | 1.9 (1.3 to 2.4)    | <0.001 |
| Mexico                           | 1990 - 1993 | 4 (1.2 to 7)        | 0.008  |
|                                  | 1993 - 1997 | 8.1 (5.6 to 10.6)   | <0.001 |
|                                  | 1997 - 2007 | 0.5 (0.1 to 1)      | 0.02   |
|                                  | 2007 - 2011 | 7.3 (4.9 to 9.7)    | <0.001 |
|                                  | 2011 - 2021 | 1 (0.5 to 1.4)      | <0.001 |
| Micronesia (Federated States of) | 1990 - 1993 | 0 (-0.3 to 0.4)     | 0.977  |
|                                  | 1993 - 1999 | -0.8 (-1 to -0.7)   | <0.001 |
|                                  | 1999 - 2002 | -1.6 (-2.2 to -0.9) | <0.001 |
|                                  | 2002 - 2021 | -0.2 (-0.2 to -0.1) | <0.001 |
| Monaco                           | 1990 - 1999 | -0.2 (-0.3 to -0.1) | 0.004  |
|                                  | 1999 - 2008 | -1.5 (-1.6 to -1.4) | <0.001 |
|                                  | 2008 - 2012 | -0.9 (-1.3 to -0.4) | 0.001  |
|                                  | 2012 - 2017 | -1.8 (-2.1 to -1.5) | <0.001 |
|                                  | 2017 - 2021 | 0 (-0.4 to 0.3)     | 0.88   |
| Mongolia                         | 1990 - 1994 | 8.1 (2.6 to 14)     | 0.006  |
|                                  | 1994 - 2001 | -5.7 (-8.4 to -3)   | <0.001 |
|                                  | 2001 - 2008 | 2.3 (-0.1 to 4.8)   | 0.059  |
|                                  | 2008 - 2011 | 10.2 (-3.8 to 26.3) | 0.15   |
|                                  | 2011 - 2021 | -5.2 (-6.2 to -4.2) | <0.001 |
| Montenegro                       | 1990 - 1996 | -3.7 (-7.1 to -0.1) | 0.044  |
|                                  | 1996 - 1999 | 23.7 (1.7 to 50.5)  | 0.035  |
|                                  | 1999 - 2002 | -13 (-27.4 to 4.2)  | 0.122  |
|                                  | 2002 - 2005 | 3.5 (-12.8 to 22.9) | 0.675  |
|                                  | 2005 - 2021 | -3.1 (-3.8 to -2.3) | <0.001 |
| Morocco                          | 1990 - 1993 | 1 (0.3 to 1.6)      | 0.005  |
|                                  | 1993 - 2002 | -0.5 (-0.7 to -0.4) | <0.001 |
|                                  | 2002 - 2009 | -1.8 (-2.1 to -1.6) | <0.001 |
|                                  | 2009 - 2014 | -3.1 (-3.5 to -2.7) | <0.001 |
|                                  | 2014 - 2018 | -4.2 (-4.8 to -3.6) | <0.001 |
|                                  | 2018 - 2021 | -1.8 (-2.4 to -1.1) | <0.001 |
| Mozambique                       | 1990 - 1993 | -0.9 (-1.8 to 0)    | 0.055  |
|                                  | 1993 - 1997 | 2.2 (1.3 to 3.2)    | <0.001 |
|                                  | 1997 - 2003 | 0.6 (0.2 to 1.1)    | 0.006  |
|                                  | 2003 - 2009 | 3.8 (3.4 to 4.2)    | <0.001 |

|             |             |                      |        |
|-------------|-------------|----------------------|--------|
|             | 2009 - 2015 | 1.1 (0.7 to 1.5)     | <0.001 |
|             | 2015 - 2021 | -1.6 (-1.9 to -1.3)  | <0.001 |
| Myanmar     | 1990 - 1998 | -0.3 (-0.6 to 0)     | 0.092  |
|             | 1998 - 2005 | -1.7 (-2.2 to -1.3)  | <0.001 |
|             | 2005 - 2011 | -4.5 (-5 to -4)      | <0.001 |
|             | 2011 - 2021 | -0.9 (-1.1 to -0.7)  | <0.001 |
| Namibia     | 1990 - 1997 | 1.9 (1.6 to 2.2)     | <0.001 |
|             | 1997 - 2000 | 4 (1.4 to 6.7)       | 0.005  |
|             | 2000 - 2003 | 1.6 (-0.9 to 4.2)    | 0.195  |
|             | 2003 - 2012 | -2.1 (-2.4 to -1.9)  | <0.001 |
|             | 2012 - 2015 | 0.9 (-2.1 to 4)      | 0.544  |
|             | 2015 - 2021 | -1.4 (-2 to -0.8)    | <0.001 |
| Nauru       | 1990 - 1994 | 0.4 (0 to 0.8)       | 0.043  |
|             | 1994 - 1999 | 2.1 (1.7 to 2.5)     | <0.001 |
|             | 1999 - 2004 | 0.8 (0.4 to 1.3)     | 0.001  |
|             | 2004 - 2009 | -0.4 (-0.8 to 0.1)   | 0.085  |
|             | 2009 - 2018 | -2.1 (-2.3 to -2)    | <0.001 |
|             | 2018 - 2021 | -0.7 (-1.4 to -0.1)  | 0.024  |
| Nepal       | 1990 - 1994 | -0.5 (-1 to 0)       | 0.044  |
|             | 1994 - 1999 | -1.6 (-2 to -1.1)    | <0.001 |
|             | 1999 - 2002 | -2.4 (-3.6 to -1.2)  | <0.001 |
|             | 2002 - 2009 | 0.4 (0.2 to 0.6)     | 0.001  |
|             | 2009 - 2021 | -1 (-1 to -0.9)      | <0.001 |
| Netherlands | 1990 - 1997 | -0.6 (-1.8 to 0.6)   | 0.299  |
|             | 1997 - 2003 | -4 (-6 to -1.9)      | 0.001  |
|             | 2003 - 2009 | -0.7 (-2.8 to 1.4)   | 0.458  |
|             | 2009 - 2012 | 4.6 (-3.3 to 13.1)   | 0.237  |
|             | 2012 - 2015 | -3.7 (-10.4 to 3.6)  | 0.287  |
|             | 2015 - 2018 | 6.4 (-2.1 to 15.6)   | 0.133  |
|             | 2018 - 2021 | -2.5 (-7.4 to 2.7)   | 0.305  |
| New Zealand | 1990 - 1996 | 2.6 (0.9 to 4.3)     | 0.005  |
|             | 1996 - 2002 | -6.5 (-8.4 to -4.5)  | <0.001 |
|             | 2002 - 2012 | 0.6 (-0.2 to 1.4)    | 0.116  |
|             | 2012 - 2015 | -4.7 (-11.9 to 3.2)  | 0.221  |
|             | 2015 - 2018 | 2.8 (-6.2 to 12.6)   | 0.536  |
|             | 2018 - 2021 | -5.7 (-11.4 to 0.4)  | 0.066  |
| Nicaragua   | 1990 - 1996 | 9.5 (8.2 to 10.9)    | <0.001 |
|             | 1996 - 2000 | 2.4 (-1.2 to 6.2)    | 0.187  |
|             | 2000 - 2018 | -1.8 (-2.1 to -1.5)  | <0.001 |
|             | 2018 - 2021 | -9.3 (-13.2 to -5.4) | <0.001 |
| Niger       | 1990 - 2003 | 0.1 (-0.1 to 0.3)    | 0.181  |
|             | 2003 - 2010 | -2.3 (-3 to -1.6)    | <0.001 |
|             | 2010 - 2014 | 2.6 (0.2 to 5)       | 0.035  |
|             | 2014 - 2021 | -0.4 (-1.1 to 0.3)   | 0.244  |



|                          |             |                        |        |
|--------------------------|-------------|------------------------|--------|
| Nigeria                  | 1990 - 2001 | 1 (0.9 to 1.1)         | <0.001 |
|                          | 2001 - 2008 | -1.9 (-2.1 to -1.6)    | <0.001 |
|                          | 2008 - 2014 | 0.3 (0 to 0.7)         | 0.066  |
|                          | 2014 - 2021 | -1.9 (-2.1 to -1.7)    | <0.001 |
| Niue                     | 1990 - 2018 | -0.7 (-1 to -0.4)      | <0.001 |
|                          | 2018 - 2021 | 19.7 (11.5 to 28.6)    | <0.001 |
| North Macedonia          | 1990 - 1999 | 1.8 (0.6 to 3)         | 0.005  |
|                          | 1999 - 2021 | -2.5 (-2.9 to -2.2)    | <0.001 |
| Northern Mariana Islands | 1990 - 1999 | -5.1 (-7.8 to -2.4)    | 0.001  |
|                          | 1999 - 2021 | 1.8 (1.2 to 2.5)       | <0.001 |
| Norway                   | 1990 - 2007 | -2.8 (-3.3 to -2.3)    | <0.001 |
|                          | 2007 - 2010 | 3.2 (-10.1 to 18.6)    | 0.639  |
|                          | 2010 - 2013 | -7.6 (-19.7 to 6.4)    | 0.257  |
|                          | 2013 - 2021 | 1.2 (-0.6 to 2.9)      | 0.177  |
| Oman                     | 1990 - 2008 | -0.6 (-1 to -0.1)      | 0.01   |
|                          | 2008 - 2017 | 4.5 (3.1 to 5.8)       | <0.001 |
|                          | 2017 - 2021 | -19.1 (-22.4 to -15.7) | <0.001 |
| Pakistan                 | 1990 - 1995 | 3.9 (3.6 to 4.2)       | <0.001 |
|                          | 1995 - 2003 | 0.9 (0.7 to 1.1)       | <0.001 |
|                          | 2003 - 2011 | -1.5 (-1.7 to -1.3)    | <0.001 |
|                          | 2011 - 2015 | 0.6 (-0.3 to 1.4)      | 0.187  |
|                          | 2015 - 2021 | -1.8 (-2 to -1.5)      | <0.001 |
| Palau                    | 1990 - 1995 | 2.6 (0.9 to 4.4)       | 0.005  |
|                          | 1995 - 2014 | 0.2 (0 to 0.4)         | 0.092  |
|                          | 2014 - 2021 | -1.6 (-2.3 to -0.9)    | <0.001 |
| Palestine                | 1990 - 2003 | -0.7 (-0.8 to -0.5)    | <0.001 |
|                          | 2003 - 2007 | -3.8 (-4.8 to -2.7)    | <0.001 |
|                          | 2007 - 2010 | -9.1 (-11.1 to -7.1)   | <0.001 |
|                          | 2010 - 2014 | 18.4 (17.2 to 19.6)    | <0.001 |
|                          | 2014 - 2017 | -9.2 (-10.7 to -7.6)   | <0.001 |
|                          | 2017 - 2021 | -0.3 (-1 to 0.3)       | 0.306  |
| Panama                   | 1990 - 1998 | 4.5 (3.3 to 5.8)       | <0.001 |
|                          | 1998 - 2008 | 0.4 (-0.4 to 1.3)      | 0.297  |
|                          | 2008 - 2021 | -1.9 (-2.5 to -1.3)    | <0.001 |
| Papua New Guinea         | 1990 - 2002 | 0.4 (-0.2 to 1)        | 0.155  |
|                          | 2002 - 2006 | -2.5 (-8.1 to 3.5)     | 0.387  |
|                          | 2006 - 2021 | 1.4 (0.9 to 1.9)       | <0.001 |
| Paraguay                 | 1990 - 1995 | 7.3 (5.8 to 8.9)       | <0.001 |
|                          | 1995 - 1998 | -0.9 (-6.8 to 5.4)     | 0.764  |
|                          | 1998 - 2004 | 4.3 (2.5 to 6.1)       | <0.001 |
|                          | 2004 - 2019 | 1.4 (1 to 1.8)         | <0.001 |
|                          | 2019 - 2021 | -8.9 (-17.7 to 0.8)    | 0.069  |
| Peru                     | 1990 - 1994 | 3.7 (1.5 to 6.1)       | 0.004  |

|                     |             |                        |        |
|---------------------|-------------|------------------------|--------|
|                     | 1994 - 1998 | 0.2 (-2.8 to 3.4)      | 0.878  |
|                     | 1998 - 2006 | -2.2 (-3.2 to -1.2)    | <0.001 |
|                     | 2006 - 2011 | 1.7 (-0.9 to 4.4)      | 0.187  |
|                     | 2011 - 2016 | -3.1 (-5.7 to -0.3)    | 0.03   |
|                     | 2016 - 2019 | 8.6 (-1.3 to 19.4)     | 0.084  |
|                     | 2019 - 2021 | -11 (-20 to -0.9)      | 0.036  |
| Philippines         | 1990 - 1997 | -3.6 (-4.4 to -2.8)    | <0.001 |
|                     | 1997 - 2021 | 0.3 (0.2 to 0.4)       | <0.001 |
| Poland              | 1990 - 1994 | 0.9 (-1.2 to 3.1)      | 0.361  |
|                     | 1994 - 1999 | 3.5 (1.6 to 5.4)       | 0.001  |
|                     | 1999 - 2014 | 0.3 (0 to 0.5)         | 0.024  |
|                     | 2014 - 2017 | -7.3 (-11.8 to -2.6)   | 0.005  |
|                     | 2017 - 2021 | -3 (-5.4 to -0.4)      | 0.025  |
| Portugal            | 1990 - 2001 | -3.5 (-4.1 to -2.9)    | <0.001 |
|                     | 2001 - 2004 | -14.3 (-23 to -4.6)    | 0.007  |
|                     | 2004 - 2009 | 1.5 (-1.7 to 4.7)      | 0.339  |
|                     | 2009 - 2013 | -6.2 (-10.3 to -1.8)   | 0.008  |
|                     | 2013 - 2021 | -1.1 (-2.3 to 0.2)     | 0.094  |
| Puerto Rico         | 1990 - 1995 | 2.5 (-0.3 to 5.4)      | 0.078  |
|                     | 1995 - 2012 | -2.9 (-3.4 to -2.3)    | <0.001 |
|                     | 2012 - 2021 | -4.8 (-6.4 to -3.1)    | <0.001 |
| Qatar               | 1990 - 1995 | -2.4 (-4.5 to -0.3)    | 0.029  |
|                     | 1995 - 2001 | 7 (4.7 to 9.2)         | <0.001 |
|                     | 2001 - 2018 | -2.8 (-3.2 to -2.4)    | <0.001 |
|                     | 2018 - 2021 | -16.6 (-21.4 to -11.4) | <0.001 |
| Republic of Korea   | 1990 - 1997 | 1.1 (-0.6 to 2.8)      | 0.186  |
|                     | 1997 - 2001 | -4.8 (-7.2 to -2.4)    | 0.001  |
|                     | 2001 - 2006 | 1.4 (0.4 to 2.5)       | 0.013  |
|                     | 2006 - 2009 | 4.6 (-0.8 to 10.2)     | 0.087  |
|                     | 2009 - 2015 | -3 (-4.3 to -1.8)      | <0.001 |
|                     | 2015 - 2019 | 3 (-0.1 to 6.1)        | 0.053  |
|                     | 2019 - 2021 | -3 (-9.1 to 3.5)       | 0.326  |
| Republic of Moldova | 1990 - 1994 | 2.7 (-0.2 to 5.6)      | 0.069  |
|                     | 1994 - 2006 | -1.9 (-2.5 to -1.3)    | <0.001 |
|                     | 2006 - 2010 | 7.5 (2.6 to 12.6)      | 0.004  |
|                     | 2010 - 2016 | -3.2 (-5.2 to -1.2)    | 0.004  |
|                     | 2016 - 2021 | -7.6 (-10.1 to -5.2)   | <0.001 |
| Romania             | 1990 - 1994 | 4.2 (0.9 to 7.7)       | 0.016  |
|                     | 1994 - 2007 | -0.3 (-0.9 to 0.3)     | 0.302  |
|                     | 2007 - 2010 | 8 (-2.9 to 20.2)       | 0.147  |
|                     | 2010 - 2021 | -5.7 (-6.6 to -4.9)    | <0.001 |
| Russian Federation  | 1990 - 1994 | 15.2 (11.4 to 19)      | <0.001 |
|                     | 1994 - 2005 | 1.4 (0.6 to 2.2)       | 0.001  |
|                     | 2005 - 2012 | -3.4 (-4.9 to -1.9)    | <0.001 |

|                                  |             |                      |        |
|----------------------------------|-------------|----------------------|--------|
|                                  | 2012 - 2021 | -10 (-11.3 to -8.7)  | <0.001 |
| Rwanda                           | 1990 - 1993 | 6.9 (5.2 to 8.6)     | <0.001 |
|                                  | 1993 - 1996 | -5 (-8.4 to -1.6)    | 0.007  |
|                                  | 1996 - 1999 | -0.8 (-4.1 to 2.6)   | 0.624  |
|                                  | 1999 - 2010 | -5.6 (-5.9 to -5.4)  | <0.001 |
|                                  | 2010 - 2021 | -1.1 (-1.4 to -0.8)  | <0.001 |
| Saint Kitts and Nevis            | 1990 - 1996 | 2.7 (0.6 to 4.8)     | 0.012  |
|                                  | 1996 - 2002 | -6.9 (-9.9 to -3.8)  | <0.001 |
|                                  | 2002 - 2021 | -0.8 (-1.3 to -0.3)  | 0.006  |
| Saint Lucia                      | 1990 - 2001 | -0.6 (-1.1 to -0.2)  | 0.006  |
|                                  | 2001 - 2006 | -2.9 (-5.1 to -0.7)  | 0.012  |
|                                  | 2006 - 2012 | 3.5 (1.9 to 5.1)     | <0.001 |
|                                  | 2012 - 2021 | -2.3 (-3.2 to -1.4)  | <0.001 |
| Saint Vincent and the Grenadines | 1990 - 2002 | 0.6 (0.1 to 1.1)     | 0.019  |
|                                  | 2002 - 2006 | -3.6 (-7.8 to 0.6)   | 0.09   |
|                                  | 2006 - 2009 | 3.2 (-5.5 to 12.8)   | 0.46   |
|                                  | 2009 - 2012 | -4 (-11.9 to 4.5)    | 0.324  |
|                                  | 2012 - 2021 | -0.2 (-1.1 to 0.7)   | 0.612  |
| Samoa                            | 1990 - 1995 | -0.9 (-1.1 to -0.7)  | <0.001 |
|                                  | 1995 - 2000 | -2.2 (-2.4 to -1.9)  | <0.001 |
|                                  | 2000 - 2003 | -3 (-3.8 to -2.1)    | <0.001 |
|                                  | 2003 - 2007 | -1 (-1.4 to -0.5)    | <0.001 |
|                                  | 2007 - 2016 | 1.4 (1.3 to 1.5)     | <0.001 |
|                                  | 2016 - 2021 | -1.2 (-1.4 to -1)    | <0.001 |
| San Marino                       | 1990 - 1999 | -0.7 (-0.9 to -0.5)  | <0.001 |
|                                  | 1999 - 2006 | -3.5 (-3.7 to -3.2)  | <0.001 |
|                                  | 2006 - 2019 | -0.5 (-0.6 to -0.4)  | <0.001 |
|                                  | 2019 - 2021 | -8.8 (-10.8 to -6.8) | <0.001 |
| Sao Tome and Principe            | 1990 - 2001 | 4.6 (2.9 to 6.3)     | <0.001 |
|                                  | 2001 - 2021 | -0.6 (-1.1 to 0)     | 0.042  |
| Saudi Arabia                     | 1990 - 1998 | -1 (-1.2 to -0.7)    | <0.001 |
|                                  | 1998 - 2002 | 1.2 (0.4 to 2.1)     | 0.009  |
|                                  | 2002 - 2006 | -1.6 (-2.3 to -0.9)  | <0.001 |
|                                  | 2006 - 2009 | -4 (-5.4 to -2.6)    | <0.001 |
|                                  | 2009 - 2012 | -2.3 (-3.9 to -0.6)  | 0.011  |
|                                  | 2012 - 2017 | 0.2 (-0.4 to 0.8)    | 0.439  |
|                                  | 2017 - 2021 | -1.8 (-2.5 to -1)    | <0.001 |
| Senegal                          | 1990 - 2021 | -0.1 (-0.3 to 0.1)   | 0.523  |
| Serbia                           | 1990 - 1997 | -0.8 (-1.7 to 0.1)   | 0.072  |
|                                  | 1997 - 2003 | -3.2 (-4.2 to -2.2)  | <0.001 |
|                                  | 2003 - 2008 | -7.7 (-9.1 to -6.3)  | <0.001 |
|                                  | 2008 - 2016 | -4.5 (-5.2 to -3.7)  | <0.001 |

|                 |             |                        |        |
|-----------------|-------------|------------------------|--------|
|                 | 2016 - 2019 | 0.3 (-6.6 to 7.8)      | 0.922  |
|                 | 2019 - 2021 | -9.9 (-17.1 to -2.1)   | 0.017  |
| Seychelles      | 1990 - 2012 | -1 (-1.3 to -0.6)      | <0.001 |
|                 | 2012 - 2019 | 8.3 (4.8 to 12)        | <0.001 |
|                 | 2019 - 2021 | -50.3 (-59.7 to -38.7) | <0.001 |
| Sierra Leone    | 1990 - 1994 | -1.5 (-2.9 to 0)       | 0.044  |
|                 | 1994 - 2000 | 1 (-0.1 to 2.1)        | 0.064  |
|                 | 2000 - 2005 | 5.5 (3.9 to 7)         | <0.001 |
|                 | 2005 - 2009 | -1.6 (-3.7 to 0.6)     | 0.143  |
|                 | 2009 - 2017 | 1.1 (0.5 to 1.7)       | 0.002  |
|                 | 2017 - 2021 | -0.9 (-2.5 to 0.6)     | 0.213  |
| Singapore       | 1990 - 1995 | -3.9 (-6.2 to -1.6)    | 0.003  |
|                 | 1995 - 2002 | 1.7 (-0.1 to 3.5)      | 0.056  |
|                 | 2002 - 2005 | -9.1 (-17.3 to -0.1)   | 0.048  |
|                 | 2005 - 2019 | 0 (-0.6 to 0.5)        | 0.9    |
|                 | 2019 - 2021 | 8.5 (-3.9 to 22.4)     | 0.175  |
| Slovakia        | 1990 - 1995 | -1.4 (-2.8 to 0.1)     | 0.059  |
|                 | 1995 - 1998 | 2.8 (-2.3 to 8.3)      | 0.265  |
|                 | 1998 - 2001 | -3.4 (-8.3 to 1.8)     | 0.183  |
|                 | 2001 - 2008 | 1.3 (0.4 to 2.3)       | 0.011  |
|                 | 2008 - 2019 | -2.4 (-2.9 to -1.9)    | <0.001 |
|                 | 2019 - 2021 | -9.1 (-17.4 to 0)      | 0.05   |
| Slovenia        | 1990 - 1999 | 0.1 (-1.1 to 1.3)      | 0.884  |
|                 | 1999 - 2015 | -4 (-4.5 to -3.5)      | <0.001 |
|                 | 2015 - 2021 | -8.9 (-11.6 to -6.1)   | <0.001 |
| Solomon Islands | 1990 - 2010 | -0.7 (-0.9 to -0.5)    | <0.001 |
|                 | 2010 - 2013 | 4.1 (-2.1 to 10.6)     | 0.19   |
|                 | 2013 - 2021 | -0.2 (-0.9 to 0.4)     | 0.49   |
| Somalia         | 1990 - 1992 | -1.2 (-2.5 to 0.2)     | 0.089  |
|                 | 1992 - 1996 | 5.2 (4.5 to 5.9)       | <0.001 |
|                 | 1996 - 2000 | 1.6 (0.8 to 2.3)       | <0.001 |
|                 | 2000 - 2006 | -1.4 (-1.7 to -1)      | <0.001 |
|                 | 2006 - 2009 | 0.7 (-0.7 to 2.1)      | 0.32   |
|                 | 2009 - 2015 | -1.2 (-1.5 to -0.9)    | <0.001 |
|                 | 2015 - 2021 | -0.4 (-0.6 to -0.2)    | 0.003  |
| South Africa    | 1990 - 2004 | 3.1 (2.7 to 3.4)       | <0.001 |
|                 | 2004 - 2008 | -0.9 (-3.8 to 2.1)     | 0.523  |
|                 | 2008 - 2011 | -4.8 (-10 to 0.7)      | 0.083  |
|                 | 2011 - 2021 | -1.3 (-1.9 to -0.8)    | <0.001 |
| South Sudan     | 1990 - 1995 | 4.2 (2.1 to 6.4)       | <0.001 |
|                 | 1995 - 2002 | -4.6 (-6.1 to -3.1)    | <0.001 |
|                 | 2002 - 2007 | 3.6 (0.5 to 6.7)       | 0.024  |
|                 | 2007 - 2010 | -1.8 (-10.8 to 8.2)    | 0.704  |
|                 | 2010 - 2021 | 2.7 (2.1 to 3.4)       | <0.001 |

|                            |             |                       |        |
|----------------------------|-------------|-----------------------|--------|
| Spain                      | 1990 - 1997 | 0.7 (-0.7 to 2.1)     | 0.332  |
|                            | 1997 - 2010 | -4.1 (-4.7 to -3.5)   | <0.001 |
|                            | 2010 - 2013 | 3.8 (-7 to 15.9)      | 0.485  |
|                            | 2013 - 2021 | -2.4 (-3.8 to -1)     | 0.002  |
| Sri Lanka                  | 1990 - 1999 | 0.9 (-1.2 to 3.1)     | 0.388  |
|                            | 1999 - 2004 | -10.9 (-15.2 to -6.2) | <0.001 |
|                            | 2004 - 2015 | -5.4 (-6.6 to -4.2)   | <0.001 |
|                            | 2015 - 2021 | 2.2 (-5.4 to 10.4)    | 0.564  |
| Sudan                      | 1990 - 1994 | 0.2 (-0.2 to 0.6)     | 0.325  |
|                            | 1994 - 2001 | -0.8 (-1 to -0.6)     | <0.001 |
|                            | 2001 - 2006 | -2.3 (-2.7 to -1.8)   | <0.001 |
|                            | 2006 - 2012 | -0.6 (-0.9 to -0.3)   | 0.001  |
|                            | 2012 - 2016 | -2.1 (-2.8 to -1.3)   | <0.001 |
|                            | 2016 - 2019 | -0.8 (-2.4 to 0.7)    | 0.267  |
|                            | 2019 - 2021 | -2.5 (-4 to -1)       | 0.004  |
| Suriname                   | 1990 - 1993 | 5.6 (-1.3 to 12.9)    | 0.103  |
|                            | 1993 - 2001 | -6.6 (-7.9 to -5.2)   | <0.001 |
|                            | 2001 - 2007 | 6.8 (4.8 to 8.8)      | <0.001 |
|                            | 2007 - 2011 | -0.3 (-3.9 to 3.5)    | 0.877  |
|                            | 2011 - 2014 | -7.6 (-14.5 to -0.2)  | 0.046  |
|                            | 2014 - 2017 | 5.8 (-2.3 to 14.5)    | 0.149  |
|                            | 2017 - 2021 | -1.2 (-4.1 to 1.8)    | 0.388  |
| Sweden                     | 1990 - 1992 | -7.4 (-14.8 to 0.6)   | 0.065  |
|                            | 1992 - 2001 | -2.7 (-3.6 to -1.8)   | <0.001 |
|                            | 2001 - 2011 | 2.6 (1.8 to 3.4)      | <0.001 |
|                            | 2011 - 2016 | -2.4 (-5.1 to 0.4)    | 0.088  |
|                            | 2016 - 2019 | 2.4 (-6.1 to 11.7)    | 0.563  |
|                            | 2019 - 2021 | -11.3 (-22.8 to 1.9)  | 0.084  |
| Switzerland                | 1990 - 1992 | 1 (-7.2 to 9.9)       | 0.813  |
|                            | 1992 - 2004 | -5.4 (-5.8 to -4.9)   | <0.001 |
|                            | 2004 - 2007 | 0.4 (-7 to 8.2)       | 0.922  |
|                            | 2007 - 2010 | -7.1 (-13.9 to 0.4)   | 0.061  |
|                            | 2010 - 2021 | -1.9 (-2.6 to -1.3)   | <0.001 |
|                            |             |                       |        |
| Syrian Arab Republic       | 1990 - 2000 | -1.2 (-1.6 to -0.9)   | <0.001 |
|                            | 2000 - 2003 | -7.8 (-11.2 to -4.2)  | <0.001 |
|                            | 2003 - 2008 | -4.1 (-5.2 to -3.1)   | <0.001 |
|                            | 2008 - 2011 | 0.5 (-3.6 to 4.8)     | 0.8    |
|                            | 2011 - 2016 | -4.4 (-5.9 to -2.9)   | <0.001 |
|                            | 2016 - 2021 | 2.9 (1.6 to 4.2)      | <0.001 |
| Taiwan (Province of China) | 1990 - 1998 | -0.1 (-0.9 to 0.7)    | 0.776  |
|                            | 1998 - 2005 | 5.3 (4 to 6.6)        | <0.001 |
|                            | 2005 - 2010 | -6.4 (-8.4 to -4.4)   | <0.001 |
|                            | 2010 - 2014 | 0.4 (-3 to 4)         | 0.814  |

|                     |             |                       |        |
|---------------------|-------------|-----------------------|--------|
|                     | 2014 - 2021 | 3.4 (2.1 to 4.7)      | <0.001 |
| Tajikistan          | 1990 - 1995 | 7.5 (6.3 to 8.7)      | <0.001 |
|                     | 1995 - 2000 | -7.3 (-8.9 to -5.5)   | <0.001 |
|                     | 2000 - 2007 | -3.9 (-5 to -2.8)     | <0.001 |
|                     | 2007 - 2015 | 1.3 (0.1 to 2.5)      | 0.032  |
|                     | 2015 - 2021 | -3.3 (-5 to -1.6)     | 0.001  |
| Thailand            | 1990 - 1996 | 7.3 (6.5 to 8.1)      | <0.001 |
|                     | 1996 - 1999 | -11.3 (-15.8 to -6.6) | <0.001 |
|                     | 1999 - 2008 | -4.5 (-5 to -4)       | <0.001 |
|                     | 2008 - 2013 | -1.9 (-3.2 to -0.5)   | 0.01   |
|                     | 2013 - 2021 | 0.6 (0.1 to 1.2)      | 0.024  |
| Timor-Leste         | 1990 - 2000 | -3 (-4.5 to -1.5)     | 0.001  |
|                     | 2000 - 2008 | -8.3 (-10.9 to -5.8)  | <0.001 |
|                     | 2008 - 2012 | 17.5 (6.1 to 30.1)    | 0.004  |
|                     | 2012 - 2021 | 0.5 (-1.2 to 2.3)     | 0.529  |
| Togo                | 1990 - 1998 | 2.6 (2.5 to 2.8)      | <0.001 |
|                     | 1998 - 2003 | 0.8 (0.3 to 1.4)      | 0.004  |
|                     | 2003 - 2006 | -0.7 (-2.4 to 1)      | 0.379  |
|                     | 2006 - 2009 | 2.8 (1.1 to 4.4)      | 0.002  |
|                     | 2009 - 2017 | -0.5 (-0.7 to -0.3)   | <0.001 |
|                     | 2017 - 2021 | -1.7 (-2.3 to -1.1)   | <0.001 |
| Tokelau             | 1990 - 2018 | -1.2 (-1.7 to -0.8)   | <0.001 |
|                     | 2018 - 2021 | 30.9 (17.6 to 45.8)   | <0.001 |
| Tonga               | 1990 - 1992 | -4 (-6.4 to -1.6)     | 0.002  |
|                     | 1992 - 1996 | -0.6 (-1.8 to 0.5)    | 0.27   |
|                     | 1996 - 1999 | 6.9 (4.7 to 9.1)      | <0.001 |
|                     | 1999 - 2021 | 0 (0 to 0.1)          | 0.195  |
| Trinidad and Tobago | 1990 - 1994 | -8.4 (-10.8 to -6)    | <0.001 |
|                     | 1994 - 2006 | -0.4 (-1 to 0.3)      | 0.239  |
|                     | 2006 - 2009 | 4.3 (-6.8 to 16.7)    | 0.442  |
|                     | 2009 - 2012 | -7.5 (-17.5 to 3.7)   | 0.17   |
|                     | 2012 - 2021 | 0.8 (-1.1 to 2.7)     | 0.408  |
| Tunisia             | 1990 - 1992 | 5.2 (3.8 to 6.6)      | <0.001 |
|                     | 1992 - 1995 | -1.4 (-2.6 to -0.2)   | 0.023  |
|                     | 1995 - 2003 | -0.2 (-0.4 to 0)      | 0.02   |
|                     | 2003 - 2014 | -1.6 (-1.7 to -1.4)   | <0.001 |
|                     | 2014 - 2021 | -2.3 (-2.5 to -2.1)   | <0.001 |
| Türkiye             | 1990 - 1999 | -1.5 (-1.9 to -1.1)   | <0.001 |
|                     | 1999 - 2002 | -5.3 (-9.6 to -0.9)   | 0.022  |
|                     | 2002 - 2005 | 4.9 (1.3 to 8.6)      | 0.011  |
|                     | 2005 - 2009 | 0.9 (-0.5 to 2.3)     | 0.176  |
|                     | 2009 - 2012 | -1.9 (-4.1 to 0.3)    | 0.089  |
|                     | 2012 - 2017 | 2.8 (2.1 to 3.5)      | <0.001 |
|                     | 2017 - 2021 | -0.7 (-1.7 to 0.3)    | 0.171  |

|                                |             |                       |        |
|--------------------------------|-------------|-----------------------|--------|
| Turkmenistan                   | 1990 - 1995 | 2.4 (0.7 to 4)        | 0.007  |
|                                | 1995 - 1998 | 13.8 (6.3 to 21.9)    | 0.001  |
|                                | 1998 - 2003 | -1.7 (-3.9 to 0.6)    | 0.127  |
|                                | 2003 - 2006 | 5.3 (-2.6 to 13.8)    | 0.182  |
|                                | 2006 - 2010 | -7.3 (-10.3 to -4.3)  | <0.001 |
|                                | 2010 - 2021 | -0.7 (-1.4 to 0.1)    | 0.066  |
| Tuvalu                         | 1990 - 1994 | -2.8 (-3.1 to -2.6)   | <0.001 |
|                                | 1994 - 1998 | -1.2 (-1.6 to -0.9)   | <0.001 |
|                                | 1998 - 2002 | -2.4 (-2.8 to -2)     | <0.001 |
|                                | 2002 - 2006 | -1.1 (-1.4 to -0.7)   | <0.001 |
|                                | 2006 - 2012 | 0.1 (-0.1 to 0.2)     | 0.468  |
|                                | 2012 - 2016 | -0.5 (-0.9 to -0.1)   | 0.022  |
| Uganda                         | 2016 - 2021 | -1.1 (-1.2 to -0.9)   | <0.001 |
|                                | 1990 - 1995 | 7.5 (6.3 to 8.7)      | <0.001 |
|                                | 1995 - 2001 | 1.8 (0.6 to 3)        | 0.004  |
|                                | 2001 - 2011 | -2.9 (-3.4 to -2.5)   | <0.001 |
|                                | 2011 - 2021 | -0.1 (-0.4 to 0.3)    | 0.663  |
| Ukraine                        | 1990 - 1995 | 9.9 (8.3 to 11.6)     | <0.001 |
|                                | 1995 - 2000 | 1.9 (-0.2 to 4)       | 0.077  |
|                                | 2000 - 2003 | -4 (-10.2 to 2.7)     | 0.221  |
|                                | 2003 - 2013 | 1.1 (0.5 to 1.7)      | 0.001  |
|                                | 2013 - 2021 | -4.1 (-5.7 to -2.6)   | <0.001 |
| United Arab Emirates           | 1990 - 2002 | 0 (-1 to 1.1)         | 0.996  |
|                                | 2002 - 2005 | 11.9 (-4.7 to 31.5)   | 0.159  |
|                                | 2005 - 2008 | -17.5 (-30.8 to -1.6) | 0.034  |
|                                | 2008 - 2016 | 4.4 (1.7 to 7.1)      | 0.002  |
|                                | 2016 - 2021 | -8.2 (-11.8 to -4.4)  | <0.001 |
| United Kingdom                 | 1990 - 1999 | -1.2 (-2.1 to -0.4)   | 0.006  |
|                                | 1999 - 2004 | -6 (-9 to -2.9)       | 0.001  |
|                                | 2004 - 2016 | -0.7 (-1.3 to 0)      | 0.041  |
|                                | 2016 - 2021 | 2.4 (-0.7 to 5.7)     | 0.124  |
| United Republic of<br>Tanzania | 1990 - 1998 | 0.4 (0.2 to 0.5)      | <0.001 |
|                                | 1998 - 2001 | -2 (-3.2 to -0.8)     | 0.003  |
|                                | 2001 - 2004 | -5.1 (-6.2 to -3.9)   | <0.001 |
|                                | 2004 - 2009 | -0.2 (-0.5 to 0.2)    | 0.318  |
|                                | 2009 - 2014 | -1.5 (-1.9 to -1.1)   | <0.001 |
|                                | 2014 - 2021 | -0.1 (-0.3 to 0.1)    | 0.288  |
| United States of<br>America    | 1990 - 1994 | 0.7 (-0.1 to 1.6)     | 0.07   |
|                                | 1994 - 1999 | -4.8 (-5.6 to -3.9)   | <0.001 |
|                                | 1999 - 2007 | -0.4 (-0.8 to 0)      | 0.037  |
|                                | 2007 - 2014 | 2.7 (2.2 to 3.1)      | <0.001 |
|                                | 2014 - 2017 | 5.9 (3.3 to 8.5)      | <0.001 |

|                                    |             |                       |                  |
|------------------------------------|-------------|-----------------------|------------------|
|                                    | 2017 - 2021 | -1.2 (-2.4 to 0)      | 0.053            |
| United States Virgin Islands       | 1990 - 1996 | 3.4 (1.2 to 5.7)      | 0.004            |
|                                    | 1996 - 2005 | -1.1 (-2.5 to 0.3)    | 0.111            |
|                                    | 2005 - 2018 | 5.6 (4.5 to 6.7)      | <0.001           |
|                                    | 2018 - 2021 | -14.8 (-23.4 to -5.3) | 0.005            |
| Uruguay                            | 1990 - 1999 | 3.3 (2.4 to 4.3)      | <0.001           |
|                                    | 1999 - 2006 | -0.9 (-2.5 to 0.6)    | 0.224            |
|                                    | 2006 - 2021 | 3 (2.6 to 3.5)        | <0.001           |
| Uzbekistan                         | 1990 - 1995 | 0 (-0.9 to 0.9)       | 0.926            |
|                                    | 1995 - 2000 | 4.9 (3.4 to 6.3)      | <0.001           |
|                                    | 2000 - 2004 | -2.9 (-5.1 to -0.6)   | 0.02             |
|                                    | 2004 - 2007 | 6.2 (0.9 to 11.8)     | 0.024            |
|                                    | 2007 - 2010 | -1.8 (-6 to 2.6)      | 0.392            |
|                                    | 2010 - 2015 | 8.1 (6.8 to 9.4)      | <0.001           |
|                                    | 2015 - 2021 | -2.7 (-3.4 to -1.9)   | <0.001           |
|                                    | Vanuatu     | 1990 - 1992           | 5.8 (2.8 to 8.9) |
| 1992 - 2000                        |             | 0 (-0.4 to 0.3)       | 0.807            |
| 2000 - 2003                        |             | -4.1 (-6.3 to -1.9)   | 0.001            |
| 2003 - 2007                        |             | 1.7 (0.5 to 2.9)      | 0.007            |
| 2007 - 2021                        |             | -0.3 (-0.4 to -0.2)   | <0.001           |
| Venezuela (Bolivarian Republic of) | 1990 - 1998 | 6.3 (5.3 to 7.4)      | <0.001           |
|                                    | 1998 - 2001 | -3.6 (-12.3 to 5.9)   | 0.428            |
|                                    | 2001 - 2021 | 1.3 (0.9 to 1.7)      | <0.001           |
| Viet Nam                           | 1990 - 1997 | -2.6 (-2.7 to -2.5)   | <0.001           |
|                                    | 1997 - 2001 | -2 (-2.3 to -1.7)     | <0.001           |
|                                    | 2001 - 2005 | 1.2 (0.9 to 1.5)      | <0.001           |
|                                    | 2005 - 2008 | 0.5 (-0.2 to 1.2)     | 0.138            |
|                                    | 2008 - 2013 | 1.4 (1.2 to 1.6)      | <0.001           |
|                                    | 2013 - 2016 | -1 (-1.7 to -0.3)     | 0.01             |
|                                    | 2016 - 2021 | -2.2 (-2.4 to -2.1)   | <0.001           |
| Yemen                              | 1990 - 2008 | 2.5 (2.1 to 2.9)      | <0.001           |
|                                    | 2008 - 2011 | -10.4 (-19.6 to -0.1) | 0.047            |
|                                    | 2011 - 2021 | -1.9 (-2.9 to -0.9)   | 0.001            |
| Zambia                             | 1990 - 1995 | 4.7 (4.3 to 5.1)      | <0.001           |
|                                    | 1995 - 1998 | 1.1 (-0.7 to 3)       | 0.198            |
|                                    | 1998 - 2008 | -1.5 (-1.7 to -1.3)   | <0.001           |
|                                    | 2008 - 2011 | -0.3 (-1.9 to 1.4)    | 0.725            |
|                                    | 2011 - 2014 | -2.6 (-4.4 to -0.8)   | 0.008            |
|                                    | 2014 - 2017 | -0.6 (-2.7 to 1.5)    | 0.544            |
|                                    | 2017 - 2021 | -1.8 (-2.6 to -1)     | <0.001           |
| Zimbabwe                           | 1990 - 1997 | 0.9 (-0.6 to 2.4)     | 0.243            |
|                                    | 1997 - 2002 | 12.6 (9.3 to 16)      | <0.001           |



2002 - 2021

0.7 (0.5 to 1)

<0.001

---

**Table S5. The trends in rate of suicide YLLs in 204 countries by Joinpoint regression**

| location            | Year        | Estimate (95%UI)     | P value |
|---------------------|-------------|----------------------|---------|
| Afghanistan         | 1990 - 1995 | 3.9 (2.9 to 4.9)     | <0.001  |
|                     | 1995 - 1999 | -1.6 (-3.5 to 0.3)   | 0.091   |
|                     | 1999 - 2002 | -7.4 (-11 to -3.6)   | 0.001   |
|                     | 2002 - 2005 | 1.4 (-2.2 to 5.3)    | 0.423   |
|                     | 2005 - 2009 | -3.1 (-5 to -1.2)    | 0.004   |
|                     | 2009 - 2021 | 0 (-0.3 to 0.2)      | 0.914   |
| Albania             | 1990 - 1998 | 3 (1.4 to 4.6)       | 0.001   |
|                     | 1998 - 2018 | -2.9 (-3.4 to -2.3)  | <0.001  |
|                     | 2018 - 2021 | -16.1 (-25.9 to -5)  | 0.007   |
| Algeria             | 1990 - 1992 | -3.2 (-5.2 to -1.1)  | 0.004   |
|                     | 1992 - 2001 | -0.1 (-0.3 to 0.1)   | 0.337   |
|                     | 2001 - 2006 | -3.3 (-4 to -2.7)    | <0.001  |
|                     | 2006 - 2015 | -1.9 (-2.1 to -1.7)  | <0.001  |
|                     | 2015 - 2021 | -2.9 (-3.2 to -2.6)  | <0.001  |
| American Samoa      | 1990 - 2007 | -0.9 (-1.1 to -0.7)  | <0.001  |
|                     | 2007 - 2015 | 1.8 (1.3 to 2.4)     | <0.001  |
|                     | 2015 - 2021 | 0.6 (-0.1 to 1.4)    | 0.091   |
| Andorra             | 1990 - 1992 | 0.8 (-2.1 to 3.9)    | 0.561   |
|                     | 1992 - 2000 | -1.9 (-2.3 to -1.5)  | <0.001  |
|                     | 2000 - 2003 | 4 (1.1 to 7)         | 0.009   |
|                     | 2003 - 2006 | 0.5 (-2.4 to 3.5)    | 0.718   |
|                     | 2006 - 2011 | -7.9 (-8.6 to -7.1)  | <0.001  |
|                     | 2011 - 2021 | -1.2 (-1.4 to -1)    | <0.001  |
| Angola              | 1990 - 1994 | 0.9 (-1.2 to 3.1)    | 0.39    |
|                     | 1994 - 1997 | -7.5 (-13.6 to -1)   | 0.027   |
|                     | 1997 - 2000 | 3.5 (-3.2 to 10.7)   | 0.301   |
|                     | 2000 - 2021 | -0.9 (-1.1 to -0.7)  | <0.001  |
| Antigua and Barbuda | 1990 - 1998 | 5.3 (1.9 to 8.9)     | 0.004   |
|                     | 1998 - 2007 | -4.9 (-8.1 to -1.7)  | 0.005   |
|                     | 2007 - 2021 | -0.2 (-1.8 to 1.4)   | 0.794   |
| Argentina           | 1990 - 2002 | 7.2 (6.8 to 7.6)     | <0.001  |
|                     | 2002 - 2005 | -3.5 (-9.2 to 2.6)   | 0.242   |
|                     | 2005 - 2012 | 1.9 (0.9 to 3)       | 0.001   |
|                     | 2012 - 2019 | -0.1 (-1.3 to 1.1)   | 0.848   |
|                     | 2019 - 2021 | -8.2 (-15.3 to -0.4) | 0.04    |
| Armenia             | 1990 - 1994 | 11.8 (6.8 to 17)     | <0.001  |
|                     | 1994 - 2003 | -9.9 (-11.7 to -8)   | <0.001  |
|                     | 2003 - 2006 | 32.7 (14.1 to 54.4)  | 0.001   |
|                     | 2006 - 2010 | 3.7 (-2.9 to 10.8)   | 0.262   |
|                     | 2010 - 2021 | -5 (-6 to -3.9)      | <0.001  |
| Australia           | 1990 - 1994 | -1.8 (-3.3 to -0.2)  | 0.028   |
|                     | 1994 - 1997 | 4.5 (-0.3 to 9.6)    | 0.065   |

|            |             |                      |        |
|------------|-------------|----------------------|--------|
|            | 1997 - 2003 | -7.6 (-8.7 to -6.4)  | <0.001 |
|            | 2003 - 2009 | -0.9 (-2 to 0.3)     | 0.136  |
|            | 2009 - 2019 | 3 (2.5 to 3.4)       | <0.001 |
|            | 2019 - 2021 | -2.9 (-9.2 to 3.8)   | 0.359  |
| Austria    | 1990 - 2006 | -2.8 (-3.2 to -2.4)  | <0.001 |
|            | 2006 - 2021 | -1.7 (-2.3 to -1.2)  | <0.001 |
| Azerbaijan | 1990 - 1993 | 25.5 (19.7 to 31.5)  | <0.001 |
|            | 1993 - 1997 | -18.6 (-23.9 to -13) | <0.001 |
|            | 1997 - 2006 | 2.7 (1.8 to 3.7)     | <0.001 |
|            | 2006 - 2017 | -0.4 (-1.2 to 0.3)   | 0.253  |
|            | 2017 - 2021 | -8.2 (-11.7 to -4.5) | <0.001 |
| Bahamas    | 1990 - 1999 | -0.4 (-1 to 0.3)     | 0.238  |
|            | 1999 - 2006 | -2.8 (-4 to -1.6)    | <0.001 |
|            | 2006 - 2010 | 6.8 (3 to 10.7)      | 0.001  |
|            | 2010 - 2021 | -1.2 (-2 to -0.5)    | 0.003  |
| Bahrain    | 1990 - 1994 | -4 (-6.3 to -1.6)    | 0.003  |
|            | 1994 - 2001 | 5.2 (3.9 to 6.6)     | <0.001 |
|            | 2001 - 2013 | -4.3 (-4.8 to -3.7)  | <0.001 |
|            | 2013 - 2016 | -7.3 (-15.4 to 1.5)  | 0.097  |
|            | 2016 - 2021 | -0.2 (-2.4 to 2.1)   | 0.86   |
| Bangladesh | 1990 - 1996 | -1.7 (-2.5 to -1)    | <0.001 |
|            | 1996 - 2004 | -3.3 (-3.8 to -2.7)  | <0.001 |
|            | 2004 - 2007 | -0.5 (-3.8 to 2.9)   | 0.768  |
|            | 2007 - 2010 | -3.5 (-6.6 to -0.3)  | 0.033  |
|            | 2010 - 2013 | -8.7 (-12.2 to -5.2) | <0.001 |
|            | 2013 - 2021 | -2.3 (-2.8 to -1.7)  | <0.001 |
| Barbados   | 1990 - 1997 | 0.5 (-0.9 to 2)      | 0.446  |
|            | 1997 - 2007 | -4.7 (-5.7 to -3.7)  | <0.001 |
|            | 2007 - 2021 | 0.6 (-0.2 to 1.4)    | 0.152  |
| Belarus    | 1990 - 1993 | 10.7 (7 to 14.5)     | <0.001 |
|            | 1993 - 2001 | 4.4 (3.6 to 5.3)     | <0.001 |
|            | 2001 - 2011 | -0.8 (-1.4 to -0.3)  | 0.006  |
|            | 2011 - 2017 | -10.5 (-12 to -8.9)  | <0.001 |
|            | 2017 - 2021 | -2.5 (-6.1 to 1.3)   | 0.186  |
| Belgium    | 1990 - 1995 | 4.9 (2.7 to 7.1)     | <0.001 |
|            | 1995 - 2006 | -3.8 (-4.5 to -3.1)  | <0.001 |
|            | 2006 - 2011 | 1.1 (-1.9 to 4.2)    | 0.45   |
|            | 2011 - 2021 | -3.2 (-4 to -2.3)    | <0.001 |
| Belize     | 1990 - 1998 | 7.5 (6 to 9.1)       | <0.001 |
|            | 1998 - 2021 | -2.1 (-2.4 to -1.8)  | <0.001 |
| Benin      | 1990 - 1999 | 1.1 (0.9 to 1.2)     | <0.001 |
|            | 1999 - 2006 | -1.9 (-2.2 to -1.5)  | <0.001 |
|            | 2006 - 2013 | 1.7 (1.3 to 2.1)     | <0.001 |
|            | 2013 - 2021 | -1.5 (-1.8 to -1.2)  | <0.001 |

|                                  |             |                      |        |
|----------------------------------|-------------|----------------------|--------|
| Bermuda                          | 1990 - 2006 | -4.7 (-5.1 to -4.4)  | <0.001 |
|                                  | 2006 - 2011 | 0.6 (-2.3 to 3.7)    | 0.665  |
|                                  | 2011 - 2021 | -2.8 (-3.7 to -1.8)  | <0.001 |
| Bhutan                           | 1990 - 1997 | 0 (-0.5 to 0.5)      | 0.951  |
|                                  | 1997 - 2014 | -1.1 (-1.3 to -0.9)  | <0.001 |
|                                  | 2014 - 2021 | -2.3 (-3.1 to -1.6)  | <0.001 |
| Bolivia (Plurinational State of) | 1990 - 1994 | 0.2 (-0.1 to 0.6)    | 0.173  |
|                                  | 1994 - 2000 | 0.7 (0.5 to 1)       | <0.001 |
|                                  | 2000 - 2010 | -0.5 (-0.6 to -0.4)  | <0.001 |
|                                  | 2010 - 2018 | -1.6 (-1.8 to -1.4)  | <0.001 |
|                                  | 2018 - 2021 | -2.3 (-3 to -1.5)    | <0.001 |
| Bosnia and Herzegovina           | 1990 - 1992 | 14.7 (3.6 to 27.1)   | 0.011  |
|                                  | 1992 - 1997 | -8.7 (-12.8 to -4.4) | 0.001  |
|                                  | 1997 - 2013 | -2.2 (-2.7 to -1.6)  | <0.001 |
|                                  | 2013 - 2018 | 1.4 (-2 to 5)        | 0.4    |
|                                  | 2018 - 2021 | -12.6 (-17.9 to -7)  | <0.001 |
| Botswana                         | 1990 - 1994 | 2.9 (2.3 to 3.5)     | <0.001 |
|                                  | 1994 - 2002 | 0.1 (-0.2 to 0.4)    | 0.356  |
|                                  | 2002 - 2006 | -5.1 (-6 to -4.2)    | <0.001 |
|                                  | 2006 - 2011 | 2 (1.5 to 2.5)       | <0.001 |
|                                  | 2011 - 2014 | -2.7 (-4.1 to -1.2)  | 0.002  |
|                                  | 2014 - 2017 | -5.8 (-7.2 to -4.5)  | <0.001 |
|                                  | 2017 - 2021 | -2.4 (-2.9 to -1.9)  | <0.001 |
| Brazil                           | 1990 - 1994 | 2.5 (0.8 to 4.2)     | 0.006  |
|                                  | 1994 - 1997 | -1.7 (-6.6 to 3.5)   | 0.495  |
|                                  | 1997 - 2013 | 0.4 (0.2 to 0.7)     | <0.001 |
|                                  | 2013 - 2019 | 6.6 (5.5 to 7.8)     | <0.001 |
|                                  | 2019 - 2021 | -2.5 (-7.2 to 2.5)   | 0.306  |
| Brunei Darussalam                | 1990 - 2001 | -4.4 (-5.9 to -3)    | <0.001 |
|                                  | 2001 - 2013 | -0.4 (-1.5 to 0.8)   | 0.483  |
|                                  | 2013 - 2021 | -3.8 (-5.7 to -1.8)  | 0.001  |
| Bulgaria                         | 1990 - 1997 | 2.8 (1.5 to 4.1)     | <0.001 |
|                                  | 1997 - 2003 | -6.2 (-8.1 to -4.2)  | <0.001 |
|                                  | 2003 - 2012 | -1.1 (-2.2 to 0.1)   | 0.062  |
|                                  | 2012 - 2021 | -5 (-6.1 to -3.9)    | <0.001 |
| Burkina Faso                     | 1990 - 1992 | -1.9 (-5 to 1.2)     | 0.212  |
|                                  | 1992 - 2000 | 0.1 (-0.4 to 0.5)    | 0.78   |
|                                  | 2000 - 2010 | -1 (-1.3 to -0.7)    | <0.001 |
|                                  | 2010 - 2016 | 2.6 (1.9 to 3.4)     | <0.001 |
|                                  | 2016 - 2021 | -2.3 (-3.1 to -1.5)  | <0.001 |
| Burundi                          | 1990 - 1996 | -0.8 (-1.4 to -0.1)  | 0.019  |
|                                  | 1996 - 2008 | -3 (-3.3 to -2.8)    | <0.001 |
|                                  | 2008 - 2011 | 0.4 (-4 to 4.9)      | 0.858  |

|                          |             |                       |        |
|--------------------------|-------------|-----------------------|--------|
|                          | 2011 - 2021 | -1.8 (-2.2 to -1.5)   | <0.001 |
| Cabo Verde               | 1990 - 2004 | 1 (0.7 to 1.3)        | <0.001 |
|                          | 2004 - 2007 | -3.2 (-9.1 to 3.2)    | 0.306  |
|                          | 2007 - 2016 | -0.3 (-1 to 0.4)      | 0.363  |
|                          | 2016 - 2021 | 2.5 (0.9 to 4.1)      | 0.004  |
| Cambodia                 | 1990 - 1998 | -0.8 (-1.1 to -0.5)   | <0.001 |
|                          | 1998 - 2006 | -1.9 (-2.3 to -1.6)   | <0.001 |
|                          | 2006 - 2021 | -1.1 (-1.2 to -0.9)   | <0.001 |
| Cameroon                 | 1990 - 1992 | 4.1 (2.8 to 5.3)      | <0.001 |
|                          | 1992 - 2000 | 2.5 (2.3 to 2.7)      | <0.001 |
|                          | 2000 - 2003 | 0.3 (-1 to 1.6)       | 0.63   |
|                          | 2003 - 2006 | -0.5 (-1.9 to 0.9)    | 0.435  |
|                          | 2006 - 2010 | 1.4 (0.7 to 2.1)      | 0.001  |
|                          | 2010 - 2014 | -0.6 (-1.4 to 0.1)    | 0.087  |
|                          | 2014 - 2021 | -2.3 (-2.5 to -2.1)   | <0.001 |
| Canada                   | 1990 - 1995 | -0.1 (-1 to 0.8)      | 0.806  |
|                          | 1995 - 2007 | -2.7 (-3 to -2.5)     | <0.001 |
|                          | 2007 - 2013 | 1 (0.1 to 1.9)        | 0.035  |
|                          | 2013 - 2018 | 3.4 (2.1 to 4.7)      | <0.001 |
|                          | 2018 - 2021 | -1.2 (-3.8 to 1.5)    | 0.353  |
| Central African Republic | 1990 - 2021 | -0.4 (-0.5 to -0.3)   | <0.001 |
| Chad                     | 1990 - 1995 | 1.4 (0.2 to 2.6)      | 0.023  |
|                          | 1995 - 2001 | 4.8 (3.6 to 6)        | <0.001 |
|                          | 2001 - 2021 | 0.2 (0.1 to 0.3)      | 0.008  |
| Chile                    | 1990 - 2003 | -4.5 (-4.9 to -4.1)   | <0.001 |
|                          | 2003 - 2009 | 4.7 (3.4 to 6)        | <0.001 |
|                          | 2009 - 2013 | -7.3 (-10.1 to -4.5)  | <0.001 |
|                          | 2013 - 2021 | -0.8 (-1.6 to 0)      | 0.049  |
| China                    | 1990 - 1993 | -1.5 (-3.2 to 0.2)    | 0.074  |
|                          | 1993 - 2001 | -6.4 (-6.8 to -6.1)   | <0.001 |
|                          | 2001 - 2004 | -5.3 (-6.9 to -3.6)   | <0.001 |
|                          | 2004 - 2007 | -7.7 (-8.9 to -6.5)   | <0.001 |
|                          | 2007 - 2010 | -2.6 (-4.2 to -0.9)   | 0.006  |
|                          | 2010 - 2013 | -7.2 (-9.3 to -5)     | <0.001 |
|                          | 2013 - 2021 | -1.8 (-2 to -1.5)     | <0.001 |
| Colombia                 | 1990 - 1993 | 1.7 (-1.8 to 5.4)     | 0.315  |
|                          | 1993 - 1996 | 13.5 (5.9 to 21.6)    | 0.001  |
|                          | 1996 - 2008 | 0 (-0.4 to 0.5)       | 0.968  |
|                          | 2008 - 2014 | -2.4 (-3.8 to -1.1)   | 0.002  |
|                          | 2014 - 2018 | 8.9 (5.3 to 12.5)     | <0.001 |
|                          | 2018 - 2021 | -3.7 (-8.9 to 1.7)    | 0.159  |
| Comoros                  | 1990 - 2008 | -3 (-4 to -2)         | <0.001 |
|                          | 2008 - 2011 | -21.1 (-46.9 to 17.4) | 0.229  |
|                          | 2011 - 2014 | 36.2 (-10.1 to 106.4) | 0.137  |

|               |             |                       |        |
|---------------|-------------|-----------------------|--------|
|               | 2014 - 2021 | -0.9 (-4.3 to 2.7)    | 0.61   |
| Congo         | 1990 - 1997 | 3.1 (1.8 to 4.4)      | <0.001 |
|               | 1997 - 2002 | -4.3 (-7 to -1.4)     | 0.005  |
|               | 2002 - 2006 | 1 (-3 to 5.2)         | 0.61   |
|               | 2006 - 2021 | -1.1 (-1.5 to -0.7)   | <0.001 |
| Cook Islands  | 1990 - 1997 | -2.9 (-3.1 to -2.7)   | <0.001 |
|               | 1997 - 2000 | -1.7 (-2.8 to -0.5)   | 0.009  |
|               | 2000 - 2006 | -3.3 (-3.6 to -3.1)   | <0.001 |
|               | 2006 - 2009 | -1.3 (-2.3 to -0.2)   | 0.02   |
|               | 2009 - 2012 | 1.3 (0.1 to 2.5)      | 0.03   |
|               | 2012 - 2015 | 0.3 (-0.9 to 1.5)     | 0.599  |
|               | 2015 - 2021 | -1.2 (-1.5 to -1)     | <0.001 |
| Costa Rica    | 1990 - 1993 | -0.4 (-8.8 to 8.7)    | 0.922  |
|               | 1993 - 1996 | 12.6 (-4.4 to 32.6)   | 0.146  |
|               | 1996 - 2004 | 1.5 (-0.6 to 3.6)     | 0.157  |
|               | 2004 - 2008 | -4.3 (-11.4 to 3.4)   | 0.248  |
|               | 2008 - 2021 | 2.5 (1.6 to 3.3)      | <0.001 |
| Côte d'Ivoire | 1990 - 1995 | 2.8 (2.1 to 3.4)      | <0.001 |
|               | 1995 - 1999 | 1.2 (-0.2 to 2.6)     | 0.08   |
|               | 1999 - 2006 | -0.6 (-1.1 to -0.1)   | 0.015  |
|               | 2006 - 2011 | -2.1 (-3 to -1.2)     | <0.001 |
|               | 2011 - 2014 | 3.8 (0.9 to 6.7)      | 0.014  |
|               | 2014 - 2017 | -1.6 (-4.2 to 1.1)    | 0.227  |
|               | 2017 - 2021 | -3 (-4.1 to -1.9)     | <0.001 |
| Croatia       | 1990 - 1992 | 17.3 (5.7 to 30.2)    | 0.005  |
|               | 1992 - 2005 | -3.6 (-4.3 to -2.9)   | <0.001 |
|               | 2005 - 2014 | -2 (-3.2 to -0.7)     | 0.003  |
|               | 2014 - 2021 | -5.9 (-7.9 to -3.8)   | <0.001 |
| Cuba          | 1990 - 1992 | -0.5 (-9.4 to 9.4)    | 0.919  |
|               | 1992 - 1999 | -7.5 (-9.1 to -5.8)   | <0.001 |
|               | 1999 - 2002 | -13.6 (-23.2 to -2.8) | 0.018  |
|               | 2002 - 2007 | -5.7 (-9.6 to -1.7)   | 0.008  |
|               | 2007 - 2010 | 4.7 (-7.8 to 18.9)    | 0.457  |
|               | 2010 - 2021 | -0.8 (-1.8 to 0.3)    | 0.14   |
| Cyprus        | 1990 - 1997 | 3.9 (2.2 to 5.6)      | <0.001 |
|               | 1997 - 2007 | -1.5 (-2.5 to -0.6)   | 0.004  |
|               | 2007 - 2013 | -4 (-6 to -2)         | 0.001  |
|               | 2013 - 2017 | 0.9 (-3.6 to 5.7)     | 0.679  |
|               | 2017 - 2021 | -6.5 (-9.7 to -3.2)   | 0.001  |
| Czechia       | 1990 - 1994 | 3.4 (0.3 to 6.6)      | 0.035  |
|               | 1994 - 2005 | -1.8 (-2.5 to -1.1)   | <0.001 |
|               | 2005 - 2012 | 0.7 (-0.8 to 2.3)     | 0.342  |
|               | 2012 - 2015 | -7.5 (-16.1 to 2)     | 0.109  |
|               | 2015 - 2018 | 0.6 (-8.8 to 11)      | 0.891  |

|                                          |                                     |                       |                     |
|------------------------------------------|-------------------------------------|-----------------------|---------------------|
|                                          | 2018 - 2021                         | -12.7 (-18.1 to -6.8) | <0.001              |
| Democratic People's<br>Republic of Korea | 1990 - 1994                         | -1 (-1.4 to -0.7)     | <0.001              |
|                                          | 1994 - 2000                         | -1.8 (-2 to -1.5)     | <0.001              |
|                                          | 2000 - 2005                         | -3.1 (-3.4 to -2.7)   | <0.001              |
|                                          | 2005 - 2010                         | 1 (0.6 to 1.3)        | <0.001              |
|                                          | 2010 - 2014                         | -2.6 (-3.1 to -2.1)   | <0.001              |
|                                          | 2014 - 2021                         | -0.9 (-1 to -0.7)     | <0.001              |
|                                          | Democratic Republic of<br>the Congo | 1990 - 1994           | -2.2 (-3.6 to -0.8) |
| 1994 - 2010                              |                                     | -0.2 (-0.4 to 0)      | 0.041               |
| 2010 - 2014                              |                                     | 1.8 (-0.8 to 4.5)     | 0.175               |
| 2014 - 2021                              |                                     | -0.5 (-1.2 to 0.2)    | 0.177               |
| Denmark                                  | 1990 - 2000                         | -1.8 (-2.6 to -1)     | <0.001              |
|                                          | 2000 - 2006                         | -5.4 (-7.6 to -3.2)   | <0.001              |
|                                          | 2006 - 2016                         | -2.4 (-3.3 to -1.5)   | <0.001              |
|                                          | 2016 - 2021                         | 0.9 (-2.2 to 4)       | 0.559               |
| Djibouti                                 | 1990 - 2001                         | 2.9 (1.8 to 4)        | <0.001              |
|                                          | 2001 - 2021                         | -1 (-1.5 to -0.5)     | <0.001              |
| Dominica                                 | 1990 - 1994                         | 0.3 (-0.1 to 0.8)     | 0.154               |
|                                          | 1994 - 1999                         | -1.6 (-2.1 to -1.2)   | <0.001              |
|                                          | 1999 - 2002                         | -2.6 (-4.1 to -1)     | 0.004               |
|                                          | 2002 - 2006                         | -1.3 (-2.1 to -0.5)   | 0.002               |
|                                          | 2006 - 2012                         | 2.2 (1.9 to 2.6)      | <0.001              |
|                                          | 2012 - 2021                         | 0.8 (0.7 to 1)        | <0.001              |
|                                          | Dominican Republic                  | 1990 - 2011           | 0.2 (0 to 0.4)      |
| 2011 - 2017                              |                                     | 6.5 (4 to 9)          | <0.001              |
| 2017 - 2021                              |                                     | -9.6 (-13.1 to -6)    | <0.001              |
| Ecuador                                  | 1990 - 2002                         | 3.9 (3.1 to 4.7)      | <0.001              |
|                                          | 2002 - 2005                         | 8.7 (-10.1 to 31.4)   | 0.37                |
|                                          | 2005 - 2019                         | -0.6 (-1.4 to 0.3)    | 0.175               |
|                                          | 2019 - 2021                         | -11.5 (-33.8 to 18.4) | 0.393               |
| Egypt                                    | 1990 - 1992                         | -7.1 (-12.3 to -1.7)  | 0.013               |
|                                          | 1992 - 1996                         | 2.1 (-0.6 to 4.8)     | 0.115               |
|                                          | 1996 - 2000                         | -2.2 (-4.7 to 0.4)    | 0.088               |
|                                          | 2000 - 2015                         | 0.5 (0.3 to 0.8)      | <0.001              |
|                                          | 2015 - 2021                         | -2.7 (-3.5 to -1.8)   | <0.001              |
| El Salvador                              | 1990 - 2013                         | -2.4 (-2.7 to -2.1)   | <0.001              |
|                                          | 2013 - 2016                         | 10.1 (-7 to 30.4)     | 0.252               |
|                                          | 2016 - 2021                         | -8 (-12.4 to -3.4)    | 0.002               |
| Equatorial Guinea                        | 1990 - 1996                         | -1.6 (-2.4 to -0.8)   | <0.001              |
|                                          | 1996 - 2002                         | -4.9 (-6 to -3.8)     | <0.001              |
|                                          | 2002 - 2014                         | -0.8 (-1.3 to -0.4)   | 0.001               |
|                                          | 2014 - 2021                         | 2.6 (1.6 to 3.5)      | <0.001              |

|          |             |                       |        |
|----------|-------------|-----------------------|--------|
| Eritrea  | 1990 - 1993 | -0.6 (-1.6 to 0.4)    | 0.255  |
|          | 1993 - 1996 | 2.7 (0.3 to 5)        | 0.026  |
|          | 1996 - 2001 | -1.4 (-2.1 to -0.7)   | 0.001  |
|          | 2001 - 2004 | 1.2 (-1.4 to 3.8)     | 0.339  |
|          | 2004 - 2021 | -0.6 (-0.7 to -0.5)   | <0.001 |
| Estonia  | 1990 - 1994 | 6.1 (2.1 to 10.2)     | 0.005  |
|          | 1994 - 2008 | -2.8 (-3.4 to -2.2)   | <0.001 |
|          | 2008 - 2011 | -8.8 (-18 to 1.4)     | 0.085  |
|          | 2011 - 2014 | 0.3 (-9.9 to 11.5)    | 0.957  |
|          | 2014 - 2017 | -12.2 (-22.5 to -0.5) | 0.043  |
| Eswatini | 2017 - 2021 | -0.9 (-5.5 to 4)      | 0.702  |
|          | 1990 - 1994 | 1.6 (1 to 2.2)        | <0.001 |
|          | 1994 - 1998 | 5.8 (4.8 to 6.7)      | <0.001 |
|          | 1998 - 2003 | 9 (8.3 to 9.6)        | <0.001 |
|          | 2003 - 2009 | 0.3 (-0.1 to 0.8)     | 0.136  |
| Ethiopia | 2009 - 2021 | -1.9 (-2.1 to -1.8)   | <0.001 |
|          | 1990 - 1996 | -1.4 (-1.7 to -1.2)   | <0.001 |
|          | 1996 - 2007 | -4 (-4.1 to -3.9)     | <0.001 |
|          | 2007 - 2010 | -3 (-3.8 to -2.2)     | <0.001 |
|          | 2010 - 2015 | -1.7 (-1.9 to -1.5)   | <0.001 |
| Fiji     | 2015 - 2021 | -0.2 (-0.3 to 0)      | 0.051  |
|          | 1990 - 1998 | -1.7 (-2.3 to -1.1)   | <0.001 |
|          | 1998 - 2001 | 3 (-1.4 to 7.7)       | 0.174  |
|          | 2001 - 2009 | -1.8 (-2.3 to -1.3)   | <0.001 |
|          | 2009 - 2012 | 4.1 (0 to 8.4)        | 0.051  |
| Finland  | 2012 - 2021 | -1.4 (-2 to -0.8)     | <0.001 |
|          | 1990 - 1992 | -9.5 (-18 to -0.1)    | 0.048  |
|          | 1992 - 2006 | -1.9 (-2.4 to -1.4)   | <0.001 |
|          | 2006 - 2011 | 0.5 (-3 to 4.1)       | 0.763  |
|          | 2011 - 2014 | -8.5 (-17.1 to 1)     | 0.076  |
| France   | 2014 - 2021 | 1.4 (-0.4 to 3.2)     | 0.115  |
|          | 1990 - 1993 | 3.5 (1.8 to 5.3)      | 0.001  |
|          | 1993 - 2000 | -5.2 (-5.7 to -4.6)   | <0.001 |
|          | 2000 - 2003 | -1 (-4.3 to 2.4)      | 0.522  |
|          | 2003 - 2007 | -3.9 (-5.4 to -2.3)   | <0.001 |
| Gabon    | 2007 - 2010 | 0.9 (-2.4 to 4.4)     | 0.565  |
|          | 2010 - 2016 | -5.6 (-6.3 to -4.9)   | <0.001 |
|          | 2016 - 2021 | -1 (-2.2 to 0.3)      | 0.111  |
|          | 1990 - 1998 | 1.3 (0.5 to 2.1)      | 0.002  |
|          | 1998 - 2021 | -0.7 (-0.9 to -0.5)   | <0.001 |
| Gambia   | 1990 - 1999 | 2.1 (1 to 3.3)        | 0.001  |
|          | 1999 - 2002 | -3 (-13.6 to 9)       | 0.589  |
|          | 2002 - 2005 | 7.7 (-3.4 to 20.1)    | 0.167  |
|          | 2005 - 2012 | -4.2 (-6.1 to -2.2)   | 0.001  |



|           |             |                        |        |
|-----------|-------------|------------------------|--------|
|           | 2012 - 2017 | 5.4 (1.2 to 9.8)       | 0.015  |
|           | 2017 - 2021 | 0.4 (-3.2 to 4.2)      | 0.817  |
| Georgia   | 1990 - 1997 | 5.5 (3.7 to 7.4)       | <0.001 |
|           | 1997 - 2005 | -8.4 (-10.2 to -6.6)   | <0.001 |
|           | 2005 - 2009 | 12.8 (5.4 to 20.7)     | 0.001  |
|           | 2009 - 2021 | 0.2 (-0.6 to 1)        | 0.564  |
| Germany   | 1990 - 2001 | -1.8 (-2.1 to -1.5)    | <0.001 |
|           | 2001 - 2007 | -3.5 (-4.3 to -2.6)    | <0.001 |
|           | 2007 - 2010 | 2.1 (-2 to 6.3)        | 0.298  |
|           | 2010 - 2013 | -3.3 (-7.1 to 0.6)     | 0.093  |
|           | 2013 - 2016 | 1.3 (-2.3 to 5.1)      | 0.447  |
|           | 2016 - 2021 | -3.1 (-4.2 to -1.9)    | <0.001 |
| Ghana     | 1990 - 1995 | 0 (-0.5 to 0.5)        | 0.963  |
|           | 1995 - 2000 | 1 (0.3 to 1.6)         | 0.005  |
|           | 2000 - 2004 | 3.3 (2.3 to 4.2)       | <0.001 |
|           | 2004 - 2008 | -1.7 (-2.6 to -0.8)    | 0.001  |
|           | 2008 - 2017 | 1.6 (1.4 to 1.8)       | <0.001 |
|           | 2017 - 2021 | -3 (-3.7 to -2.2)      | <0.001 |
| Greece    | 1990 - 1992 | -7 (-16.5 to 3.7)      | 0.181  |
|           | 1992 - 1997 | 1.4 (-2.2 to 5.2)      | 0.417  |
|           | 1997 - 2008 | -2.4 (-3.2 to -1.5)    | <0.001 |
|           | 2008 - 2012 | 4.7 (-1.9 to 11.7)     | 0.158  |
|           | 2012 - 2021 | -0.6 (-1.8 to 0.7)     | 0.343  |
| Greenland | 1990 - 2000 | -4.6 (-4.8 to -4.4)    | <0.001 |
|           | 2000 - 2006 | -1.4 (-1.9 to -0.9)    | <0.001 |
|           | 2006 - 2012 | -0.1 (-0.6 to 0.5)     | 0.842  |
|           | 2012 - 2021 | -1.8 (-2 to -1.6)      | <0.001 |
| Grenada   | 1990 - 1994 | -6.2 (-8.4 to -4)      | <0.001 |
|           | 1994 - 2000 | -2.6 (-4.1 to -1)      | 0.002  |
|           | 2000 - 2008 | 2.2 (1.2 to 3.2)       | <0.001 |
|           | 2008 - 2014 | -6.1 (-7.6 to -4.6)    | <0.001 |
|           | 2014 - 2021 | 1 (-0.2 to 2.3)        | 0.089  |
| Guam      | 1990 - 1994 | 1.7 (-2 to 5.5)        | 0.343  |
|           | 1994 - 1999 | -5.3 (-8.3 to -2.3)    | 0.003  |
|           | 1999 - 2007 | -1.4 (-2.6 to -0.1)    | 0.032  |
|           | 2007 - 2012 | 7.2 (4.3 to 10.2)      | <0.001 |
|           | 2012 - 2015 | -5.3 (-13.6 to 3.8)    | 0.221  |
|           | 2015 - 2018 | 11.4 (-0.8 to 25.1)    | 0.065  |
|           | 2018 - 2021 | -16.2 (-21.3 to -10.8) | <0.001 |
| Guatemala | 1990 - 1998 | 0.9 (-0.5 to 2.3)      | 0.202  |
|           | 1998 - 2001 | 25 (9.9 to 42.2)       | 0.002  |
|           | 2001 - 2012 | -4.7 (-5.6 to -3.8)    | <0.001 |
|           | 2012 - 2019 | 2.7 (0.8 to 4.7)       | 0.008  |
|           | 2019 - 2021 | -11.5 (-26.2 to 6.3)   | 0.179  |

|                            |             |                      |        |
|----------------------------|-------------|----------------------|--------|
| Guinea                     | 1990 - 2007 | 1.7 (1.6 to 1.8)     | <0.001 |
|                            | 2007 - 2015 | 0.5 (0 to 0.9)       | 0.034  |
|                            | 2015 - 2021 | -1.4 (-2 to -0.8)    | <0.001 |
| Guinea-Bissau              | 1990 - 1997 | 0.6 (0.3 to 0.9)     | <0.001 |
|                            | 1997 - 2001 | 1.6 (0.6 to 2.6)     | 0.003  |
|                            | 2001 - 2008 | 0.6 (0.3 to 0.9)     | 0.001  |
|                            | 2008 - 2018 | -0.8 (-1 to -0.7)    | <0.001 |
|                            | 2018 - 2021 | -2 (-2.8 to -1.1)    | <0.001 |
| Guyana                     | 1990 - 1995 | -4.8 (-7.6 to -2)    | 0.002  |
|                            | 1995 - 1999 | 11.9 (4.3 to 20.2)   | 0.004  |
|                            | 1999 - 2009 | -2.3 (-3.1 to -1.6)  | <0.001 |
|                            | 2009 - 2014 | 5.9 (3.1 to 8.7)     | <0.001 |
|                            | 2014 - 2021 | -1.8 (-3.5 to 0)     | 0.054  |
| Haiti                      | 1990 - 2021 | -0.5 (-0.7 to -0.3)  | <0.001 |
| Honduras                   | 1990 - 1997 | -1.4 (-1.6 to -1.2)  | <0.001 |
|                            | 1997 - 2003 | -0.5 (-0.8 to -0.1)  | 0.02   |
|                            | 2003 - 2009 | -2.9 (-3.4 to -2.5)  | <0.001 |
|                            | 2009 - 2012 | -6.2 (-8.1 to -4.3)  | <0.001 |
|                            | 2012 - 2021 | -0.6 (-0.8 to -0.4)  | <0.001 |
| Hungary                    | 1990 - 1993 | -0.4 (-4.2 to 3.6)   | 0.843  |
|                            | 1993 - 1996 | -6.1 (-12.9 to 1.2)  | 0.094  |
|                            | 1996 - 1999 | 2.3 (-4.8 to 10)     | 0.505  |
|                            | 1999 - 2006 | -5 (-6.2 to -3.8)    | <0.001 |
|                            | 2006 - 2009 | 4.1 (-3 to 11.7)     | 0.247  |
|                            | 2009 - 2021 | -3.4 (-3.9 to -2.8)  | <0.001 |
| Iceland                    | 1990 - 1995 | -5.9 (-8.4 to -3.4)  | <0.001 |
|                            | 1995 - 2000 | 2.2 (-1.5 to 6.1)    | 0.225  |
|                            | 2000 - 2012 | -3.2 (-4 to -2.4)    | <0.001 |
|                            | 2012 - 2015 | 3.3 (-8.1 to 16.1)   | 0.564  |
|                            | 2015 - 2019 | -6.7 (-12.8 to -0.1) | 0.047  |
|                            | 2019 - 2021 | 7.5 (-8.4 to 26.2)   | 0.35   |
| India                      | 1990 - 1996 | -0.6 (-2 to 0.7)     | 0.311  |
|                            | 1996 - 1999 | 2.9 (-4.2 to 10.4)   | 0.403  |
|                            | 1999 - 2002 | -4.9 (-10.7 to 1.2)  | 0.104  |
|                            | 2002 - 2005 | 1.2 (-3.8 to 6.5)    | 0.617  |
|                            | 2005 - 2012 | -2.3 (-3.2 to -1.4)  | <0.001 |
|                            | 2012 - 2019 | -5.4 (-6.2 to -4.5)  | <0.001 |
|                            | 2019 - 2021 | 2.9 (-3 to 9.2)      | 0.307  |
| Indonesia                  | 1990 - 2003 | 0.2 (0.2 to 0.3)     | <0.001 |
|                            | 2003 - 2011 | -1.1 (-1.3 to -0.9)  | <0.001 |
|                            | 2011 - 2014 | 0.3 (-1.3 to 2)      | 0.715  |
|                            | 2014 - 2021 | -1 (-1.3 to -0.8)    | <0.001 |
| Iran (Islamic Republic of) | 1990 - 1995 | -1.3 (-2.2 to -0.4)  | 0.009  |
|                            | 1995 - 2001 | 0.5 (-0.3 to 1.3)    | 0.182  |

|            |             |                        |        |
|------------|-------------|------------------------|--------|
|            | 2001 - 2011 | -0.5 (-0.8 to -0.3)    | <0.001 |
|            | 2011 - 2019 | -3.6 (-4 to -3.3)      | <0.001 |
|            | 2019 - 2021 | -5.6 (-8.1 to -3.1)    | <0.001 |
| Iraq       | 1990 - 1996 | 1.6 (1.2 to 1.9)       | <0.001 |
|            | 1996 - 2005 | -2.1 (-2.3 to -1.9)    | <0.001 |
|            | 2005 - 2008 | -3.7 (-5.7 to -1.7)    | 0.001  |
|            | 2008 - 2017 | -0.8 (-1.1 to -0.6)    | <0.001 |
|            | 2017 - 2021 | -3.7 (-4.3 to -3.1)    | <0.001 |
| Ireland    | 1990 - 1993 | 2.6 (-0.6 to 5.8)      | 0.103  |
|            | 1993 - 1997 | 10.8 (7.8 to 13.9)     | <0.001 |
|            | 1997 - 2006 | -0.8 (-1.3 to -0.2)    | 0.01   |
|            | 2006 - 2011 | -3.6 (-5 to -2.2)      | <0.001 |
|            | 2011 - 2014 | -11.5 (-15.9 to -6.8)  | <0.001 |
|            | 2014 - 2021 | -6.1 (-7.3 to -4.9)    | <0.001 |
| Israel     | 1990 - 1997 | 4.5 (2.8 to 6.4)       | <0.001 |
|            | 1997 - 2009 | -4 (-4.8 to -3.1)      | <0.001 |
|            | 2009 - 2012 | -10 (-20.5 to 2)       | 0.095  |
|            | 2012 - 2021 | -0.9 (-2.4 to 0.6)     | 0.208  |
| Italy      | 1990 - 1997 | 3.5 (2.2 to 4.8)       | <0.001 |
|            | 1997 - 2005 | -6.4 (-7.5 to -5.3)    | <0.001 |
|            | 2005 - 2017 | 0.3 (-0.4 to 1)        | 0.465  |
|            | 2017 - 2021 | -6.3 (-10 to -2.5)     | 0.003  |
| Jamaica    | 1990 - 2000 | 2.5 (0.9 to 4.1)       | 0.004  |
|            | 2000 - 2006 | -11.3 (-13.4 to -9.2)  | <0.001 |
|            | 2006 - 2009 | 22.6 (5.3 to 42.8)     | 0.011  |
|            | 2009 - 2014 | -4.5 (-7.9 to -1)      | 0.016  |
|            | 2014 - 2021 | 2.1 (-0.7 to 5)        | 0.131  |
| Japan      | 1990 - 1996 | 2.8 (1.6 to 3.9)       | <0.001 |
|            | 1996 - 1999 | 9.6 (3.8 to 15.6)      | 0.003  |
|            | 1999 - 2002 | -2.6 (-7.6 to 2.7)     | 0.298  |
|            | 2002 - 2006 | 5.3 (2.7 to 8.1)       | 0.001  |
|            | 2006 - 2011 | 0.7 (-0.7 to 2.1)      | 0.314  |
|            | 2011 - 2016 | -3.6 (-5 to -2.3)      | <0.001 |
|            | 2016 - 2021 | 2.5 (1.3 to 3.8)       | 0.001  |
| Jordan     | 1990 - 1999 | 0.4 (0 to 0.8)         | 0.034  |
|            | 1999 - 2004 | -3 (-4.2 to -1.7)      | <0.001 |
|            | 2004 - 2009 | -11.4 (-12.3 to -10.6) | <0.001 |
|            | 2009 - 2012 | -4.2 (-6.8 to -1.6)    | 0.005  |
|            | 2012 - 2015 | -1.3 (-4.1 to 1.6)     | 0.351  |
|            | 2015 - 2018 | -5 (-7.9 to -2)        | 0.004  |
|            | 2018 - 2021 | -0.4 (-2.1 to 1.5)     | 0.681  |
| Kazakhstan | 1990 - 1993 | 14.1 (8.2 to 20.3)     | <0.001 |
|            | 1993 - 2007 | 2 (1.5 to 2.6)         | <0.001 |
|            | 2007 - 2021 | -6.9 (-7.3 to -6.4)    | <0.001 |

|                                  |             |                        |        |
|----------------------------------|-------------|------------------------|--------|
| Kenya                            | 1990 - 1996 | -0.8 (-1.2 to -0.4)    | 0.001  |
|                                  | 1996 - 1999 | 0.8 (-1.5 to 3.2)      | 0.459  |
|                                  | 1999 - 2004 | 3.3 (2.6 to 4)         | <0.001 |
|                                  | 2004 - 2011 | 0.6 (0.4 to 0.9)       | <0.001 |
|                                  | 2011 - 2015 | -1.8 (-2.5 to -1)      | <0.001 |
|                                  | 2015 - 2021 | -1 (-1.3 to -0.7)      | <0.001 |
| Kiribati                         | 1990 - 1993 | -0.2 (-0.5 to 0)       | 0.074  |
|                                  | 1993 - 1999 | -0.8 (-0.9 to -0.7)    | <0.001 |
|                                  | 1999 - 2004 | -0.4 (-0.6 to -0.2)    | <0.001 |
|                                  | 2004 - 2011 | 1 (0.9 to 1.1)         | <0.001 |
|                                  | 2011 - 2015 | -1 (-1.3 to -0.6)      | <0.001 |
|                                  | 2015 - 2021 | -1.2 (-1.3 to -1.1)    | <0.001 |
| Kuwait                           | 1990 - 1998 | 6.3 (3.4 to 9.3)       | <0.001 |
|                                  | 1998 - 2002 | 16.4 (4 to 30.3)       | 0.011  |
|                                  | 2002 - 2005 | -8.7 (-24.8 to 11)     | 0.341  |
|                                  | 2005 - 2008 | -33.2 (-46.8 to -16.3) | 0.001  |
|                                  | 2008 - 2021 | 5 (3.4 to 6.6)         | <0.001 |
| Kyrgyzstan                       | 1990 - 2001 | 1.1 (0.6 to 1.6)       | <0.001 |
|                                  | 2001 - 2004 | -7.3 (-13.7 to -0.5)   | 0.037  |
|                                  | 2004 - 2012 | 1.1 (0.1 to 2.1)       | 0.027  |
|                                  | 2012 - 2021 | -4.5 (-5.2 to -3.7)    | <0.001 |
| Lao People's Democratic Republic | 1990 - 1994 | -0.9 (-2 to 0.2)       | 0.095  |
|                                  | 1994 - 2012 | -2.1 (-2.2 to -2)      | <0.001 |
|                                  | 2012 - 2021 | -1.3 (-1.6 to -1.1)    | <0.001 |
| Latvia                           | 1990 - 1994 | 8.6 (6.3 to 11)        | <0.001 |
|                                  | 1994 - 2003 | -4.4 (-5.2 to -3.7)    | <0.001 |
|                                  | 2003 - 2012 | -1 (-1.8 to -0.2)      | 0.022  |
|                                  | 2012 - 2021 | -6.4 (-7.1 to -5.6)    | <0.001 |
| Lebanon                          | 1990 - 2003 | -3.5 (-3.7 to -3.4)    | <0.001 |
|                                  | 2003 - 2010 | -0.3 (-0.7 to 0.1)     | 0.108  |
|                                  | 2010 - 2015 | 1.5 (0.8 to 2.2)       | <0.001 |
|                                  | 2015 - 2018 | -6.7 (-8.5 to -4.7)    | <0.001 |
|                                  | 2018 - 2021 | -2.4 (-3.4 to -1.4)    | <0.001 |
| Lesotho                          | 1990 - 1993 | -2.4 (-4.1 to -0.8)    | 0.007  |
|                                  | 1993 - 1997 | 2 (0.5 to 3.6)         | 0.014  |
|                                  | 1997 - 2000 | 12.3 (9 to 15.8)       | <0.001 |
|                                  | 2000 - 2005 | 7.5 (6.5 to 8.4)       | <0.001 |
|                                  | 2005 - 2015 | 1 (0.8 to 1.2)         | <0.001 |
|                                  | 2015 - 2021 | 0 (-0.4 to 0.4)        | 0.922  |
| Liberia                          | 1990 - 1992 | -7.1 (-14.4 to 0.9)    | 0.079  |
|                                  | 1992 - 1999 | 3.6 (1.9 to 5.3)       | <0.001 |
|                                  | 1999 - 2006 | -0.9 (-2.9 to 1.1)     | 0.365  |
|                                  | 2006 - 2013 | 4.3 (2.1 to 6.5)       | 0.001  |

|                  |             |                      |        |
|------------------|-------------|----------------------|--------|
| Libya            | 2013 - 2021 | -2.2 (-3.5 to -0.9)  | 0.003  |
|                  | 1990 - 1996 | -0.4 (-1.4 to 0.6)   | 0.392  |
|                  | 1996 - 2003 | 2.2 (1.3 to 3.1)     | <0.001 |
|                  | 2003 - 2006 | -7.2 (-11.8 to -2.4) | 0.006  |
|                  | 2006 - 2010 | 8.9 (6.2 to 11.8)    | <0.001 |
| Lithuania        | 2010 - 2021 | -0.7 (-1.1 to -0.3)  | 0.001  |
|                  | 1990 - 1994 | 14.6 (9.3 to 20.1)   | <0.001 |
|                  | 1994 - 2014 | -0.7 (-1.1 to -0.3)  | 0.001  |
|                  | 2014 - 2017 | -14.1 (-26.1 to 0)   | 0.049  |
| Luxembourg       | 2017 - 2021 | -3.9 (-10.2 to 2.8)  | 0.233  |
|                  | 1990 - 1994 | -1.4 (-6.1 to 3.5)   | 0.542  |
|                  | 1994 - 1999 | -8.9 (-12.5 to -5.2) | <0.001 |
|                  | 1999 - 2004 | -1.1 (-5.2 to 3.3)   | 0.597  |
|                  | 2004 - 2008 | -9.6 (-15.8 to -2.9) | 0.009  |
|                  | 2008 - 2011 | 1.8 (-10.6 to 16)    | 0.765  |
|                  | 2011 - 2015 | -9.4 (-15.3 to -3.1) | 0.008  |
| Madagascar       | 2015 - 2021 | 1.6 (-1.1 to 4.3)    | 0.217  |
|                  | 1990 - 2006 | -0.9 (-1 to -0.8)    | <0.001 |
|                  | 2006 - 2021 | 0.2 (0 to 0.3)       | 0.038  |
| Malawi           | 1990 - 2000 | 1.6 (1.3 to 1.8)     | <0.001 |
|                  | 2000 - 2004 | -0.4 (-1.7 to 0.9)   | 0.489  |
|                  | 2004 - 2008 | -2.5 (-3.7 to -1.3)  | 0.001  |
|                  | 2008 - 2011 | -0.7 (-3 to 1.5)     | 0.493  |
|                  | 2011 - 2014 | -2.5 (-4.8 to -0.2)  | 0.038  |
|                  | 2014 - 2019 | 0 (-0.8 to 0.9)      | 0.967  |
|                  | 2019 - 2021 | -1.8 (-4.7 to 1.3)   | 0.236  |
| Malaysia         | 1990 - 2009 | -2.3 (-3 to -1.7)    | <0.001 |
|                  | 2009 - 2021 | -0.2 (-1.6 to 1.3)   | 0.797  |
| Maldives         | 1990 - 1997 | -5.4 (-6.2 to -4.6)  | <0.001 |
|                  | 1997 - 2000 | 8.7 (2 to 15.9)      | 0.013  |
|                  | 2000 - 2006 | -4.2 (-5.6 to -2.8)  | <0.001 |
|                  | 2006 - 2014 | -0.6 (-1.4 to 0.2)   | 0.123  |
|                  | 2014 - 2021 | -3.7 (-4.6 to -2.8)  | <0.001 |
| Mali             | 1990 - 1996 | 0.4 (0.1 to 0.8)     | 0.028  |
|                  | 1996 - 1999 | -1.1 (-3.4 to 1.2)   | 0.304  |
|                  | 1999 - 2002 | 1.3 (-1.2 to 3.7)    | 0.294  |
|                  | 2002 - 2006 | -0.7 (-1.9 to 0.5)   | 0.238  |
|                  | 2006 - 2017 | 0.5 (0.3 to 0.7)     | <0.001 |
|                  | 2017 - 2021 | -1.4 (-2.1 to -0.6)  | 0.002  |
| Malta            | 1990 - 2013 | -0.7 (-1.1 to -0.3)  | 0.001  |
|                  | 2013 - 2019 | -8 (-11.6 to -4.3)   | <0.001 |
|                  | 2019 - 2021 | 25.4 (2.4 to 53.5)   | 0.03   |
| Marshall Islands | 1990 - 1995 | -5 (-6.7 to -3.3)    | <0.001 |
|                  | 1995 - 2005 | 1.5 (0.8 to 2.2)     | <0.001 |

|                                  |             |                      |        |
|----------------------------------|-------------|----------------------|--------|
|                                  | 2005 - 2021 | -0.7 (-1 to -0.4)    | <0.001 |
| Mauritania                       | 1990 - 2018 | -0.9 (-1 to -0.8)    | <0.001 |
|                                  | 2018 - 2021 | 1.3 (-1.3 to 4.1)    | 0.318  |
| Mauritius                        | 1990 - 1997 | -1.2 (-2.6 to 0.3)   | 0.111  |
|                                  | 1997 - 2004 | -9.1 (-10.9 to -7.3) | <0.001 |
|                                  | 2004 - 2021 | 1.9 (1.3 to 2.4)     | <0.001 |
| Mexico                           | 1990 - 1993 | 4 (1.2 to 6.9)       | 0.008  |
|                                  | 1993 - 1997 | 8.1 (5.7 to 10.6)    | <0.001 |
|                                  | 1997 - 2007 | 0.6 (0.1 to 1)       | 0.013  |
|                                  | 2007 - 2011 | 7.3 (4.9 to 9.7)     | <0.001 |
|                                  | 2011 - 2021 | 0.9 (0.5 to 1.4)     | <0.001 |
| Micronesia (Federated States of) | 1990 - 1994 | -0.2 (-0.4 to 0)     | 0.069  |
|                                  | 1994 - 1999 | -1 (-1.1 to -0.8)    | <0.001 |
|                                  | 1999 - 2003 | -1.4 (-1.6 to -1.1)  | <0.001 |
|                                  | 2003 - 2006 | 0.1 (-0.4 to 0.6)    | 0.758  |
|                                  | 2006 - 2021 | -0.2 (-0.2 to -0.2)  | <0.001 |
| Monaco                           | 1990 - 1999 | -0.1 (-0.2 to 0)     | 0.054  |
|                                  | 1999 - 2008 | -1.5 (-1.6 to -1.4)  | <0.001 |
|                                  | 2008 - 2012 | -0.9 (-1.3 to -0.5)  | <0.001 |
|                                  | 2012 - 2017 | -1.8 (-2.1 to -1.5)  | <0.001 |
|                                  | 2017 - 2021 | -0.1 (-0.4 to 0.3)   | 0.618  |
| Mongolia                         | 1990 - 1994 | 8.6 (1.6 to 16)      | 0.018  |
|                                  | 1994 - 2001 | -6.5 (-9.8 to -3)    | 0.001  |
|                                  | 2001 - 2012 | 4 (2.5 to 5.4)       | <0.001 |
|                                  | 2012 - 2021 | -5 (-6.5 to -3.5)    | <0.001 |
| Montenegro                       | 1990 - 1996 | -3.6 (-7 to -0.1)    | 0.042  |
|                                  | 1996 - 1999 | 23.9 (2.2 to 50.1)   | 0.031  |
|                                  | 1999 - 2002 | -12.9 (-27.1 to 4.2) | 0.122  |
|                                  | 2002 - 2005 | 3.1 (-12.8 to 22.1)  | 0.705  |
|                                  | 2005 - 2021 | -3 (-3.8 to -2.3)    | <0.001 |
| Morocco                          | 1990 - 1993 | 0.9 (0.3 to 1.6)     | 0.006  |
|                                  | 1993 - 2002 | -0.6 (-0.7 to -0.4)  | <0.001 |
|                                  | 2002 - 2009 | -1.9 (-2.1 to -1.7)  | <0.001 |
|                                  | 2009 - 2014 | -3.1 (-3.5 to -2.7)  | <0.001 |
|                                  | 2014 - 2018 | -4.2 (-4.7 to -3.6)  | <0.001 |
|                                  | 2018 - 2021 | -1.8 (-2.5 to -1.1)  | <0.001 |
| Mozambique                       | 1990 - 1993 | -0.9 (-1.8 to 0)     | 0.048  |
|                                  | 1993 - 1997 | 2 (1.1 to 3)         | <0.001 |
|                                  | 1997 - 2003 | 0.6 (0.2 to 1)       | 0.011  |
|                                  | 2003 - 2009 | 3.8 (3.4 to 4.2)     | <0.001 |
|                                  | 2009 - 2015 | 1 (0.6 to 1.4)       | <0.001 |
|                                  | 2015 - 2021 | -1.6 (-2 to -1.3)    | <0.001 |
| Myanmar                          | 1990 - 1998 | -0.3 (-0.5 to -0.1)  | 0.021  |

|             |             |                      |        |
|-------------|-------------|----------------------|--------|
|             | 1998 - 2005 | -1.7 (-2.1 to -1.4)  | <0.001 |
|             | 2005 - 2009 | -4.9 (-5.8 to -4)    | <0.001 |
|             | 2009 - 2012 | -3 (-4.8 to -1.2)    | 0.003  |
|             | 2012 - 2021 | -0.8 (-1 to -0.6)    | <0.001 |
| Namibia     | 1990 - 1997 | 1.8 (1.5 to 2.2)     | <0.001 |
|             | 1997 - 2000 | 4 (1.5 to 6.6)       | 0.004  |
|             | 2000 - 2003 | 1.6 (-0.9 to 4.2)    | 0.185  |
|             | 2003 - 2012 | -2.1 (-2.4 to -1.9)  | <0.001 |
|             | 2012 - 2015 | 0.8 (-2.1 to 3.9)    | 0.57   |
|             | 2015 - 2021 | -1.4 (-1.9 to -0.8)  | <0.001 |
| Nauru       | 1990 - 1994 | 0.4 (0 to 0.8)       | 0.037  |
|             | 1994 - 1999 | 2.1 (1.7 to 2.5)     | <0.001 |
|             | 1999 - 2004 | 0.8 (0.4 to 1.3)     | 0.001  |
|             | 2004 - 2009 | -0.4 (-0.8 to 0)     | 0.069  |
|             | 2009 - 2018 | -2.1 (-2.3 to -2)    | <0.001 |
|             | 2018 - 2021 | -0.8 (-1.4 to -0.1)  | 0.022  |
| Nepal       | 1990 - 1994 | -0.5 (-1 to 0)       | 0.037  |
|             | 1994 - 1999 | -1.6 (-2 to -1.1)    | <0.001 |
|             | 1999 - 2002 | -2.4 (-3.6 to -1.2)  | <0.001 |
|             | 2002 - 2009 | 0.4 (0.2 to 0.6)     | 0.001  |
|             | 2009 - 2021 | -1 (-1.1 to -0.9)    | <0.001 |
| Netherlands | 1990 - 1994 | 0.4 (-2.8 to 3.8)    | 0.779  |
|             | 1994 - 2008 | -2.6 (-3.1 to -2)    | <0.001 |
|             | 2008 - 2012 | 4.4 (-0.4 to 9.4)    | 0.072  |
|             | 2012 - 2015 | -3.6 (-11.3 to 4.7)  | 0.359  |
|             | 2015 - 2018 | 6.3 (-3.4 to 17)     | 0.192  |
|             | 2018 - 2021 | -2.7 (-8.3 to 3.3)   | 0.346  |
| New Zealand | 1990 - 1996 | 2.7 (1 to 4.4)       | 0.004  |
|             | 1996 - 2002 | -6.4 (-8.4 to -4.4)  | <0.001 |
|             | 2002 - 2012 | 0.6 (-0.2 to 1.4)    | 0.124  |
|             | 2012 - 2015 | -4.7 (-12.1 to 3.2)  | 0.217  |
|             | 2015 - 2018 | 2.7 (-6.3 to 12.6)   | 0.546  |
|             | 2018 - 2021 | -5.6 (-11.2 to 0.5)  | 0.067  |
| Nicaragua   | 1990 - 1996 | 9.5 (8.1 to 10.9)    | <0.001 |
|             | 1996 - 2000 | 2.3 (-1.3 to 6.1)    | 0.196  |
|             | 2000 - 2018 | -1.8 (-2.1 to -1.6)  | <0.001 |
|             | 2018 - 2021 | -9.3 (-13.1 to -5.4) | <0.001 |
| Niger       | 1990 - 2003 | 0.1 (-0.1 to 0.3)    | 0.361  |
|             | 2003 - 2010 | -2.3 (-3 to -1.6)    | <0.001 |
|             | 2010 - 2014 | 2.6 (0.2 to 5)       | 0.036  |
|             | 2014 - 2021 | -0.5 (-1.1 to 0.2)   | 0.178  |
| Nigeria     | 1990 - 2001 | 1 (0.9 to 1.1)       | <0.001 |
|             | 2001 - 2008 | -1.9 (-2.1 to -1.6)  | <0.001 |
|             | 2008 - 2014 | 0.3 (0 to 0.7)       | 0.061  |

|                          |             |                      |        |
|--------------------------|-------------|----------------------|--------|
|                          | 2014 - 2021 | -1.9 (-2.1 to -1.7)  | <0.001 |
| Niue                     | 1990 - 2018 | -0.7 (-1 to -0.4)    | <0.001 |
|                          | 2018 - 2021 | 20.3 (11.9 to 29.3)  | <0.001 |
| North Macedonia          | 1990 - 1999 | 1.7 (0.5 to 2.9)     | 0.006  |
|                          | 1999 - 2021 | -2.5 (-2.9 to -2.2)  | <0.001 |
| Northern Mariana Islands | 1990 - 1999 | -5.1 (-7.8 to -2.2)  | 0.001  |
|                          | 1999 - 2021 | 1.9 (1.2 to 2.5)     | <0.001 |
| Norway                   | 1990 - 2007 | -2.8 (-3.3 to -2.3)  | <0.001 |
|                          | 2007 - 2010 | 3.4 (-9.9 to 18.5)   | 0.621  |
|                          | 2010 - 2013 | -7.8 (-19.7 to 6)    | 0.24   |
|                          | 2013 - 2021 | 1.2 (-0.5 to 3)      | 0.15   |
| Oman                     | 1990 - 2008 | -0.7 (-1.1 to -0.3)  | 0.003  |
|                          | 2008 - 2017 | 4.4 (3.1 to 5.8)     | <0.001 |
|                          | 2017 - 2021 | -19 (-22.3 to -15.6) | <0.001 |
| Pakistan                 | 1990 - 1995 | 3.9 (3.6 to 4.2)     | <0.001 |
|                          | 1995 - 2003 | 0.9 (0.7 to 1.1)     | <0.001 |
|                          | 2003 - 2011 | -1.5 (-1.8 to -1.3)  | <0.001 |
|                          | 2011 - 2015 | 0.5 (-0.3 to 1.4)    | 0.208  |
|                          | 2015 - 2021 | -1.8 (-2.1 to -1.6)  | <0.001 |
| Palau                    | 1990 - 1995 | 2.5 (0.8 to 4.2)     | 0.007  |
|                          | 1995 - 2014 | 0.2 (0 to 0.4)       | 0.062  |
|                          | 2014 - 2021 | -1.6 (-2.2 to -0.9)  | <0.001 |
| Palestine                | 1990 - 2003 | -0.7 (-0.8 to -0.5)  | <0.001 |
|                          | 2003 - 2007 | -3.7 (-4.8 to -2.6)  | <0.001 |
|                          | 2007 - 2010 | -9.2 (-11.2 to -7.2) | <0.001 |
|                          | 2010 - 2014 | 18.2 (17 to 19.4)    | <0.001 |
|                          | 2014 - 2017 | -9.2 (-10.8 to -7.6) | <0.001 |
|                          | 2017 - 2021 | -0.4 (-1.1 to 0.3)   | 0.24   |
| Panama                   | 1990 - 1998 | 4.5 (3.3 to 5.8)     | <0.001 |
|                          | 1998 - 2008 | 0.5 (-0.4 to 1.3)    | 0.277  |
|                          | 2008 - 2021 | -1.9 (-2.5 to -1.3)  | <0.001 |
| Papua New Guinea         | 1990 - 2002 | 0.4 (-0.2 to 1)      | 0.152  |
|                          | 2002 - 2006 | -2.4 (-8 to 3.5)     | 0.396  |
|                          | 2006 - 2021 | 1.4 (0.9 to 1.9)     | <0.001 |
| Paraguay                 | 1990 - 1995 | 7.4 (5.8 to 9)       | <0.001 |
|                          | 1995 - 1998 | -0.8 (-6.7 to 5.4)   | 0.782  |
|                          | 1998 - 2004 | 4.2 (2.4 to 6)       | <0.001 |
|                          | 2004 - 2019 | 1.4 (0.9 to 1.8)     | <0.001 |
|                          | 2019 - 2021 | -8.8 (-17.6 to 1)    | 0.073  |
| Peru                     | 1990 - 1994 | 3.7 (1.4 to 6)       | 0.004  |
|                          | 1994 - 1998 | 0.2 (-2.8 to 3.3)    | 0.887  |
|                          | 1998 - 2006 | -2.2 (-3.1 to -1.2)  | <0.001 |
|                          | 2006 - 2011 | 1.7 (-0.9 to 4.4)    | 0.18   |
|                          | 2011 - 2016 | -3.1 (-5.8 to -0.4)  | 0.027  |



|                     |             |                       |        |
|---------------------|-------------|-----------------------|--------|
|                     | 2016 - 2019 | 8.5 (-1.3 to 19.3)    | 0.085  |
|                     | 2019 - 2021 | -10.9 (-19.9 to -1)   | 0.035  |
| Philippines         | 1990 - 1997 | -3.6 (-4.3 to -2.8)   | <0.001 |
|                     | 1997 - 2021 | 0.3 (0.2 to 0.4)      | <0.001 |
| Poland              | 1990 - 1999 | 2.6 (2 to 3.2)        | <0.001 |
|                     | 1999 - 2014 | 0.3 (0 to 0.5)        | 0.03   |
|                     | 2014 - 2017 | -7.5 (-12.4 to -2.3)  | 0.007  |
|                     | 2017 - 2021 | -2.9 (-5.6 to -0.2)   | 0.039  |
| Portugal            | 1990 - 2001 | -3.5 (-4.1 to -2.9)   | <0.001 |
|                     | 2001 - 2004 | -14.3 (-22.9 to -4.7) | 0.007  |
|                     | 2004 - 2009 | 1.5 (-1.6 to 4.7)     | 0.333  |
|                     | 2009 - 2013 | -6.1 (-10.3 to -1.7)  | 0.009  |
|                     | 2013 - 2021 | -1.1 (-2.4 to 0.2)    | 0.084  |
| Puerto Rico         | 1990 - 1995 | 2.5 (-0.3 to 5.4)     | 0.076  |
|                     | 1995 - 2012 | -2.9 (-3.4 to -2.4)   | <0.001 |
|                     | 2012 - 2021 | -4.8 (-6.4 to -3.2)   | <0.001 |
| Qatar               | 1990 - 1995 | -2.5 (-4.6 to -0.4)   | 0.021  |
|                     | 1995 - 2001 | 7 (4.8 to 9.2)        | <0.001 |
|                     | 2001 - 2018 | -2.9 (-3.3 to -2.6)   | <0.001 |
|                     | 2018 - 2021 | -16.1 (-21 to -10.9)  | <0.001 |
| Republic of Korea   | 1990 - 1997 | 1.1 (-0.6 to 2.8)     | 0.191  |
|                     | 1997 - 2001 | -5 (-7.3 to -2.6)     | 0.001  |
|                     | 2001 - 2006 | 1.4 (0.3 to 2.4)      | 0.017  |
|                     | 2006 - 2009 | 4.8 (-0.5 to 10.4)    | 0.074  |
|                     | 2009 - 2015 | -3.1 (-4.3 to -1.8)   | <0.001 |
|                     | 2015 - 2019 | 2.9 (-0.2 to 6)       | 0.062  |
|                     | 2019 - 2021 | -3 (-9.2 to 3.5)      | 0.322  |
| Republic of Moldova | 1990 - 1994 | 2.7 (-0.1 to 5.7)     | 0.062  |
|                     | 1994 - 2006 | -1.9 (-2.5 to -1.3)   | <0.001 |
|                     | 2006 - 2010 | 7.4 (2.5 to 12.4)     | 0.005  |
|                     | 2010 - 2016 | -3.2 (-5.2 to -1.2)   | 0.003  |
|                     | 2016 - 2021 | -7.6 (-10 to -5.1)    | <0.001 |
| Romania             | 1990 - 1994 | 4.1 (0.8 to 7.5)      | 0.016  |
|                     | 1994 - 2007 | -0.3 (-0.9 to 0.3)    | 0.385  |
|                     | 2007 - 2010 | 7.6 (-3.2 to 19.4)    | 0.163  |
|                     | 2010 - 2021 | -5.6 (-6.5 to -4.8)   | <0.001 |
| Russian Federation  | 1990 - 1994 | 14.2 (10.8 to 17.7)   | <0.001 |
|                     | 1994 - 2001 | 2.2 (0.1 to 4.3)      | 0.038  |
|                     | 2001 - 2008 | -0.8 (-2.2 to 0.7)    | 0.282  |
|                     | 2008 - 2013 | -5.3 (-8.1 to -2.4)   | 0.001  |
|                     | 2013 - 2021 | -10.1 (-11.7 to -8.6) | <0.001 |
| Rwanda              | 1990 - 1993 | 6.8 (5.2 to 8.5)      | <0.001 |
|                     | 1993 - 1996 | -4.8 (-8 to -1.5)     | 0.007  |
|                     | 1996 - 1999 | -0.9 (-4.1 to 2.4)    | 0.562  |

|                                  |             |                      |        |
|----------------------------------|-------------|----------------------|--------|
|                                  | 1999 - 2010 | -5.7 (-6 to -5.5)    | <0.001 |
|                                  | 2010 - 2021 | -1.1 (-1.4 to -0.8)  | <0.001 |
| Saint Kitts and Nevis            | 1990 - 1996 | 2.8 (0.8 to 4.9)     | 0.009  |
|                                  | 1996 - 2002 | -6.9 (-9.8 to -3.9)  | <0.001 |
|                                  | 2002 - 2021 | -0.8 (-1.4 to -0.3)  | 0.004  |
| Saint Lucia                      | 1990 - 2002 | -0.7 (-1.1 to -0.3)  | 0.001  |
|                                  | 2002 - 2006 | -3.4 (-6.7 to 0.1)   | 0.058  |
|                                  | 2006 - 2012 | 3.5 (1.9 to 5.1)     | <0.001 |
|                                  | 2012 - 2021 | -2.4 (-3.2 to -1.5)  | <0.001 |
| Saint Vincent and the Grenadines | 1990 - 1997 | -0.3 (-1.2 to 0.7)   | 0.526  |
|                                  | 1997 - 2001 | 2.3 (-1.3 to 6.1)    | 0.2    |
|                                  | 2001 - 2006 | -3.5 (-5.8 to -1)    | 0.009  |
|                                  | 2006 - 2009 | 2.7 (-5.3 to 11.4)   | 0.495  |
|                                  | 2009 - 2014 | -2.6 (-4.9 to -0.3)  | 0.032  |
|                                  | 2014 - 2021 | 0.1 (-1 to 1.3)      | 0.804  |
| Samoa                            | 1990 - 1995 | -0.9 (-1.1 to -0.8)  | <0.001 |
|                                  | 1995 - 2000 | -2.2 (-2.4 to -1.9)  | <0.001 |
|                                  | 2000 - 2003 | -3 (-3.8 to -2.1)    | <0.001 |
|                                  | 2003 - 2007 | -0.9 (-1.4 to -0.5)  | <0.001 |
|                                  | 2007 - 2016 | 1.3 (1.2 to 1.4)     | <0.001 |
|                                  | 2016 - 2021 | -1.2 (-1.4 to -1)    | <0.001 |
| San Marino                       | 1990 - 1999 | -0.7 (-0.9 to -0.6)  | <0.001 |
|                                  | 1999 - 2006 | -3.4 (-3.7 to -3.2)  | <0.001 |
|                                  | 2006 - 2019 | -0.5 (-0.6 to -0.4)  | <0.001 |
|                                  | 2019 - 2021 | -8.8 (-10.7 to -6.9) | <0.001 |
| Sao Tome and Principe            | 1990 - 2001 | 4.3 (2.6 to 6)       | <0.001 |
|                                  | 2001 - 2021 | -0.6 (-1.1 to 0)     | 0.041  |
| Saudi Arabia                     | 1990 - 1998 | -1 (-1.2 to -0.7)    | <0.001 |
|                                  | 1998 - 2002 | 1.2 (0.3 to 2)       | 0.011  |
|                                  | 2002 - 2006 | -1.8 (-2.4 to -1.1)  | <0.001 |
|                                  | 2006 - 2009 | -4.2 (-5.6 to -2.8)  | <0.001 |
|                                  | 2009 - 2012 | -2.4 (-4 to -0.7)    | 0.008  |
|                                  | 2012 - 2017 | 0.1 (-0.4 to 0.7)    | 0.596  |
|                                  | 2017 - 2021 | -1.8 (-2.5 to -1.1)  | <0.001 |
| Senegal                          | 1990 - 2021 | -0.1 (-0.3 to 0.1)   | 0.296  |
| Serbia                           | 1990 - 1997 | -0.9 (-1.8 to 0)     | 0.051  |
|                                  | 1997 - 2003 | -3.2 (-4.1 to -2.3)  | <0.001 |
|                                  | 2003 - 2008 | -7.8 (-9.2 to -6.4)  | <0.001 |
|                                  | 2008 - 2016 | -4.4 (-5.2 to -3.7)  | <0.001 |
|                                  | 2016 - 2019 | 0.3 (-6.6 to 7.7)    | 0.921  |
|                                  | 2019 - 2021 | -10 (-17.1 to -2.3)  | 0.016  |
| Seychelles                       | 1990 - 2012 | -0.9 (-1.3 to -0.5)  | <0.001 |
|                                  | 2012 - 2019 | 8.1 (4.4 to 12)      | <0.001 |

|                 |             |                        |                  |
|-----------------|-------------|------------------------|------------------|
|                 | 2019 - 2021 | -50.5 (-60.4 to -38.1) | <0.001           |
| Sierra Leone    | 1990 - 1994 | -1.4 (-2.8 to 0.1)     | 0.057            |
|                 | 1994 - 2000 | 1 (0 to 2.1)           | 0.058            |
|                 | 2000 - 2005 | 5.3 (3.8 to 6.9)       | <0.001           |
|                 | 2005 - 2009 | -1.6 (-3.7 to 0.6)     | 0.136            |
|                 | 2009 - 2017 | 1 (0.4 to 1.6)         | 0.002            |
|                 | 2017 - 2021 | -1 (-2.5 to 0.5)       | 0.175            |
| Singapore       | 1990 - 1995 | -3.9 (-6.2 to -1.6)    | 0.003            |
|                 | 1995 - 2002 | 1.8 (0 to 3.6)         | 0.053            |
|                 | 2002 - 2005 | -9.1 (-17.3 to -0.1)   | 0.048            |
|                 | 2005 - 2018 | -0.1 (-0.7 to 0.5)     | 0.656            |
|                 | 2018 - 2021 | 5.6 (-0.5 to 12)       | 0.068            |
| Slovakia        | 1990 - 1995 | -1.4 (-2.9 to 0.1)     | 0.066            |
|                 | 1995 - 1998 | 2.6 (-2.7 to 8.2)      | 0.313            |
|                 | 1998 - 2001 | -3.4 (-8.3 to 1.9)     | 0.186            |
|                 | 2001 - 2008 | 1.3 (0.3 to 2.3)       | 0.015            |
|                 | 2008 - 2019 | -2.4 (-2.9 to -1.8)    | <0.001           |
|                 | 2019 - 2021 | -8.9 (-17.4 to 0.4)    | 0.059            |
| Slovenia        | 1990 - 1999 | 0.1 (-1 to 1.3)        | 0.803            |
|                 | 1999 - 2016 | -4.1 (-4.6 to -3.7)    | <0.001           |
|                 | 2016 - 2021 | -9.9 (-13.4 to -6.3)   | <0.001           |
| Solomon Islands | 1990 - 2010 | -0.7 (-0.9 to -0.5)    | <0.001           |
|                 | 2010 - 2013 | 4 (-2 to 10.5)         | 0.185            |
|                 | 2013 - 2021 | -0.2 (-0.9 to 0.4)     | 0.434            |
| Somalia         | 1990 - 1992 | -0.8 (-2.2 to 0.5)     | 0.207            |
|                 | 1992 - 1996 | 5.1 (4.4 to 5.8)       | <0.001           |
|                 | 1996 - 2000 | 1.3 (0.6 to 2)         | 0.001            |
|                 | 2000 - 2006 | -1.4 (-1.7 to -1.1)    | <0.001           |
|                 | 2006 - 2009 | 0.8 (-0.5 to 2.2)      | 0.208            |
|                 | 2009 - 2015 | -1.1 (-1.4 to -0.9)    | <0.001           |
|                 | 2015 - 2021 | -0.5 (-0.7 to -0.3)    | <0.001           |
| South Africa    | 1990 - 1993 | 0.8 (-3.5 to 5.2)      | 0.704            |
|                 | 1993 - 2004 | 3.3 (2.8 to 3.9)       | <0.001           |
|                 | 2004 - 2008 | -1.2 (-3.8 to 1.6)     | 0.381            |
|                 | 2008 - 2011 | -4.7 (-9.5 to 0.4)     | 0.067            |
|                 | 2011 - 2021 | -1.3 (-1.9 to -0.8)    | <0.001           |
|                 | South Sudan | 1990 - 1995            | 4.3 (2.2 to 6.4) |
| 1995 - 2002     |             | -4.6 (-6.1 to -3.1)    | <0.001           |
| 2002 - 2007     |             | 3.6 (0.5 to 6.7)       | 0.023            |
| 2007 - 2010     |             | -1.8 (-10.8 to 8)      | 0.69             |
| 2010 - 2021     |             | 2.8 (2.2 to 3.5)       | <0.001           |
| Spain           | 1990 - 1997 | 0.6 (-0.8 to 2.1)      | 0.377            |
|                 | 1997 - 2010 | -4.1 (-4.7 to -3.5)    | <0.001           |
|                 | 2010 - 2013 | 4 (-6.7 to 16)         | 0.462            |

|                            |             |                      |        |
|----------------------------|-------------|----------------------|--------|
|                            | 2013 - 2021 | -2.4 (-3.8 to -0.9)  | 0.003  |
| Sri Lanka                  | 1990 - 1993 | -7.2 (-17.2 to 3.9)  | 0.182  |
|                            | 1993 - 1997 | 8.5 (-2.5 to 20.7)   | 0.126  |
|                            | 1997 - 2004 | -9.5 (-11.8 to -7.1) | <0.001 |
|                            | 2004 - 2015 | -5.6 (-6.7 to -4.5)  | <0.001 |
|                            | 2015 - 2021 | 2.3 (-4.6 to 9.6)    | 0.503  |
| Sudan                      | 1990 - 1994 | 0.2 (-0.2 to 0.6)    | 0.358  |
|                            | 1994 - 2001 | -0.8 (-1 to -0.6)    | <0.001 |
|                            | 2001 - 2006 | -2.3 (-2.7 to -1.8)  | <0.001 |
|                            | 2006 - 2012 | -0.6 (-1 to -0.3)    | 0.001  |
|                            | 2012 - 2016 | -2.1 (-2.8 to -1.3)  | <0.001 |
|                            | 2016 - 2019 | -0.9 (-2.4 to 0.6)   | 0.224  |
|                            | 2019 - 2021 | -2.5 (-4 to -1)      | 0.003  |
| Suriname                   | 1990 - 1993 | 5.5 (-1.3 to 12.8)   | 0.105  |
|                            | 1993 - 2001 | -6.6 (-8 to -5.3)    | <0.001 |
|                            | 2001 - 2007 | 6.7 (4.8 to 8.7)     | <0.001 |
|                            | 2007 - 2011 | -0.3 (-3.9 to 3.5)   | 0.875  |
|                            | 2011 - 2014 | -7.4 (-14.2 to 0.1)  | 0.053  |
|                            | 2014 - 2017 | 5.5 (-2.6 to 14.2)   | 0.17   |
|                            | 2017 - 2021 | -1.2 (-4 to 1.8)     | 0.402  |
|                            |             |                      |        |
| Sweden                     | 1990 - 1992 | -7.5 (-14.8 to 0.3)  | 0.058  |
|                            | 1992 - 2001 | -2.7 (-3.6 to -1.8)  | <0.001 |
|                            | 2001 - 2011 | 2.6 (1.8 to 3.4)     | <0.001 |
|                            | 2011 - 2016 | -2.5 (-5.2 to 0.2)   | 0.065  |
|                            | 2016 - 2019 | 2.6 (-5.7 to 11.7)   | 0.526  |
|                            | 2019 - 2021 | -11.3 (-22.6 to 1.7) | 0.081  |
| Switzerland                | 1990 - 1992 | 0.9 (-7.1 to 9.6)    | 0.822  |
|                            | 1992 - 2004 | -5.3 (-5.8 to -4.8)  | <0.001 |
|                            | 2004 - 2007 | 0.4 (-6.9 to 8.2)    | 0.92   |
|                            | 2007 - 2010 | -7 (-13.8 to 0.3)    | 0.059  |
|                            | 2010 - 2021 | -2 (-2.6 to -1.3)    | <0.001 |
| Syrian Arab Republic       | 1990 - 2000 | -1.2 (-1.6 to -0.9)  | <0.001 |
|                            | 2000 - 2003 | -8 (-11.4 to -4.4)   | <0.001 |
|                            | 2003 - 2008 | -4.2 (-5.3 to -3.2)  | <0.001 |
|                            | 2008 - 2011 | 0.5 (-3.6 to 4.9)    | 0.792  |
|                            | 2011 - 2016 | -4 (-5.5 to -2.4)    | <0.001 |
|                            | 2016 - 2021 | 2.6 (1.3 to 3.9)     | 0.001  |
| Taiwan (Province of China) | 1990 - 1998 | -0.1 (-0.9 to 0.7)   | 0.788  |
|                            | 1998 - 2005 | 5.1 (3.8 to 6.4)     | <0.001 |
|                            | 2005 - 2010 | -6.4 (-8.3 to -4.4)  | <0.001 |
|                            | 2010 - 2014 | 0.4 (-3.1 to 3.9)    | 0.829  |
|                            | 2014 - 2021 | 3.4 (2.1 to 4.6)     | <0.001 |
| Tajikistan                 | 1990 - 1995 | 7.5 (6.3 to 8.7)     | <0.001 |

|                     |             |                       |        |
|---------------------|-------------|-----------------------|--------|
|                     | 1995 - 2000 | -7.2 (-8.9 to -5.4)   | <0.001 |
|                     | 2000 - 2007 | -3.9 (-5 to -2.8)     | <0.001 |
|                     | 2007 - 2015 | 1.1 (-0.1 to 2.4)     | 0.064  |
|                     | 2015 - 2021 | -3.2 (-4.9 to -1.4)   | 0.001  |
| Thailand            | 1990 - 1996 | 7.2 (6.4 to 8)        | <0.001 |
|                     | 1996 - 1999 | -11.4 (-15.9 to -6.8) | <0.001 |
|                     | 1999 - 2008 | -4.4 (-4.9 to -3.9)   | <0.001 |
|                     | 2008 - 2013 | -1.9 (-3.2 to -0.5)   | 0.01   |
|                     | 2013 - 2021 | 0.5 (0 to 1.1)        | 0.044  |
| Timor-Leste         | 1990 - 2000 | -3 (-4.5 to -1.4)     | 0.001  |
|                     | 2000 - 2008 | -8.3 (-10.8 to -5.7)  | <0.001 |
|                     | 2008 - 2012 | 17.4 (6 to 30)        | 0.004  |
|                     | 2012 - 2021 | 0.5 (-1.2 to 2.3)     | 0.546  |
| Togo                | 1990 - 1998 | 2.6 (2.4 to 2.8)      | <0.001 |
|                     | 1998 - 2003 | 0.8 (0.3 to 1.4)      | 0.004  |
|                     | 2003 - 2006 | -0.7 (-2.4 to 0.9)    | 0.37   |
|                     | 2006 - 2009 | 2.7 (1.1 to 4.4)      | 0.003  |
|                     | 2009 - 2017 | -0.5 (-0.8 to -0.3)   | <0.001 |
|                     | 2017 - 2021 | -1.7 (-2.4 to -1.1)   | <0.001 |
| Tokelau             | 1990 - 2018 | -1.3 (-1.7 to -0.8)   | <0.001 |
|                     | 2018 - 2021 | 31.7 (18 to 47)       | <0.001 |
| Tonga               | 1990 - 1992 | -4.1 (-6.5 to -1.6)   | 0.003  |
|                     | 1992 - 1996 | -0.7 (-1.9 to 0.6)    | 0.276  |
|                     | 1996 - 1999 | 7 (4.7 to 9.3)        | <0.001 |
|                     | 1999 - 2021 | 0 (-0.1 to 0.1)       | 0.852  |
| Trinidad and Tobago | 1990 - 1994 | -8.4 (-10.7 to -6)    | <0.001 |
|                     | 1994 - 2006 | -0.4 (-1.1 to 0.2)    | 0.186  |
|                     | 2006 - 2009 | 4.1 (-6.8 to 16.3)    | 0.453  |
|                     | 2009 - 2012 | -7.4 (-17.3 to 3.7)   | 0.17   |
|                     | 2012 - 2021 | 0.8 (-1.1 to 2.7)     | 0.399  |
| Tunisia             | 1990 - 1992 | 5.1 (3.7 to 6.5)      | <0.001 |
|                     | 1992 - 1995 | -1.5 (-2.7 to -0.3)   | 0.021  |
|                     | 1995 - 2003 | -0.3 (-0.5 to -0.1)   | 0.002  |
|                     | 2003 - 2014 | -1.6 (-1.7 to -1.5)   | <0.001 |
|                     | 2014 - 2021 | -2.3 (-2.5 to -2.1)   | <0.001 |
| Türkiye             | 1990 - 1999 | -1.6 (-2 to -1.1)     | <0.001 |
|                     | 1999 - 2002 | -5.4 (-9.6 to -1)     | 0.022  |
|                     | 2002 - 2005 | 4.9 (1.3 to 8.6)      | 0.011  |
|                     | 2005 - 2009 | 1 (-0.4 to 2.3)       | 0.155  |
|                     | 2009 - 2012 | -1.9 (-4.1 to 0.4)    | 0.094  |
|                     | 2012 - 2017 | 2.7 (2 to 3.4)        | <0.001 |
|                     | 2017 - 2021 | -0.8 (-1.8 to 0.3)    | 0.134  |
| Turkmenistan        | 1990 - 1995 | 2.4 (0.8 to 4.1)      | 0.007  |
|                     | 1995 - 1998 | 13.8 (6.2 to 21.8)    | 0.001  |

|                                 |             |                       |        |
|---------------------------------|-------------|-----------------------|--------|
|                                 | 1998 - 2003 | -1.8 (-4 to 0.4)      | 0.107  |
|                                 | 2003 - 2006 | 5.2 (-2.7 to 13.8)    | 0.183  |
|                                 | 2006 - 2010 | -7.4 (-10.4 to -4.3)  | <0.001 |
|                                 | 2010 - 2021 | -0.8 (-1.5 to 0)      | 0.042  |
| Tuvalu                          | 1990 - 1994 | -2.8 (-3 to -2.5)     | <0.001 |
|                                 | 1994 - 1998 | -1.2 (-1.6 to -0.8)   | <0.001 |
|                                 | 1998 - 2002 | -2.4 (-2.8 to -2.1)   | <0.001 |
|                                 | 2002 - 2006 | -1.1 (-1.5 to -0.7)   | <0.001 |
|                                 | 2006 - 2012 | 0 (-0.2 to 0.2)       | 0.815  |
|                                 | 2012 - 2016 | -0.5 (-0.9 to -0.1)   | 0.017  |
|                                 | 2016 - 2021 | -1.1 (-1.3 to -0.9)   | <0.001 |
| Uganda                          | 1990 - 1995 | 7.5 (6.3 to 8.7)      | <0.001 |
|                                 | 1995 - 2001 | 1.8 (0.6 to 3)        | 0.004  |
|                                 | 2001 - 2011 | -2.9 (-3.4 to -2.5)   | <0.001 |
|                                 | 2011 - 2021 | -0.1 (-0.5 to 0.3)    | 0.533  |
| Ukraine                         | 1990 - 1995 | 9.8 (8.2 to 11.4)     | <0.001 |
|                                 | 1995 - 2000 | 1.7 (-0.4 to 3.8)     | 0.104  |
|                                 | 2000 - 2004 | -3 (-6.1 to 0.2)      | 0.063  |
|                                 | 2004 - 2013 | 1.2 (0.5 to 1.9)      | 0.002  |
|                                 | 2013 - 2021 | -4.1 (-5.6 to -2.6)   | <0.001 |
| United Arab Emirates            | 1990 - 2002 | -0.1 (-1.1 to 1)      | 0.879  |
|                                 | 2002 - 2005 | 12.5 (-4.1 to 31.9)   | 0.137  |
|                                 | 2005 - 2008 | -18.6 (-31.6 to -3.2) | 0.023  |
|                                 | 2008 - 2016 | 4.5 (1.9 to 7.2)      | 0.002  |
|                                 | 2016 - 2021 | -8.2 (-11.8 to -4.5)  | <0.001 |
| United Kingdom                  | 1990 - 1999 | -1.2 (-2 to -0.4)     | 0.008  |
|                                 | 1999 - 2004 | -6 (-9 to -2.9)       | 0.001  |
|                                 | 2004 - 2016 | -0.7 (-1.3 to 0)      | 0.039  |
|                                 | 2016 - 2021 | 2.4 (-0.7 to 5.6)     | 0.124  |
| United Republic of<br>Tanzania  | 1990 - 1998 | 0.3 (0.1 to 0.4)      | 0.001  |
|                                 | 1998 - 2001 | -2.1 (-3.3 to -0.8)   | 0.003  |
|                                 | 2001 - 2004 | -5.1 (-6.3 to -3.9)   | <0.001 |
|                                 | 2004 - 2009 | -0.2 (-0.5 to 0.2)    | 0.406  |
|                                 | 2009 - 2014 | -1.5 (-1.9 to -1.1)   | <0.001 |
|                                 | 2014 - 2021 | -0.2 (-0.4 to 0)      | 0.109  |
| United States of America        | 1990 - 1994 | 0.8 (-0.1 to 1.6)     | 0.069  |
|                                 | 1994 - 1999 | -4.7 (-5.6 to -3.9)   | <0.001 |
|                                 | 1999 - 2007 | -0.5 (-0.8 to -0.1)   | 0.016  |
|                                 | 2007 - 2014 | 2.7 (2.2 to 3.1)      | <0.001 |
|                                 | 2014 - 2017 | 6 (3.4 to 8.6)        | <0.001 |
|                                 | 2017 - 2021 | -1.2 (-2.4 to 0.1)    | 0.063  |
| United States Virgin<br>Islands | 1990 - 1996 | 3.4 (1.2 to 5.7)      | 0.005  |

|                                    |             |                       |        |
|------------------------------------|-------------|-----------------------|--------|
|                                    | 1996 - 2005 | -1.2 (-2.6 to 0.2)    | 0.091  |
|                                    | 2005 - 2018 | 5.4 (4.3 to 6.6)      | <0.001 |
|                                    | 2018 - 2021 | -14.7 (-23.5 to -5)   | 0.006  |
| Uruguay                            | 1990 - 2000 | 3 (2.1 to 3.9)        | <0.001 |
|                                    | 2000 - 2005 | -2 (-4.9 to 1)        | 0.187  |
|                                    | 2005 - 2021 | 2.8 (2.4 to 3.3)      | <0.001 |
| Uzbekistan                         | 1990 - 1995 | -0.2 (-1.1 to 0.7)    | 0.652  |
|                                    | 1995 - 2000 | 4.9 (3.5 to 6.4)      | <0.001 |
|                                    | 2000 - 2004 | -2.9 (-5.2 to -0.6)   | 0.018  |
|                                    | 2004 - 2007 | 6.3 (0.9 to 11.9)     | 0.025  |
|                                    | 2007 - 2010 | -1.8 (-6 to 2.7)      | 0.402  |
|                                    | 2010 - 2015 | 8.1 (6.8 to 9.4)      | <0.001 |
|                                    | 2015 - 2021 | -2.7 (-3.4 to -2)     | <0.001 |
| Vanuatu                            | 1990 - 1992 | 5.7 (2.7 to 8.8)      | 0.001  |
|                                    | 1992 - 2000 | 0 (-0.4 to 0.3)       | 0.852  |
|                                    | 2000 - 2003 | -4.1 (-6.2 to -1.9)   | 0.001  |
|                                    | 2003 - 2007 | 1.7 (0.5 to 2.9)      | 0.008  |
|                                    | 2007 - 2021 | -0.3 (-0.4 to -0.2)   | <0.001 |
| Venezuela (Bolivarian Republic of) | 1990 - 1998 | 6.3 (5.3 to 7.3)      | <0.001 |
|                                    | 1998 - 2001 | -3.6 (-12.2 to 5.7)   | 0.415  |
|                                    | 2001 - 2021 | 1.3 (0.9 to 1.7)      | <0.001 |
| Viet Nam                           | 1990 - 1997 | -2.6 (-2.7 to -2.5)   | <0.001 |
|                                    | 1997 - 2001 | -2 (-2.3 to -1.7)     | <0.001 |
|                                    | 2001 - 2005 | 1.2 (0.8 to 1.5)      | <0.001 |
|                                    | 2005 - 2008 | 0.4 (-0.2 to 1.1)     | 0.182  |
|                                    | 2008 - 2013 | 1.3 (1.1 to 1.5)      | <0.001 |
|                                    | 2013 - 2016 | -1 (-1.7 to -0.3)     | 0.009  |
|                                    | 2016 - 2021 | -2.1 (-2.3 to -2)     | <0.001 |
| Yemen                              | 1990 - 2008 | 2.4 (2 to 2.8)        | <0.001 |
|                                    | 2008 - 2011 | -10.3 (-19.4 to -0.2) | 0.046  |
|                                    | 2011 - 2021 | -1.8 (-2.8 to -0.9)   | 0.001  |
| Zambia                             | 1990 - 1995 | 4.7 (4.3 to 5.1)      | <0.001 |
|                                    | 1995 - 1998 | 1.1 (-0.8 to 3)       | 0.233  |
|                                    | 1998 - 2008 | -1.5 (-1.7 to -1.3)   | <0.001 |
|                                    | 2008 - 2011 | -0.3 (-2 to 1.4)      | 0.699  |
|                                    | 2011 - 2014 | -2.7 (-4.6 to -0.9)   | 0.008  |
|                                    | 2014 - 2017 | -0.7 (-2.8 to 1.5)    | 0.513  |
|                                    | 2017 - 2021 | -1.8 (-2.7 to -1)     | <0.001 |
| Zimbabwe                           | 1990 - 1997 | 0.8 (-0.7 to 2.3)     | 0.28   |
|                                    | 1997 - 2002 | 12.5 (9.3 to 15.9)    | <0.001 |
|                                    | 2002 - 2021 | 0.8 (0.5 to 1)        | <0.001 |

**Table S6. Wald  $\chi^2$  test of suicide mortality in age, period, and cohort models in global and 5 SDI regions**

| SDI     | Sex    | $\chi^2$ test                | $\chi^2$    | df | P value |
|---------|--------|------------------------------|-------------|----|---------|
| Global  | Both   | All Age Deviations = 0       | 2995.011005 | 1  | <0.001  |
|         |        | All Cohort Deviations = 0    | 3.148493979 | 6  | 0.790   |
|         |        | All Cohort RR = 1            | 1416.518558 | 7  | <0.001  |
|         |        | All Local Drifts = Net Drift | 2.050099544 | 3  | 0.562   |
|         |        | All Period Deviations = 0    | 10.34440803 | 4  | 0.035   |
|         |        | All Period RR = 1            | 871.1414084 | 5  | <0.001  |
|         | Male   | NetDrift = 0                 | 787.9582978 | 1  | <0.001  |
|         |        | All Age Deviations = 0       | 4366.920373 | 1  | <0.001  |
|         |        | All Cohort Deviations = 0    | 53.15597945 | 6  | <0.001  |
|         |        | All Cohort RR = 1            | 2376.073527 | 7  | <0.001  |
|         |        | All Local Drifts = Net Drift | 49.34366504 | 3  | <0.001  |
|         |        | All Period Deviations = 0    | 28.71667292 | 4  | <0.001  |
|         | Female | All Period RR = 1            | 1565.680221 | 5  | <0.001  |
|         |        | NetDrift = 0                 | 1473.465765 | 1  | <0.001  |
|         |        | All Age Deviations = 0       | 1459.236562 | 1  | <0.001  |
|         |        | All Cohort Deviations = 0    | 6.682091438 | 6  | 0.351   |
|         |        | All Cohort RR = 1            | 645.7503303 | 7  | <0.001  |
|         |        | All Local Drifts = Net Drift | 5.196416625 | 3  | 0.158   |
| Low SDI | Both   | All Period Deviations = 0    | 14.7081822  | 4  | 0.005   |
|         |        | All Period RR = 1            | 374.3464104 | 5  | <0.001  |
|         |        | NetDrift = 0                 | 316.2720957 | 1  | <0.001  |
|         |        | All Age Deviations = 0       | 2187.915784 | 1  | <0.001  |
|         |        | All Cohort Deviations = 0    | 16.67405947 | 6  | 0.011   |
|         |        | All Cohort RR = 1            | 668.8712556 | 7  | <0.001  |
|         | Male   | All Local Drifts = Net Drift | 10.28185273 | 3  | 0.016   |
|         |        | All Period Deviations = 0    | 20.09939153 | 4  | <0.001  |
|         |        | All Period RR = 1            | 647.1285841 | 5  | <0.001  |
|         |        | NetDrift = 0                 | 536.1618165 | 1  | <0.001  |
|         |        | All Age Deviations = 0       | 333.3321428 | 1  | <0.001  |
|         |        | All Cohort Deviations = 0    | 15.68834457 | 6  | 0.016   |
|         | Female | All Cohort RR = 1            | 139.1191826 | 7  | <0.001  |
|         |        | All Local Drifts = Net Drift | 12.56095746 | 3  | 0.006   |
|         |        | All Period Deviations = 0    | 14.32923245 | 4  | 0.006   |
|         |        | All Period RR = 1            | 150.0053259 | 5  | <0.001  |
|         |        | NetDrift = 0                 | 128.6618158 | 1  | <0.001  |
|         |        | All Age Deviations = 0       | 2034.802958 | 1  | <0.001  |
|         | Female | All Cohort Deviations = 0    | 8.673000025 | 6  | 0.193   |
|         |        | All Cohort RR = 1            | 568.6481187 | 7  | <0.001  |
|         |        | All Local Drifts = Net Drift | 7.441187671 | 3  | 0.059   |
|         |        | All Period Deviations = 0    | 27.28886669 | 4  | <0.001  |
|         |        | All Period RR = 1            | 484.2065374 | 5  | <0.001  |



|                 |        |                              |             |   |        |
|-----------------|--------|------------------------------|-------------|---|--------|
| Low-middle SDI  | Both   | NetDrift = 0                 | 359.964061  | 1 | <0.001 |
|                 |        | All Age Deviations = 0       | 2247.989003 | 1 | <0.001 |
|                 |        | All Cohort Deviations = 0    | 1.255648609 | 6 | 0.974  |
|                 |        | All Cohort RR = 1            | 1036.46032  | 7 | <0.001 |
|                 |        | All Local Drifts = Net Drift | 0.275104687 | 3 | 0.965  |
|                 |        | All Period Deviations = 0    | 43.74810234 | 4 | <0.001 |
|                 | Male   | All Period RR = 1            | 684.2599719 | 5 | <0.001 |
|                 |        | NetDrift = 0                 | 523.9547257 | 1 | <0.001 |
|                 |        | All Age Deviations = 0       | 1438.854342 | 1 | <0.001 |
|                 |        | All Cohort Deviations = 0    | 11.16731482 | 6 | 0.083  |
|                 |        | All Cohort RR = 1            | 630.6965204 | 7 | <0.001 |
|                 |        | All Local Drifts = Net Drift | 10.12656326 | 3 | 0.018  |
|                 | Female | All Period Deviations = 0    | 24.72828824 | 4 | <0.001 |
|                 |        | All Period RR = 1            | 521.688706  | 5 | <0.001 |
|                 |        | NetDrift = 0                 | 406.4914314 | 1 | <0.001 |
|                 |        | All Age Deviations = 0       | 2543.645764 | 1 | <0.001 |
|                 |        | All Cohort Deviations = 0    | 16.25327826 | 6 | 0.012  |
|                 |        | All Cohort RR = 1            | 1259.562899 | 7 | <0.001 |
| Middle SDI      | Both   | All Local Drifts = Net Drift | 14.00457884 | 3 | 0.003  |
|                 |        | All Period Deviations = 0    | 76.19982275 | 4 | <0.001 |
|                 |        | All Period RR = 1            | 731.7155456 | 5 | <0.001 |
|                 |        | NetDrift = 0                 | 534.4525099 | 1 | <0.001 |
|                 |        | All Age Deviations = 0       | 1254.232671 | 1 | <0.001 |
|                 |        | All Cohort Deviations = 0    | 7.203638869 | 6 | 0.302  |
|                 | Male   | All Cohort RR = 1            | 746.5190757 | 7 | <0.001 |
|                 |        | All Local Drifts = Net Drift | 6.392635439 | 3 | 0.094  |
|                 |        | All Period Deviations = 0    | 18.00912042 | 4 | 0.001  |
|                 |        | All Period RR = 1            | 449.4114983 | 5 | <0.001 |
|                 |        | NetDrift = 0                 | 441.4675452 | 1 | <0.001 |
|                 |        | All Age Deviations = 0       | 2877.788678 | 1 | <0.001 |
|                 | Female | All Cohort Deviations = 0    | 113.0821768 | 6 | <0.001 |
|                 |        | All Cohort RR = 1            | 1558.811914 | 7 | <0.001 |
|                 |        | All Local Drifts = Net Drift | 111.5396058 | 3 | <0.001 |
|                 |        | All Period Deviations = 0    | 160.2741971 | 4 | <0.001 |
|                 |        | All Period RR = 1            | 1108.28327  | 5 | <0.001 |
|                 |        | NetDrift = 0                 | 1071.728624 | 1 | <0.001 |
| High-middle SDI | Both   | All Age Deviations = 0       | 532.7201086 | 1 | <0.001 |
|                 |        | All Cohort Deviations = 0    | 5.185404727 | 6 | 0.520  |
|                 |        | All Cohort RR = 1            | 355.5788809 | 7 | <0.001 |
|                 |        | All Local Drifts = Net Drift | 4.521186611 | 3 | 0.210  |
|                 |        | All Period Deviations = 0    | 1.213085582 | 4 | 0.876  |
|                 |        | All Period RR = 1            | 192.722118  | 5 | <0.001 |
|                 |        | NetDrift = 0                 | 181.6966658 | 1 | <0.001 |
|                 |        | All Age Deviations = 0       | 823.0813886 | 1 | <0.001 |

|          |        |                              |             |   |        |
|----------|--------|------------------------------|-------------|---|--------|
|          |        | All Cohort Deviations = 0    | 15.14802254 | 6 | 0.019  |
|          |        | All Cohort RR = 1            | 1173.958155 | 7 | <0.001 |
|          |        | All Local Drifts = Net Drift | 11.14454952 | 3 | 0.011  |
|          |        | All Period Deviations = 0    | 12.97897984 | 4 | 0.011  |
|          |        | All Period RR = 1            | 612.4385871 | 5 | <0.001 |
|          |        | NetDrift = 0                 | 572.179916  | 1 | <0.001 |
|          | Male   | All Age Deviations = 0       | 384.9593461 | 1 | <0.001 |
|          |        | All Cohort Deviations = 0    | 18.30833462 | 6 | 0.006  |
|          |        | All Cohort RR = 1            | 601.1861773 | 7 | <0.001 |
|          |        | All Local Drifts = Net Drift | 13.0898038  | 3 | 0.004  |
|          |        | All Period Deviations = 0    | 10.34579145 | 4 | 0.035  |
|          |        | All Period RR = 1            | 309.0251109 | 5 | <0.001 |
|          |        | NetDrift = 0                 | 280.4245493 | 1 | <0.001 |
|          | Female | All Age Deviations = 0       | 2257.984898 | 1 | <0.001 |
|          |        | All Cohort Deviations = 0    | 17.63935306 | 6 | 0.007  |
|          |        | All Cohort RR = 1            | 2794.414996 | 7 | <0.001 |
|          |        | All Local Drifts = Net Drift | 12.39721107 | 3 | 0.006  |
|          |        | All Period Deviations = 0    | 16.65391197 | 4 | 0.002  |
|          |        | All Period RR = 1            | 1520.089788 | 5 | <0.001 |
|          |        | NetDrift = 0                 | 1463.084095 | 1 | <0.001 |
| High SDI | Both   | All Age Deviations = 0       | 3248.960804 | 1 | <0.001 |
|          |        | All Cohort Deviations = 0    | 28.11572194 | 6 | <0.001 |
|          |        | All Cohort RR = 1            | 120.1583768 | 7 | <0.001 |
|          |        | All Local Drifts = Net Drift | 26.36980175 | 3 | <0.001 |
|          |        | All Period Deviations = 0    | 66.49141206 | 4 | <0.001 |
|          |        | All Period RR = 1            | 68.89905736 | 5 | <0.001 |
|          |        | NetDrift = 0                 | 15.29937942 | 1 | <0.001 |
|          | Male   | All Age Deviations = 0       | 3013.44654  | 1 | <0.001 |
|          |        | All Cohort Deviations = 0    | 19.1162837  | 6 | 0.004  |
|          |        | All Cohort RR = 1            | 178.7896051 | 7 | <0.001 |
|          |        | All Local Drifts = Net Drift | 17.43655862 | 3 | 0.001  |
|          |        | All Period Deviations = 0    | 84.65538084 | 4 | <0.001 |
|          |        | All Period RR = 1            | 103.0770469 | 5 | <0.001 |
|          |        | NetDrift = 0                 | 47.32271587 | 1 | <0.001 |
|          | Female | All Age Deviations = 0       | 984.2296309 | 1 | <0.001 |
|          |        | All Cohort Deviations = 0    | 25.7876288  | 6 | <0.001 |
|          |        | All Cohort RR = 1            | 25.78883629 | 7 | 0.001  |
|          |        | All Local Drifts = Net Drift | 23.83506614 | 3 | <0.001 |
|          |        | All Period Deviations = 0    | 5.952670944 | 4 | 0.203  |
|          |        | All Period RR = 1            | 18.17274853 | 5 | 0.003  |
|          |        | NetDrift = 0                 | 7.890004068 | 1 | 0.005  |

---

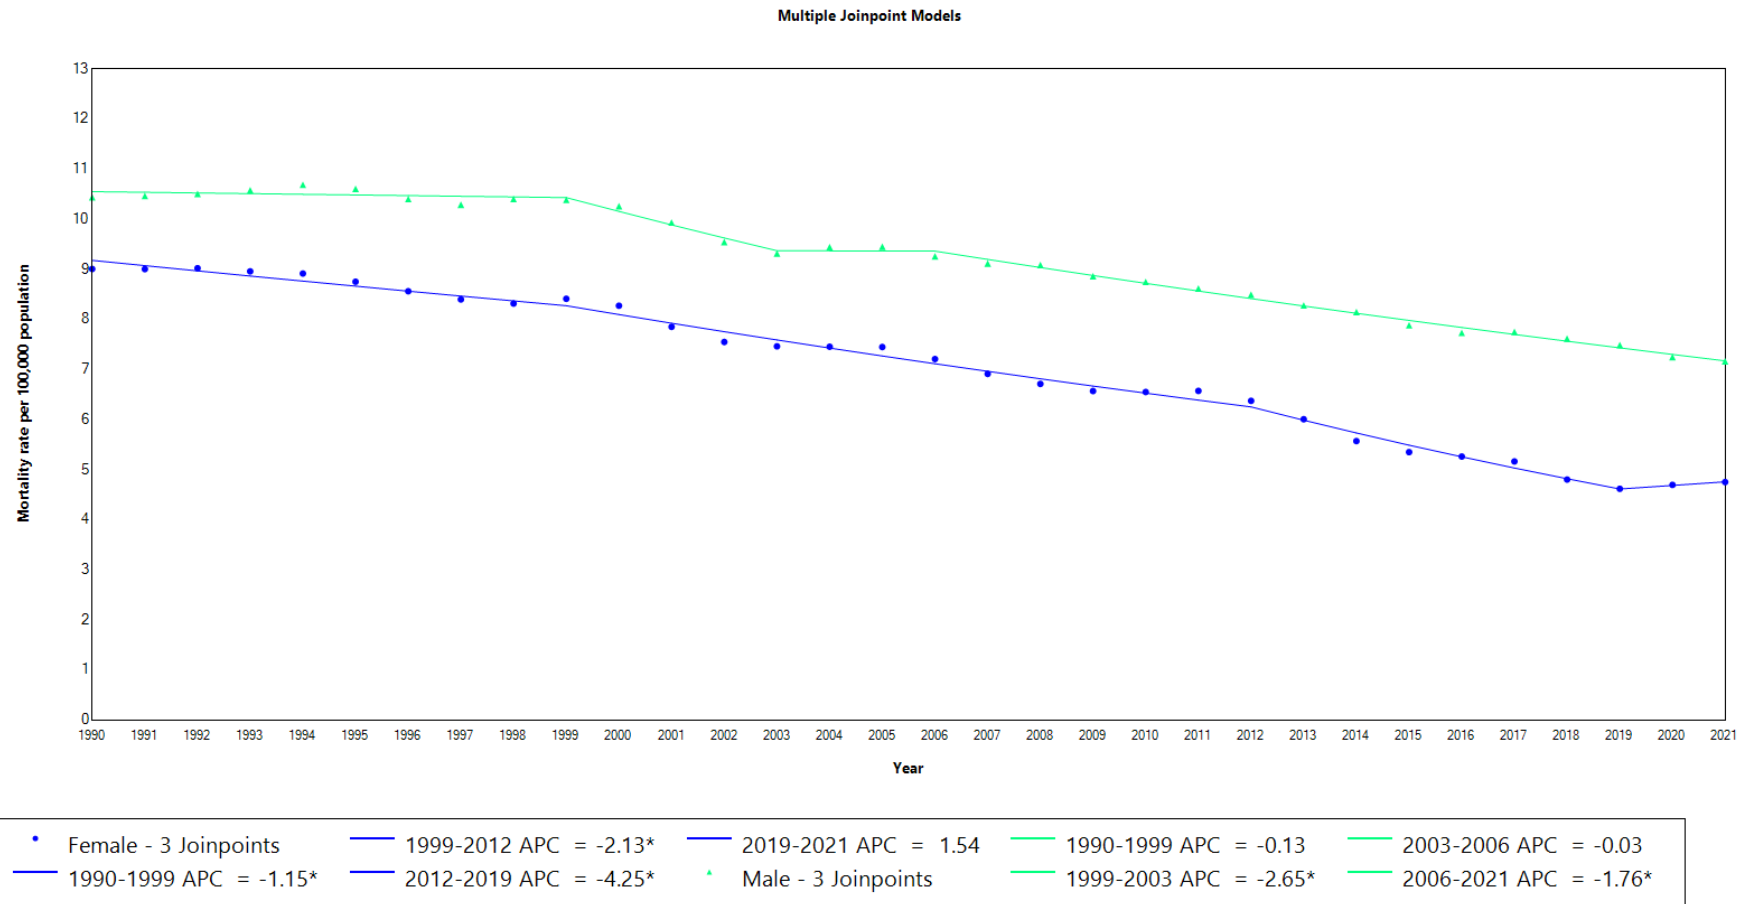

**Figure S1. Joinpoint regression analysis of mortality from suicide in different sexes from 1990 to 2021**

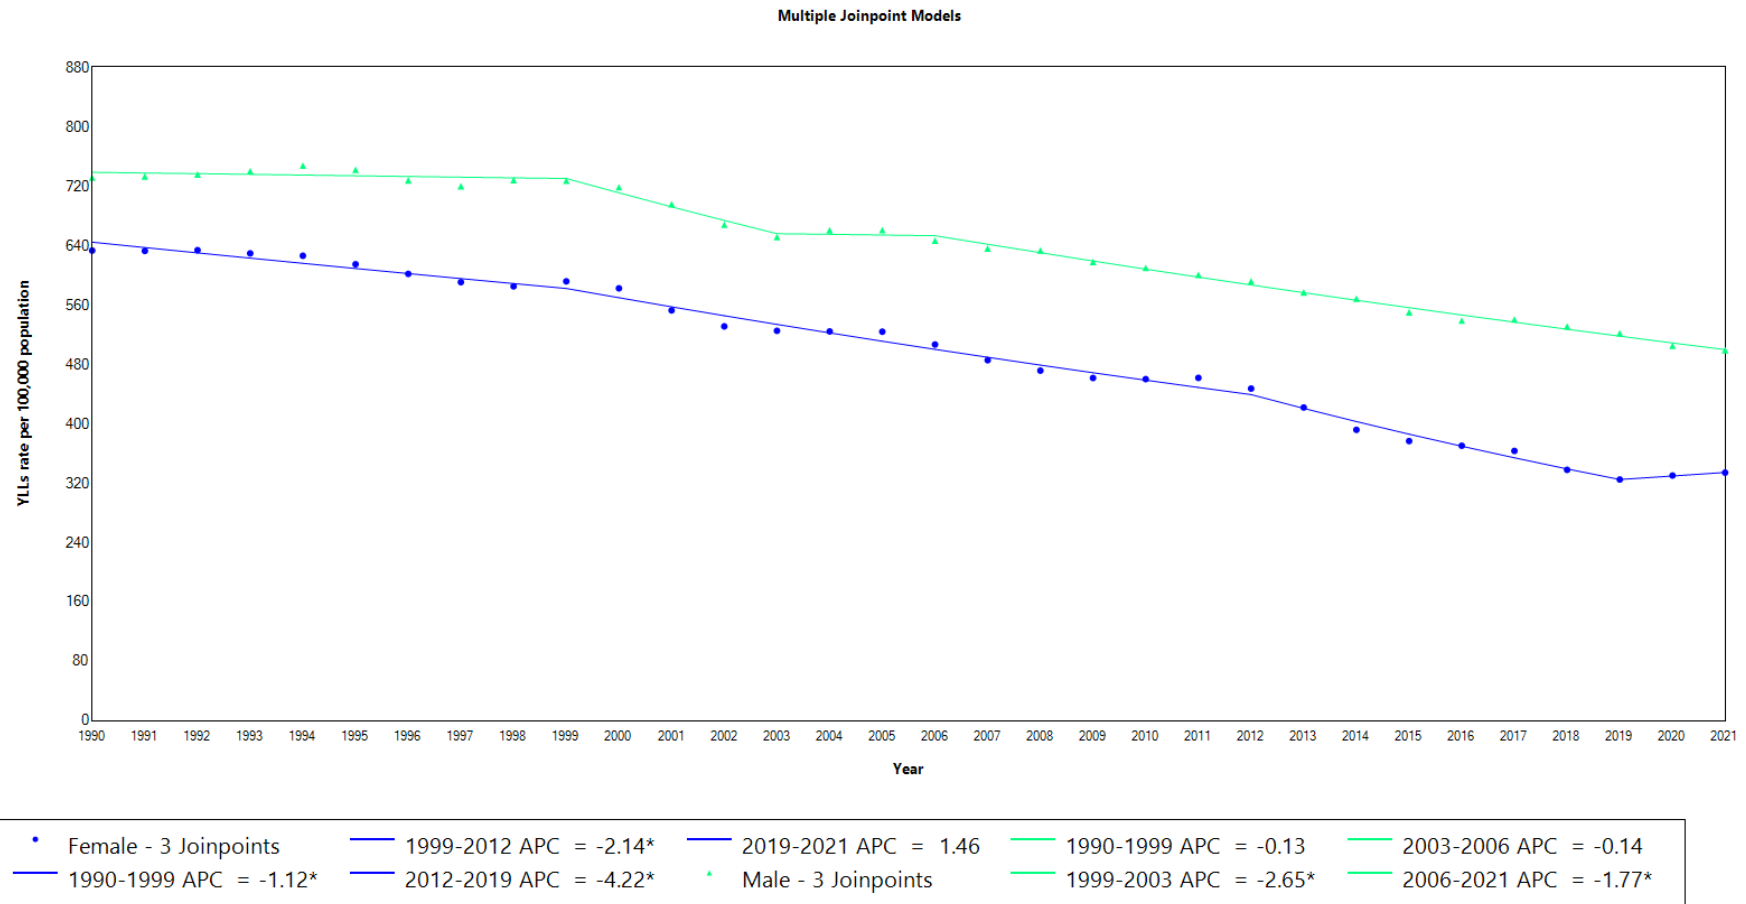

**Figure S2. Joinpoint regression analysis of rate of YLLs from suicide in different sexes from 1990 to 2021**

Multiple Joinpoint Models

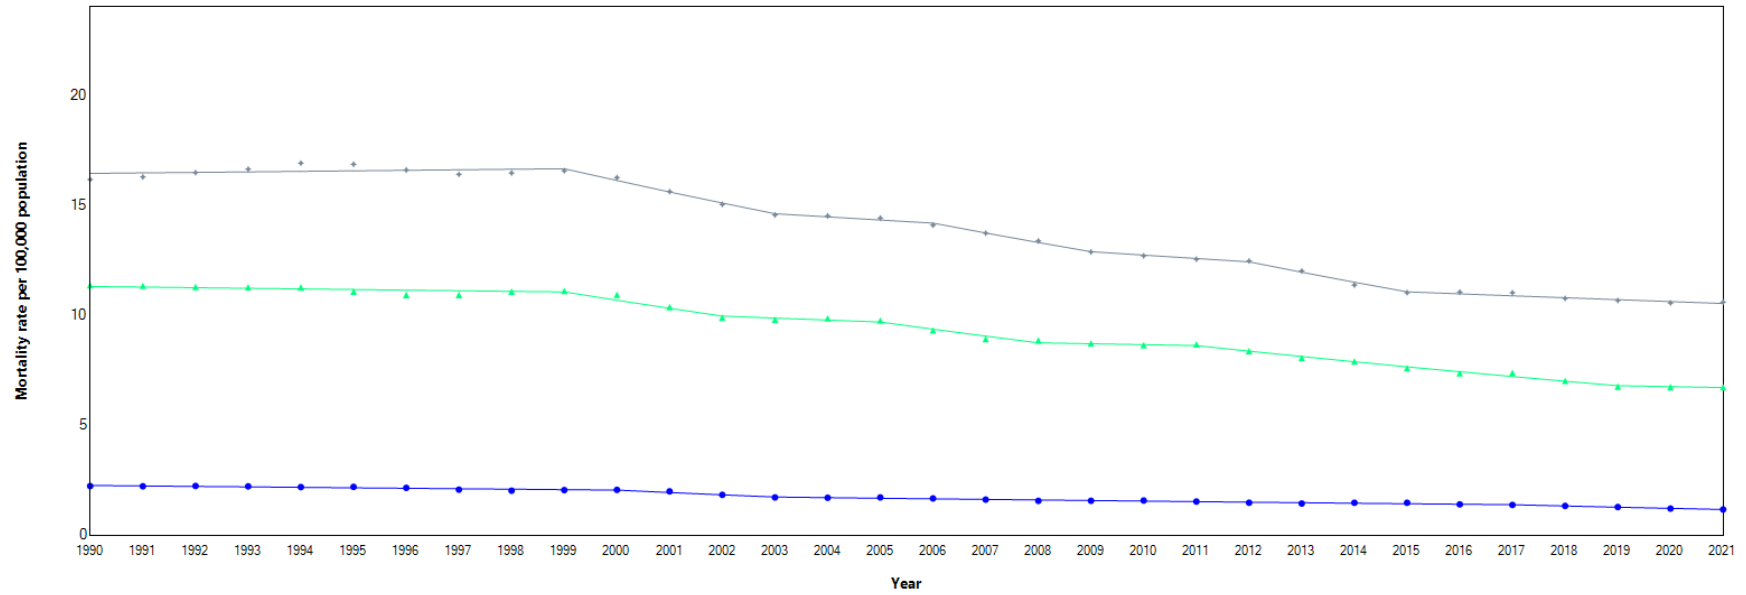

|                              |                          |                              |                          |
|------------------------------|--------------------------|------------------------------|--------------------------|
| • 10-14 years - 3 Joinpoints | — 1990-1999 APC = -0.25  | — 2011-2019 APC = -2.93*     | — 2003-2006 APC = -0.99  |
| — 1990-2000 APC = -0.97*     | — 1999-2002 APC = -3.43* | — 2019-2021 APC = -0.63      | — 2006-2009 APC = -3.15* |
| — 2000-2003 APC = -5.44*     | — 2002-2005 APC = -0.91  | * 20-24 years - 6 Joinpoints | — 2009-2012 APC = -1.21  |
| — 2003-2017 APC = -1.60*     | — 2005-2008 APC = -3.37* | — 1990-1999 APC = 0.14       | — 2012-2015 APC = -3.80* |
| — 2017-2021 APC = -4.16*     | — 2008-2011 APC = -0.48  | — 1999-2003 APC = -3.22*     | — 2015-2021 APC = -0.81* |
| ▲ 15-19 years - 6 Joinpoints |                          |                              |                          |

Figure S3. Joinpoint regression analysis of mortality from suicide in different age groups from 1990 to 2021

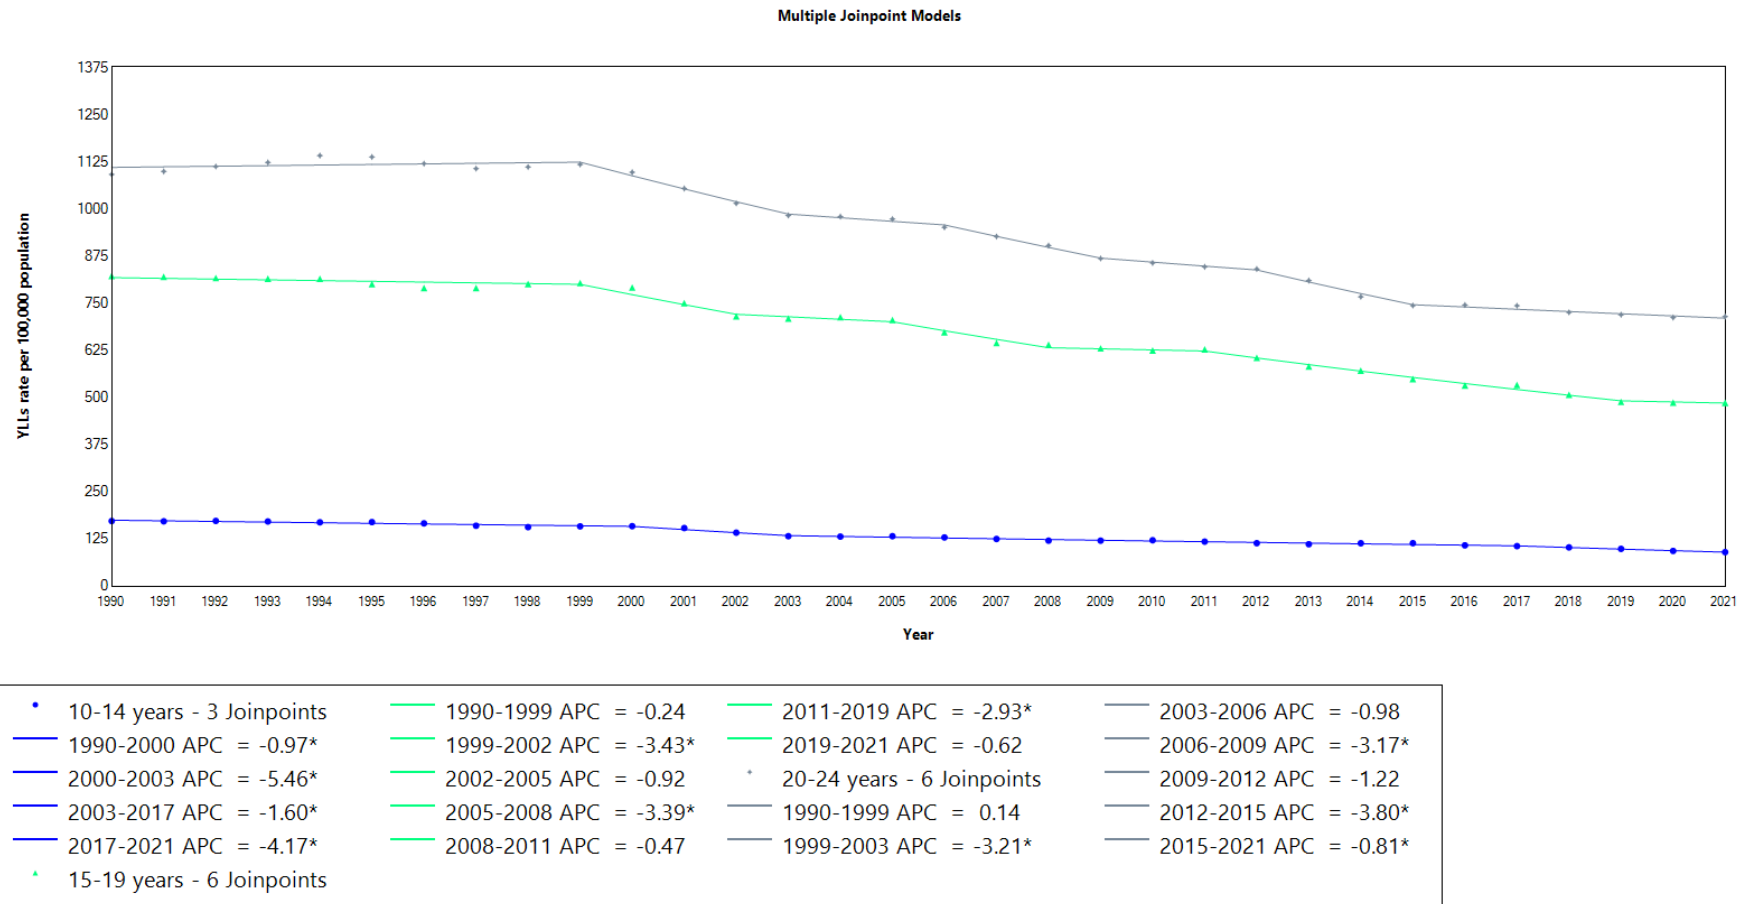

**Figure S4. Joinpoint regression analysis of rate of YLLs from suicide in different age groups from 1990 to 2021**

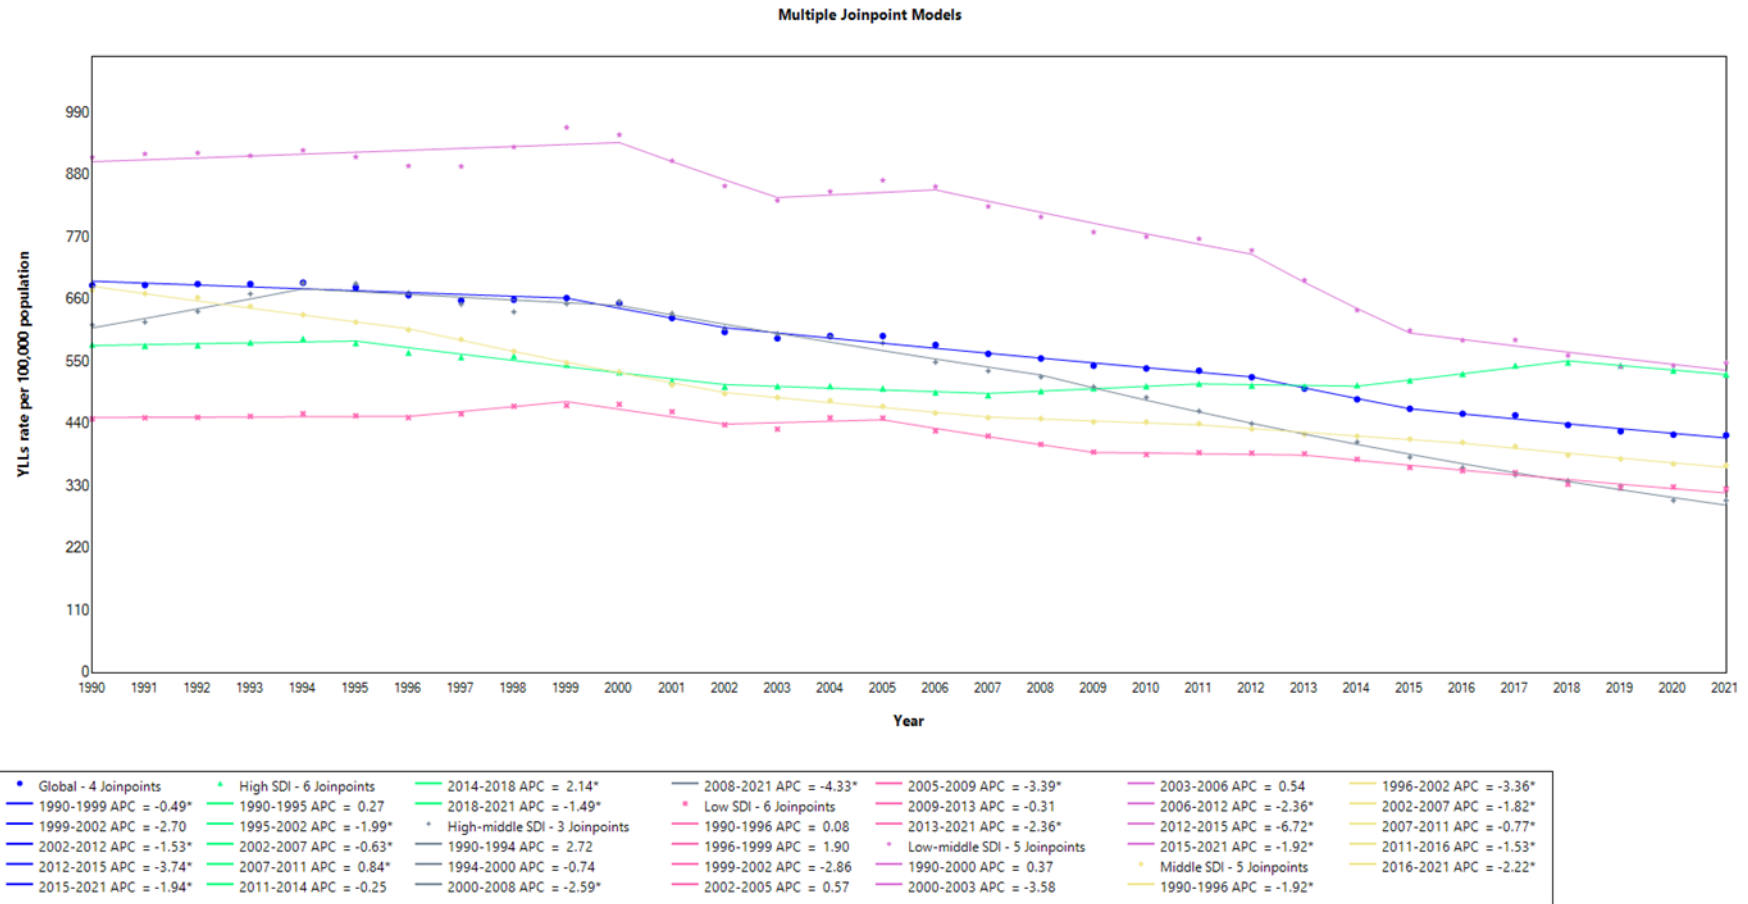

**Figure S5. Joinpoint regression analysis of rate of suicide YLLs aged 10–24 years in global and 5 SDI regions from 1990 to 2021**

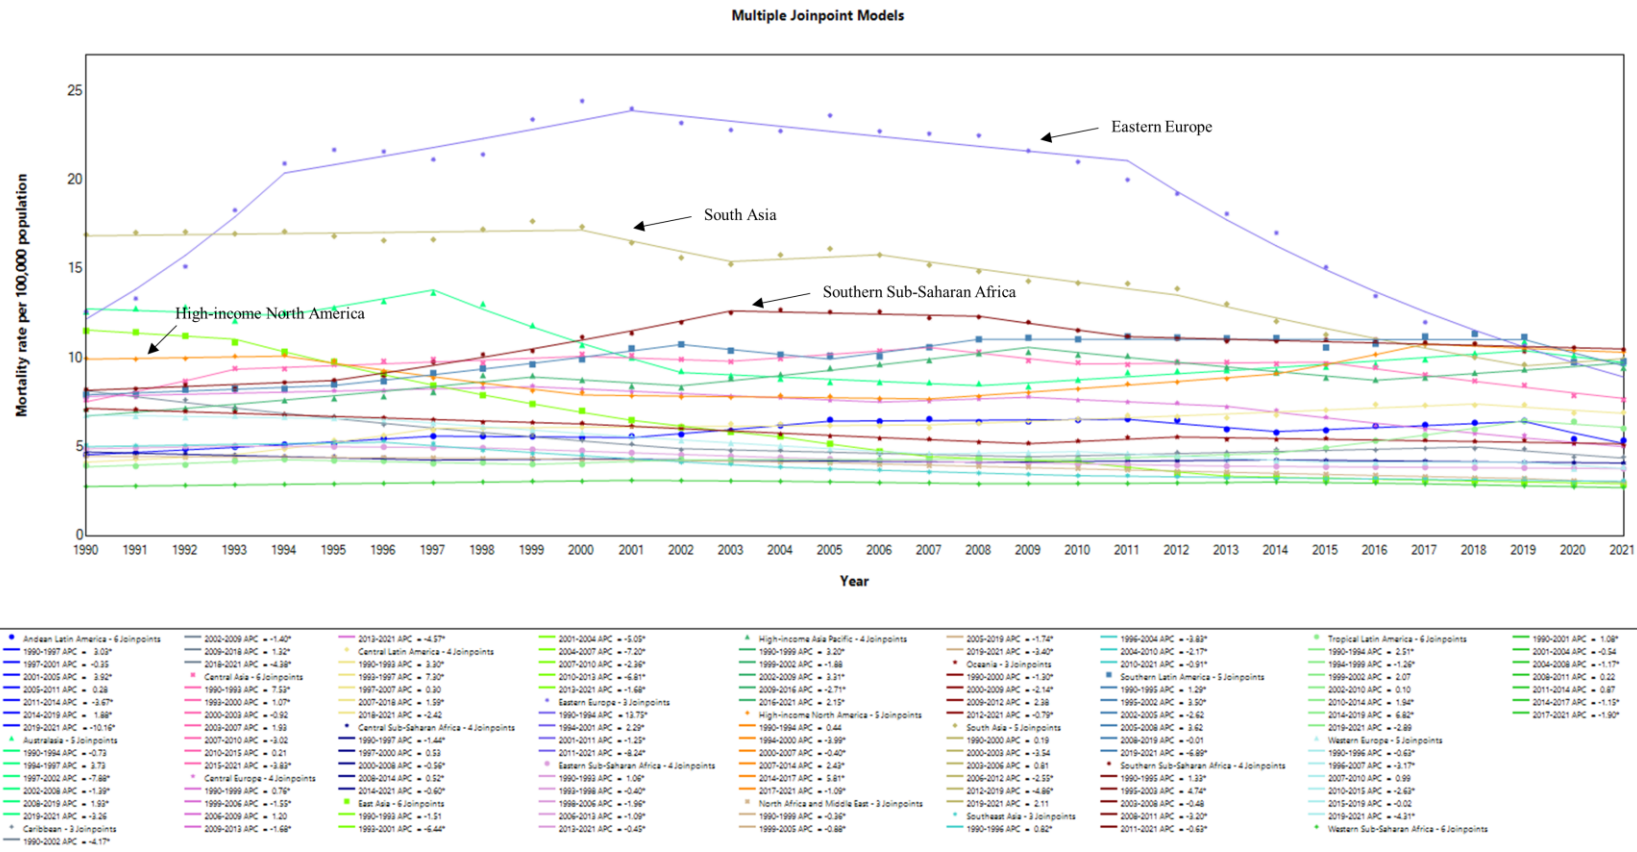

**Figure S6. Joinpoint regression analysis of mortality from suicide in 21 regions from 1990 to 2021**



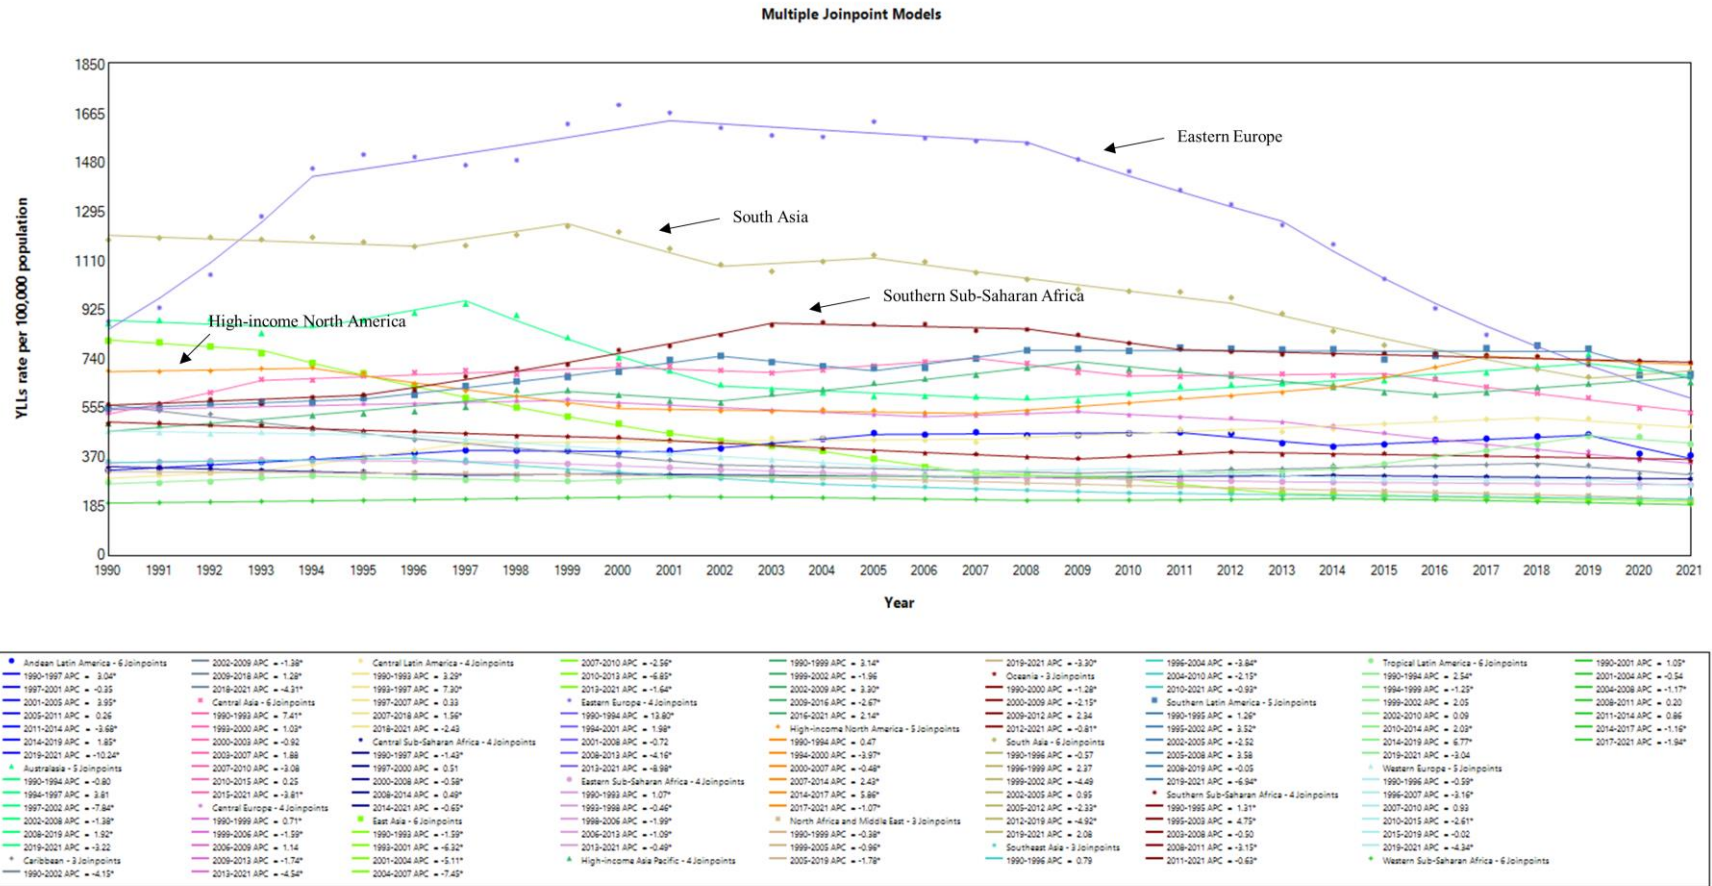

Figure S7. Joinpoint regression analysis of rate of YLLs from suicide in 21 regions from 1990 to 2021

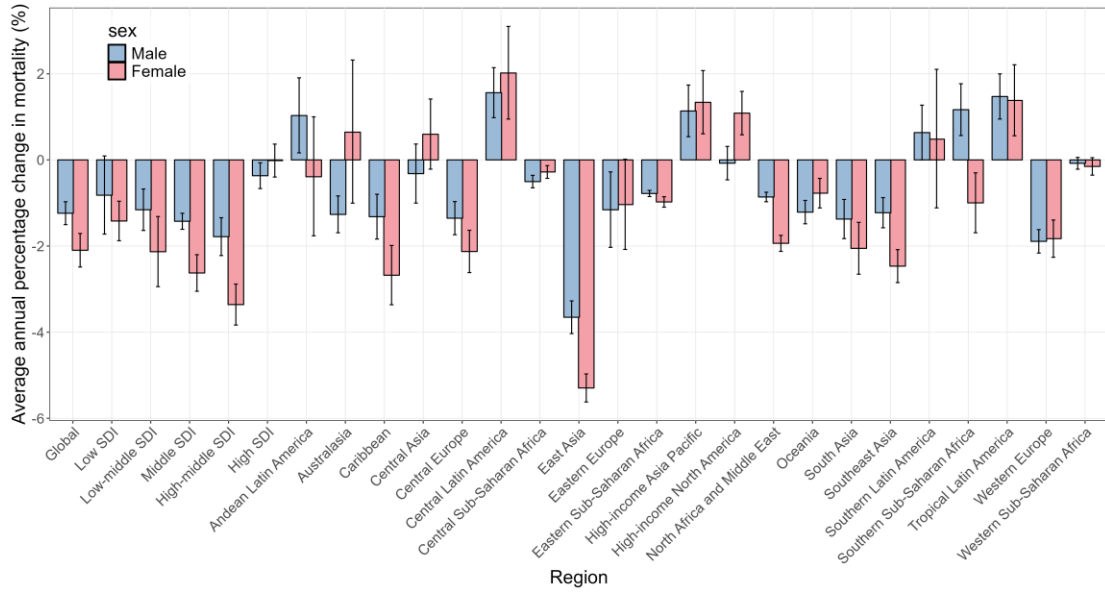

**Figure S8. Jointpoint regression analysis of mortality from suicide among males and females in global and different regions, 1990-2021**

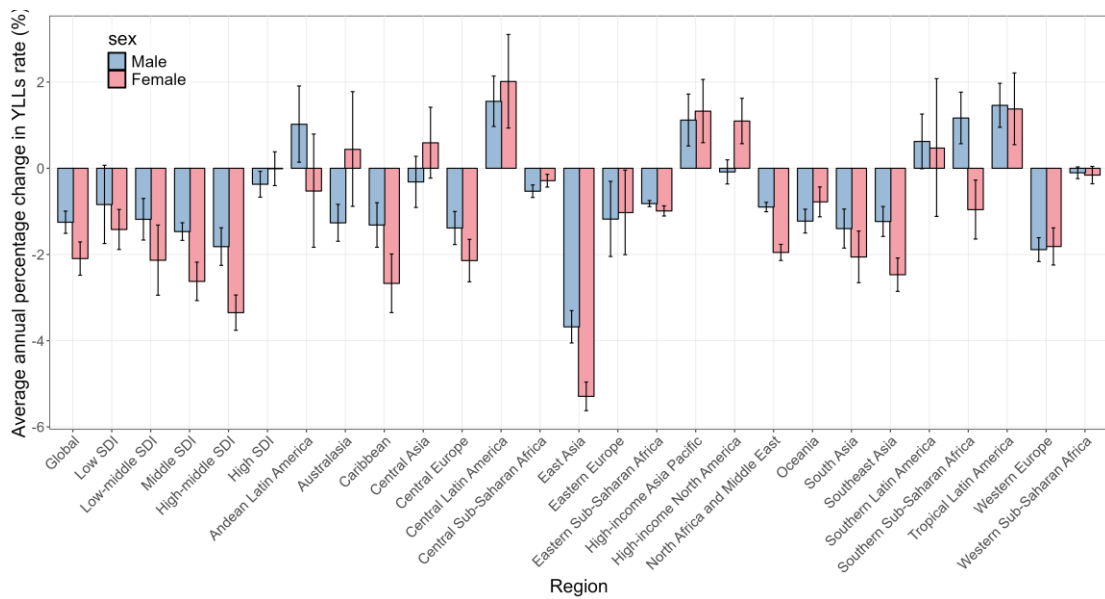

**Figure S9. Jointpoint regression analysis of rate of YLLs from suicide among males and females in global and different regions, 1990-2021**

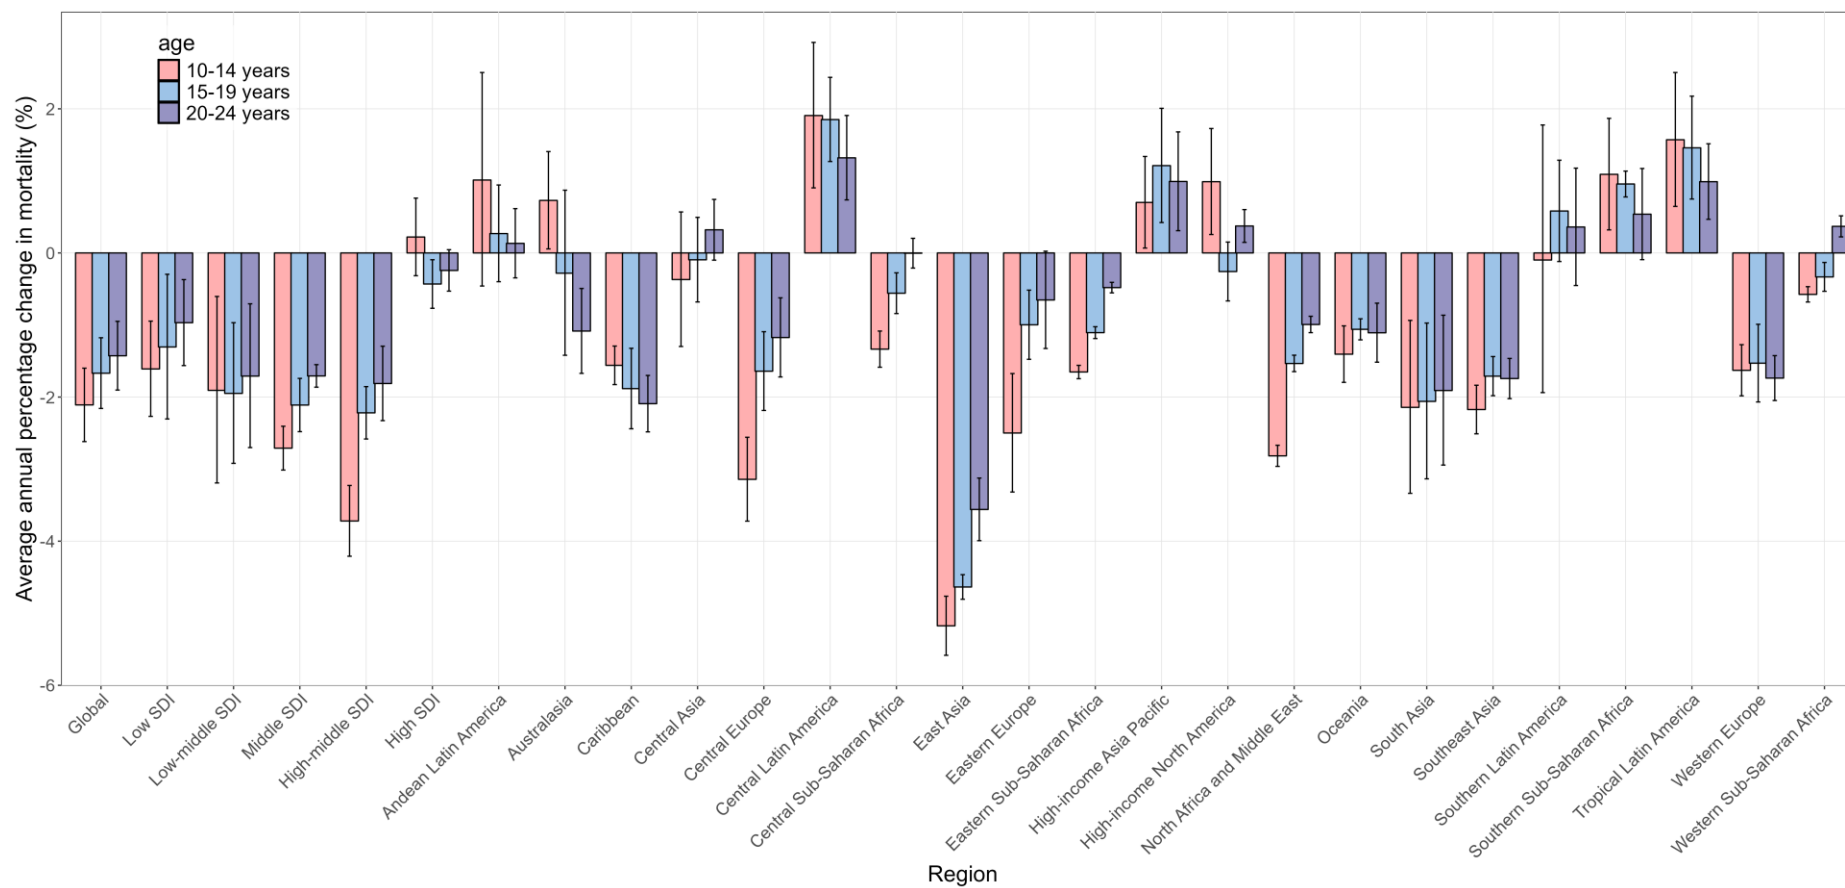

**Figure S10. Joinpoint regression analysis of mortality from suicide among different age groups in global and different regions, 1990-2021**

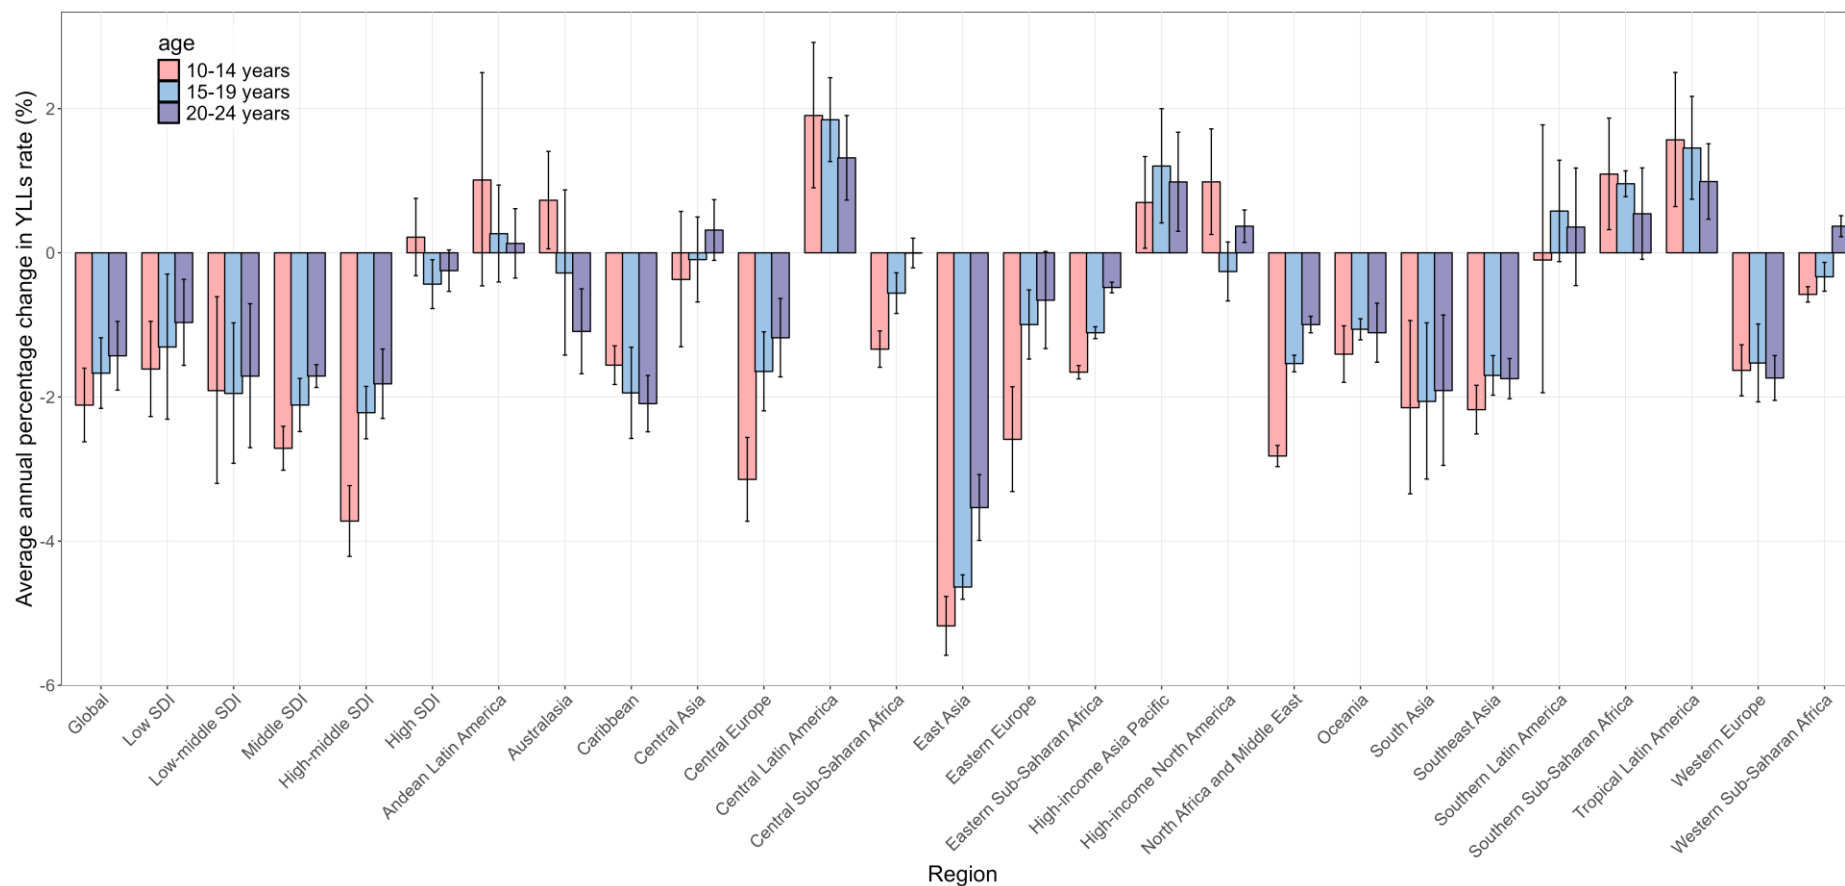

**Figure S11. Joinpoint regression analysis of rate of YLLs from suicide among different age groups in global and different regions, 1990-2021**

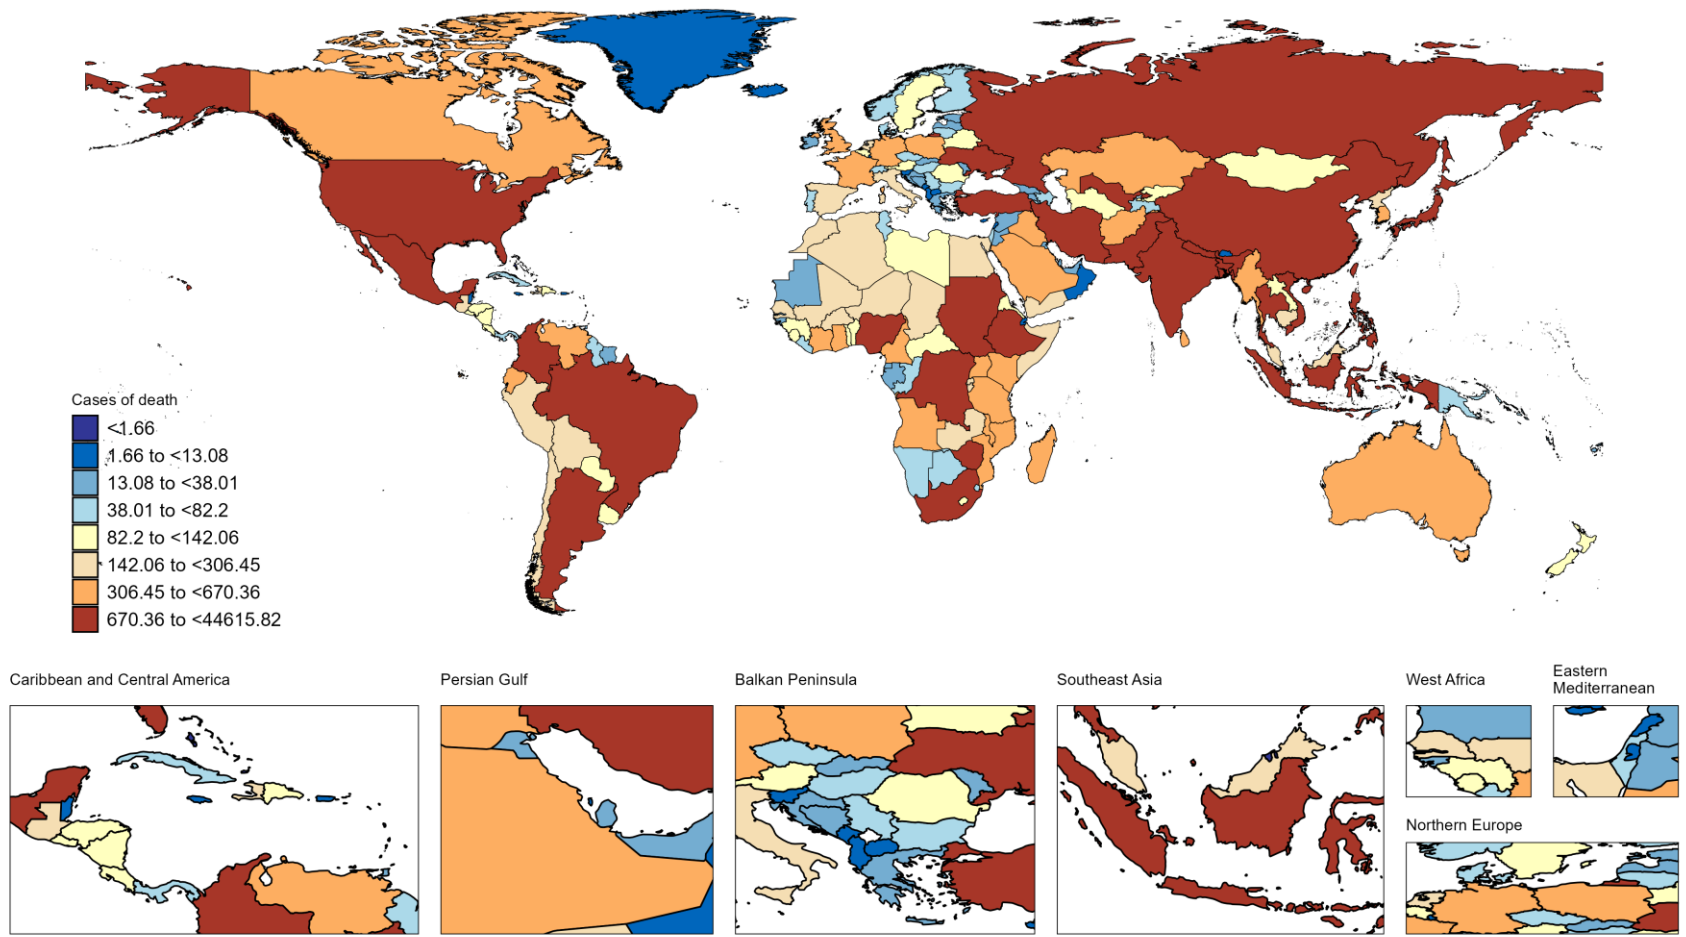

**Figure S12. Global map of death cases from suicide in 2021**

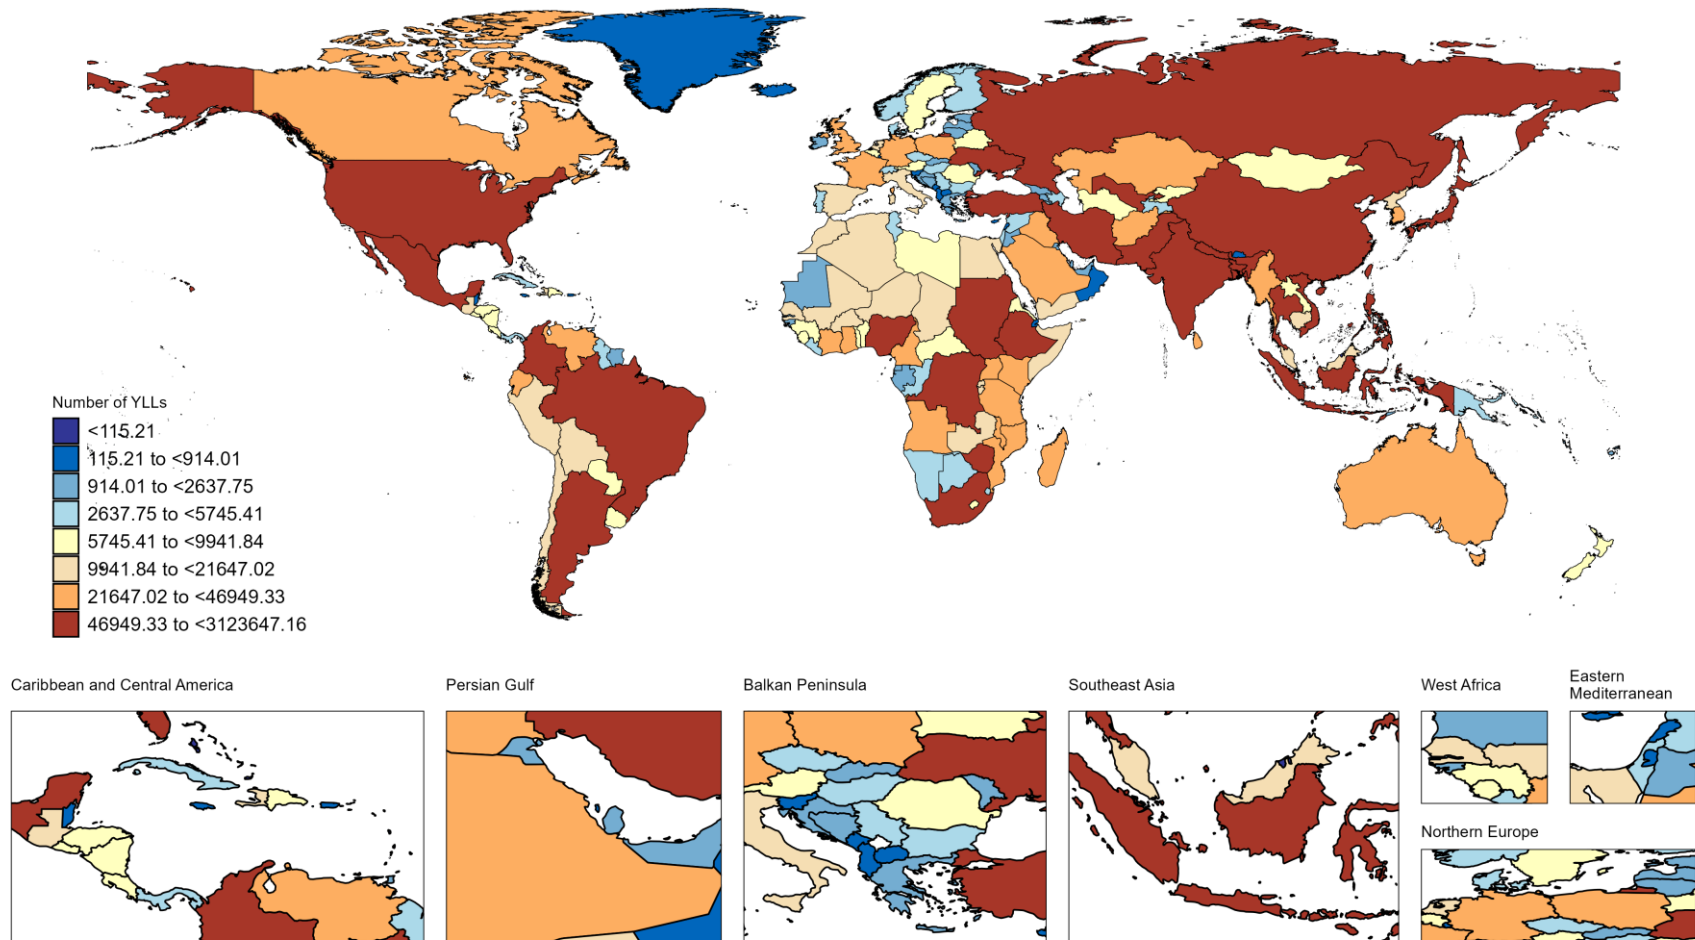

**Figure S13. Global map of YLLs from suicide in 2021**

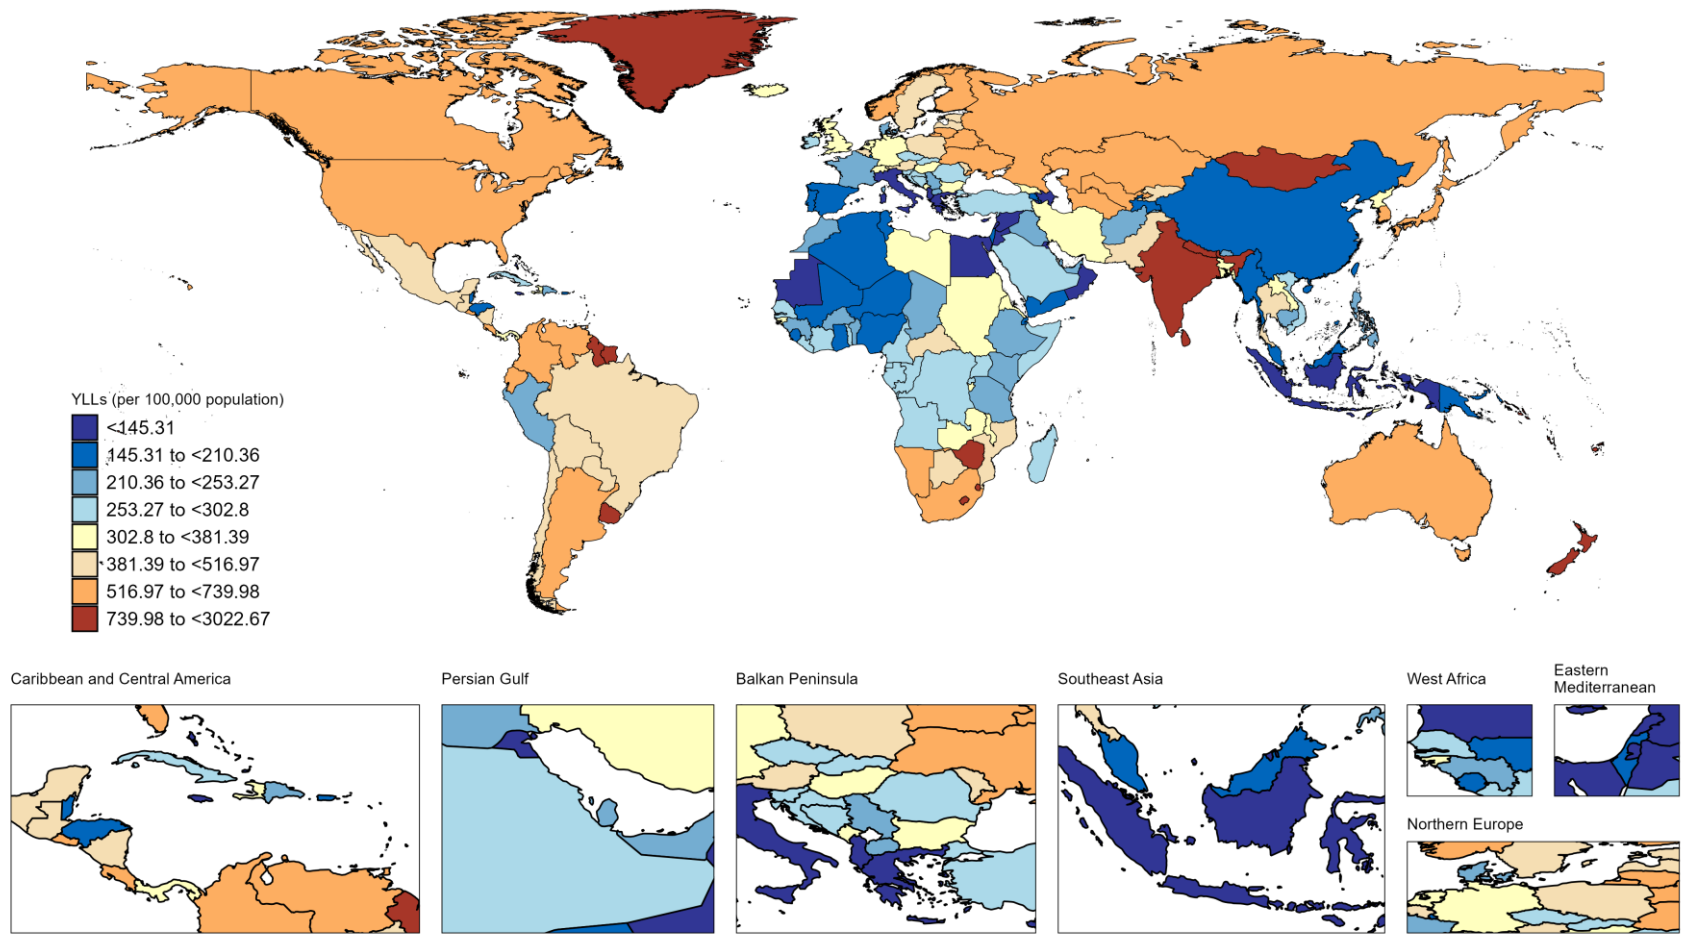

**Figure S14. Global map of rate of YLLs from suicide in 2021**



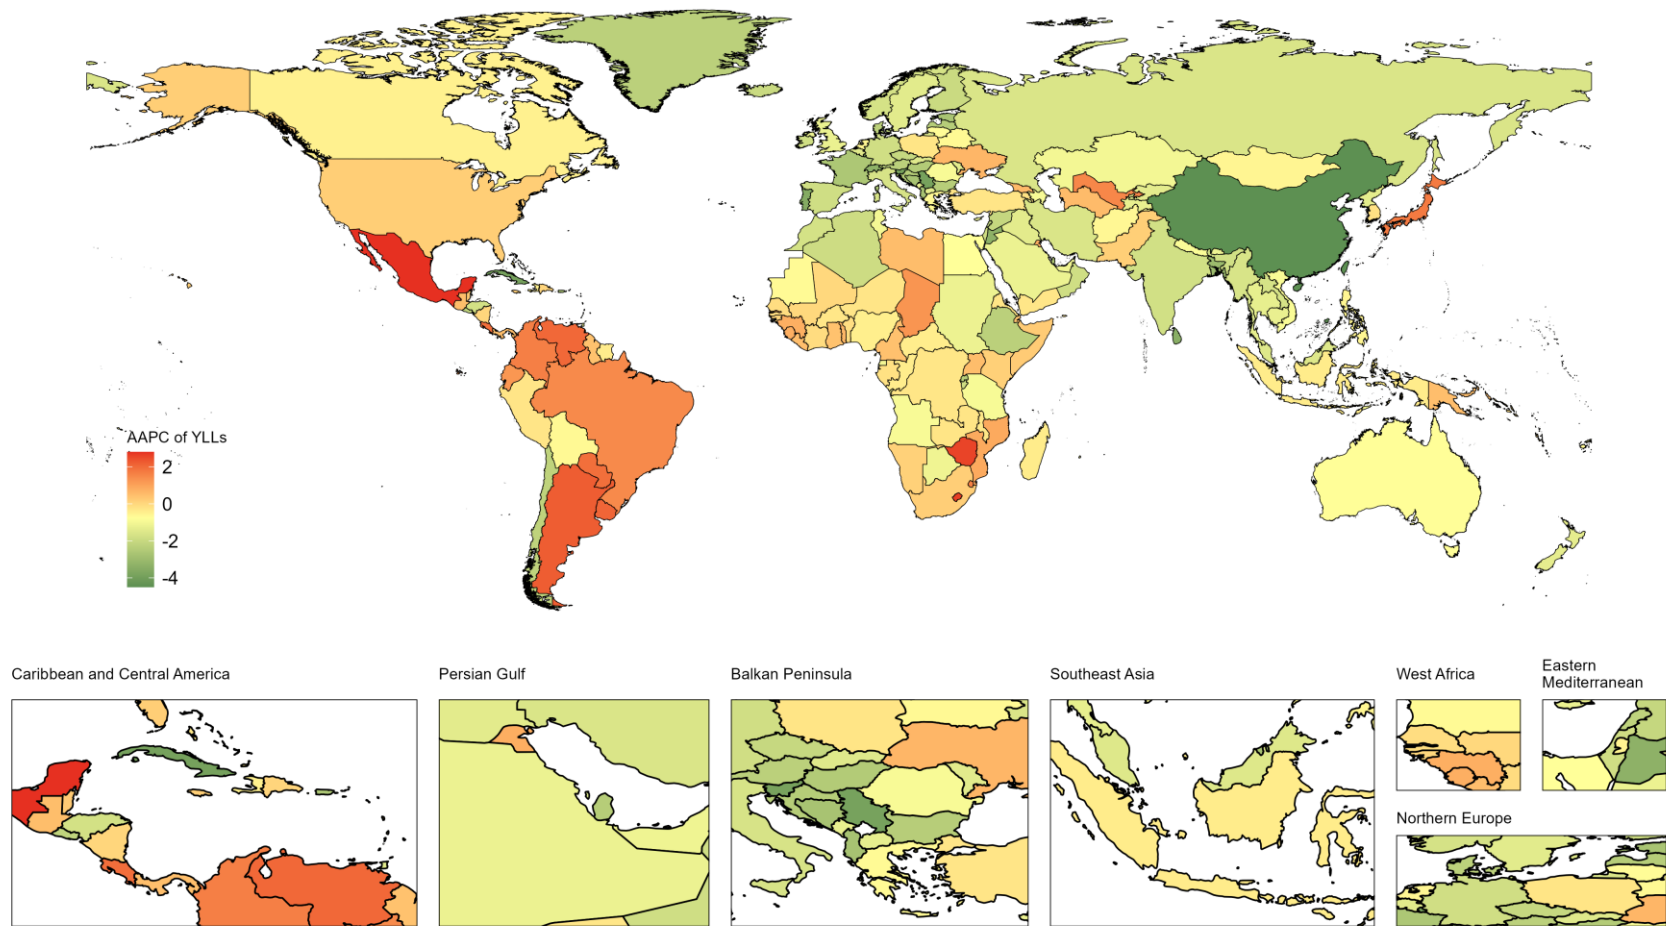

**Figure S15. Global map of AAPC in rate of YLLs from suicide from 1990 to 2021**



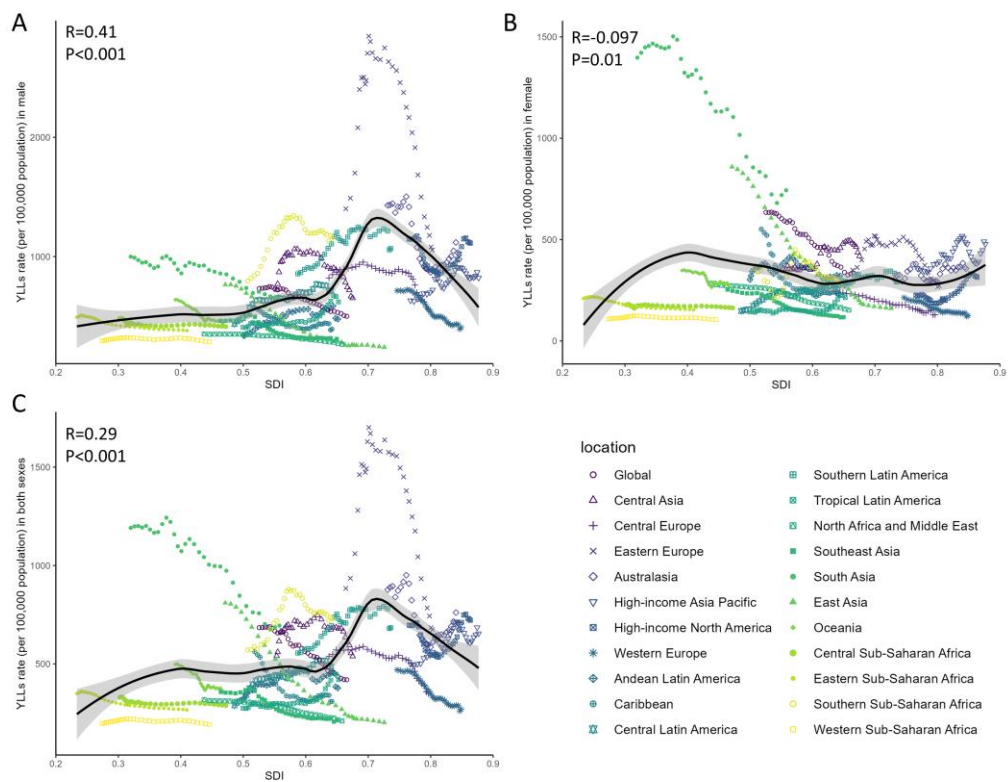

**Figure S16. Trends for rate of YLLs of suicide among 21 regions by SDI for males (A), females (B), and both sexes (C) in 10-24 years population combined from 1990 to 2021**  
SDI: Socio-demographic Index; Black line represents the expected rate of YLLs based on SDIs in all locations.

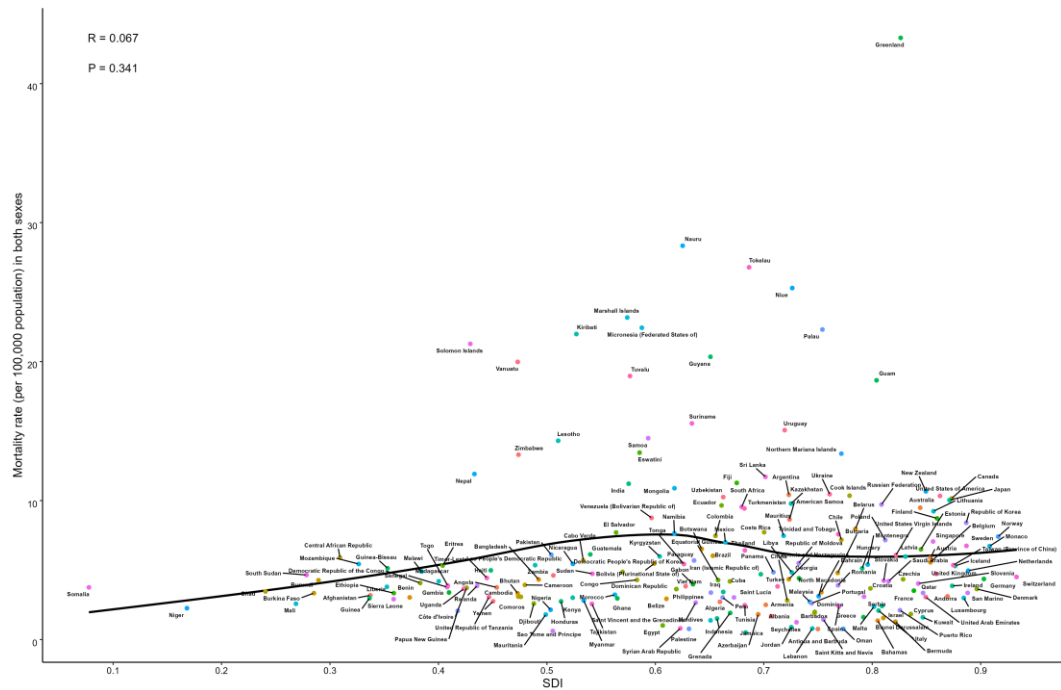

**Figure S17. Trends for mortality of suicide among 204 countries by SDI for both sexes in 10-24 years population in 2021**

SDI: Socio-demographic Index; Black line represents the expected mortality based on SDIs in all countries.

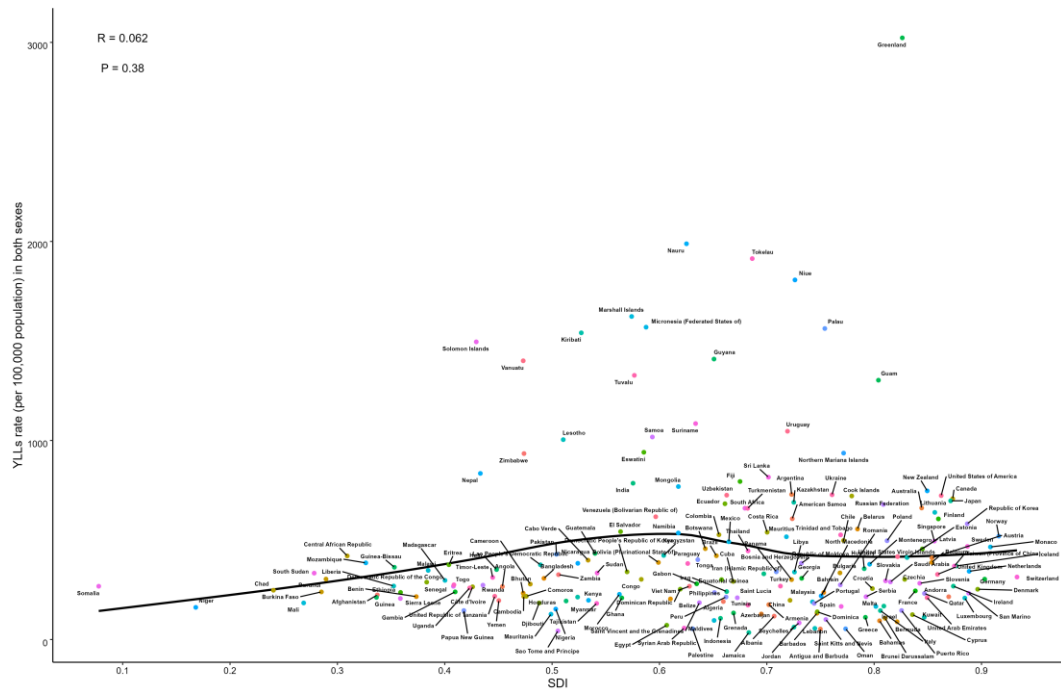

**Figure S18. Trends for rate of YLLs of suicide among 204 countries by SDI for both sexes in 10-24 years population in 2021**

SDI: Socio-demographic Index; Black line represents the expected rate of YLLs based on SDIs in all locations.

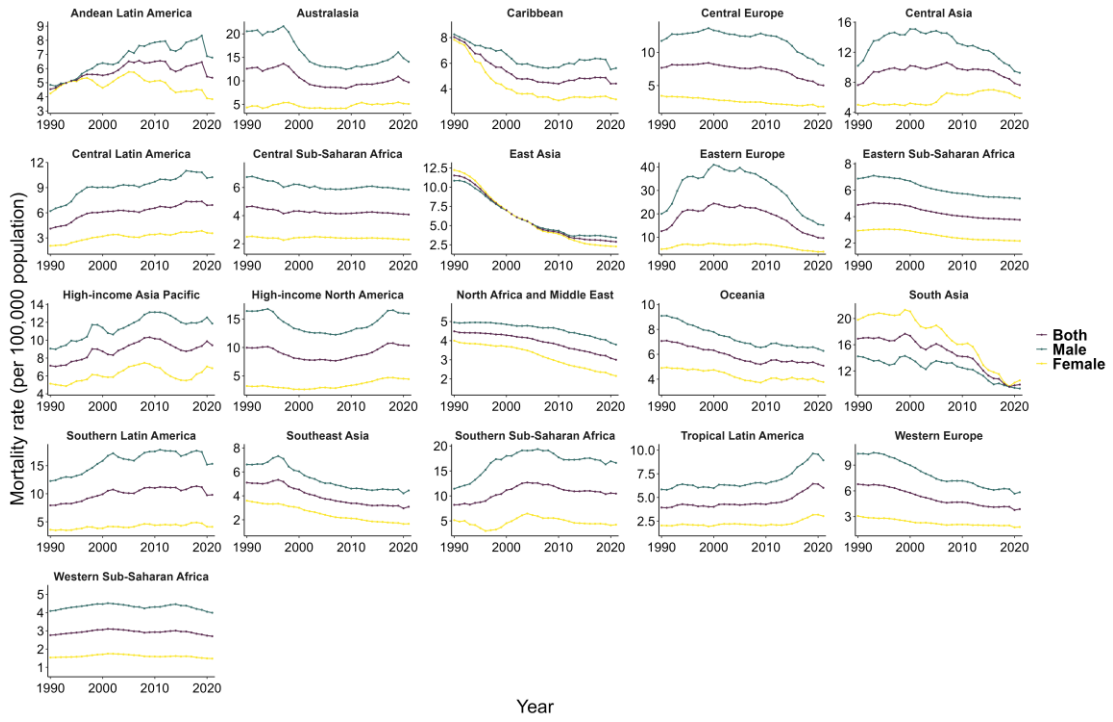

**Figure S19. The trends in suicide mortality in 21 regions, 1990-2021**

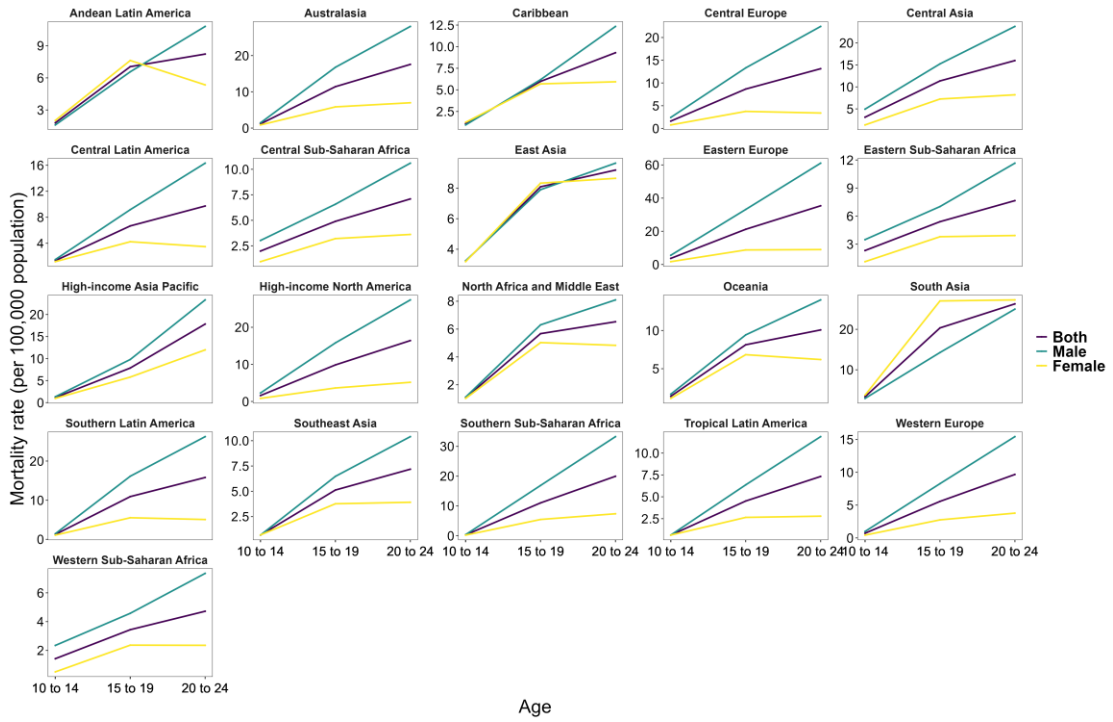

**Figure S20. The age effects of suicide mortality in 21 regions, 1990-2021**

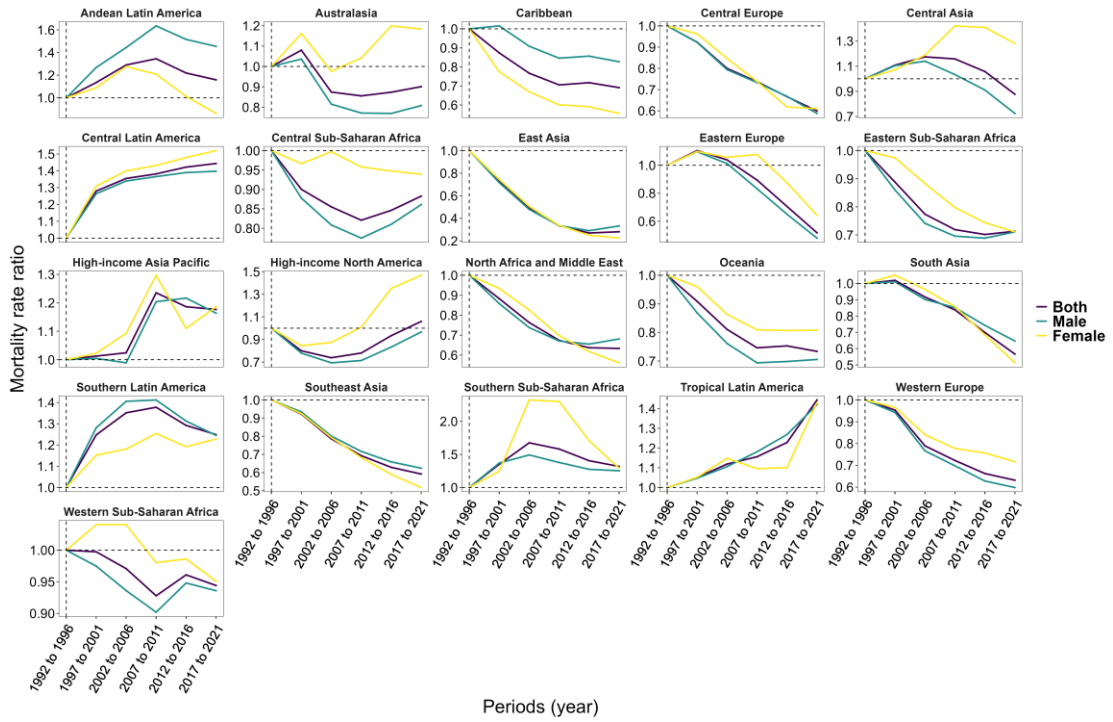

**Figure S21. The period effects of suicide mortality in 21 regions, 1990-2021**

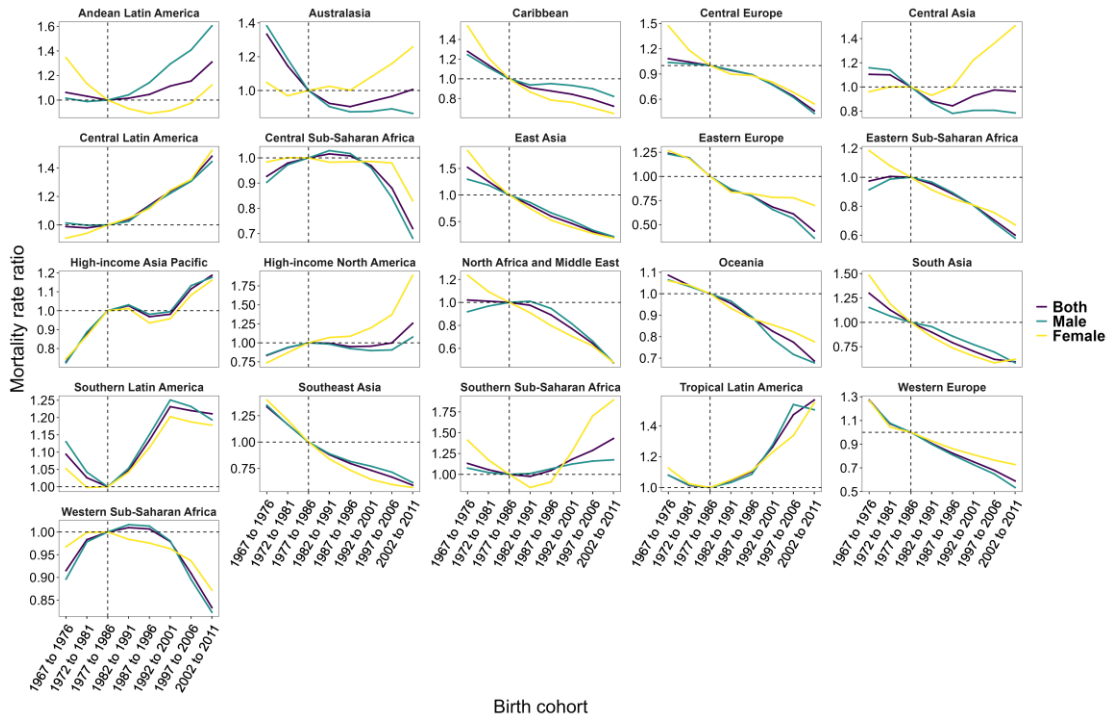

**Figure S22. The cohort effects of suicide mortality in 21 regions, 1990-2021**

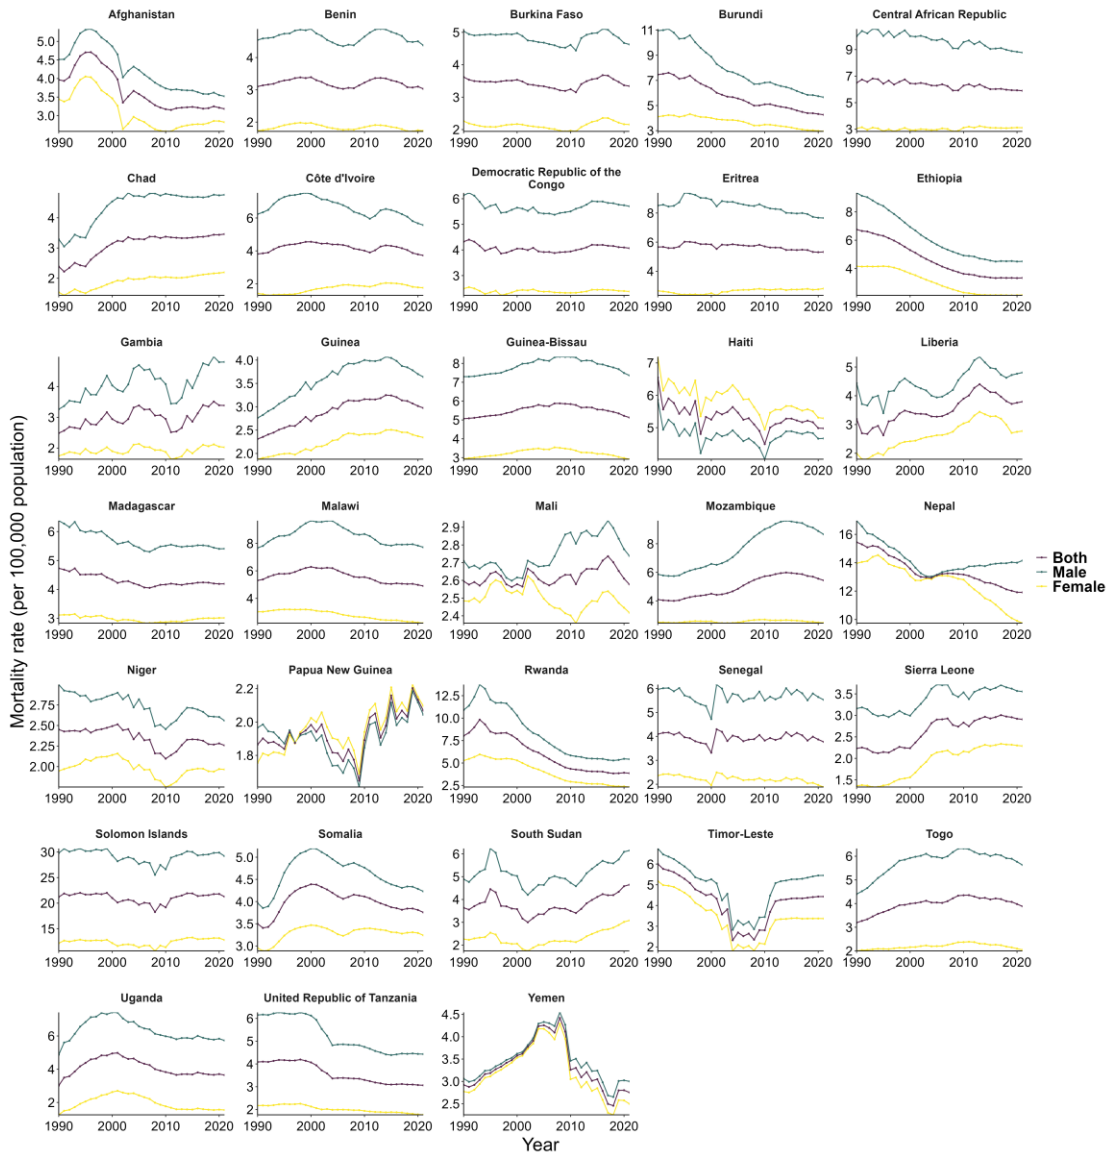

**Figure S23. The trends in suicide mortality in low SDI countries, 1990-2021**



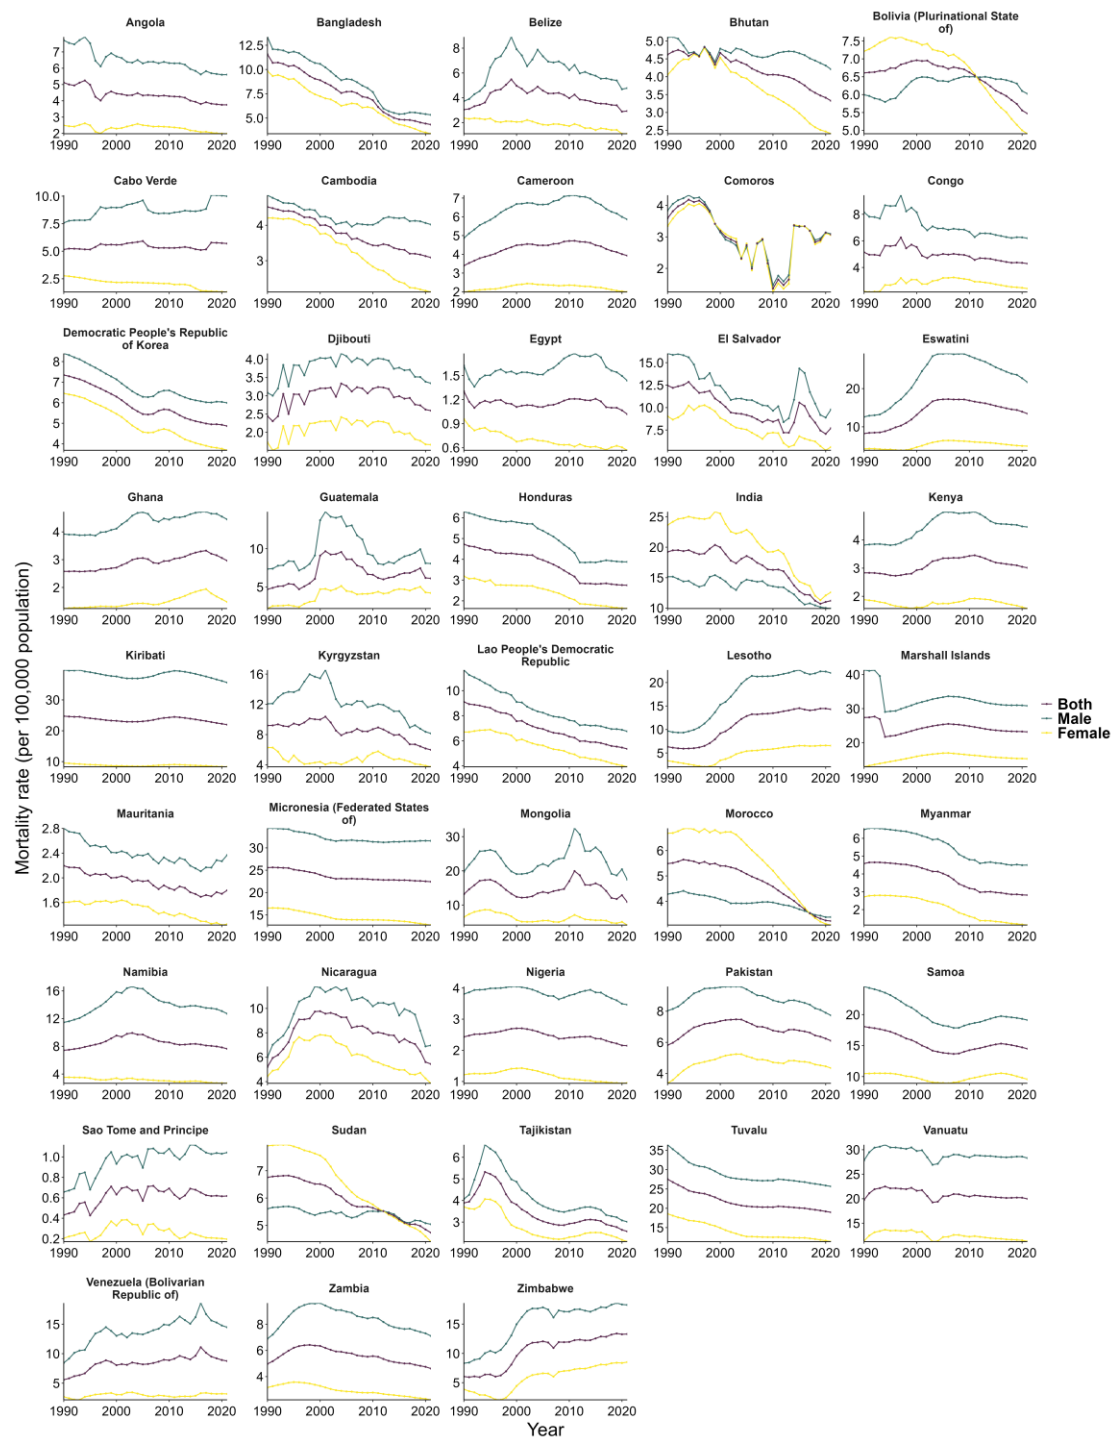

**Figure S24. The trends in suicide mortality in low-middle SDI countries, 1990-2021**

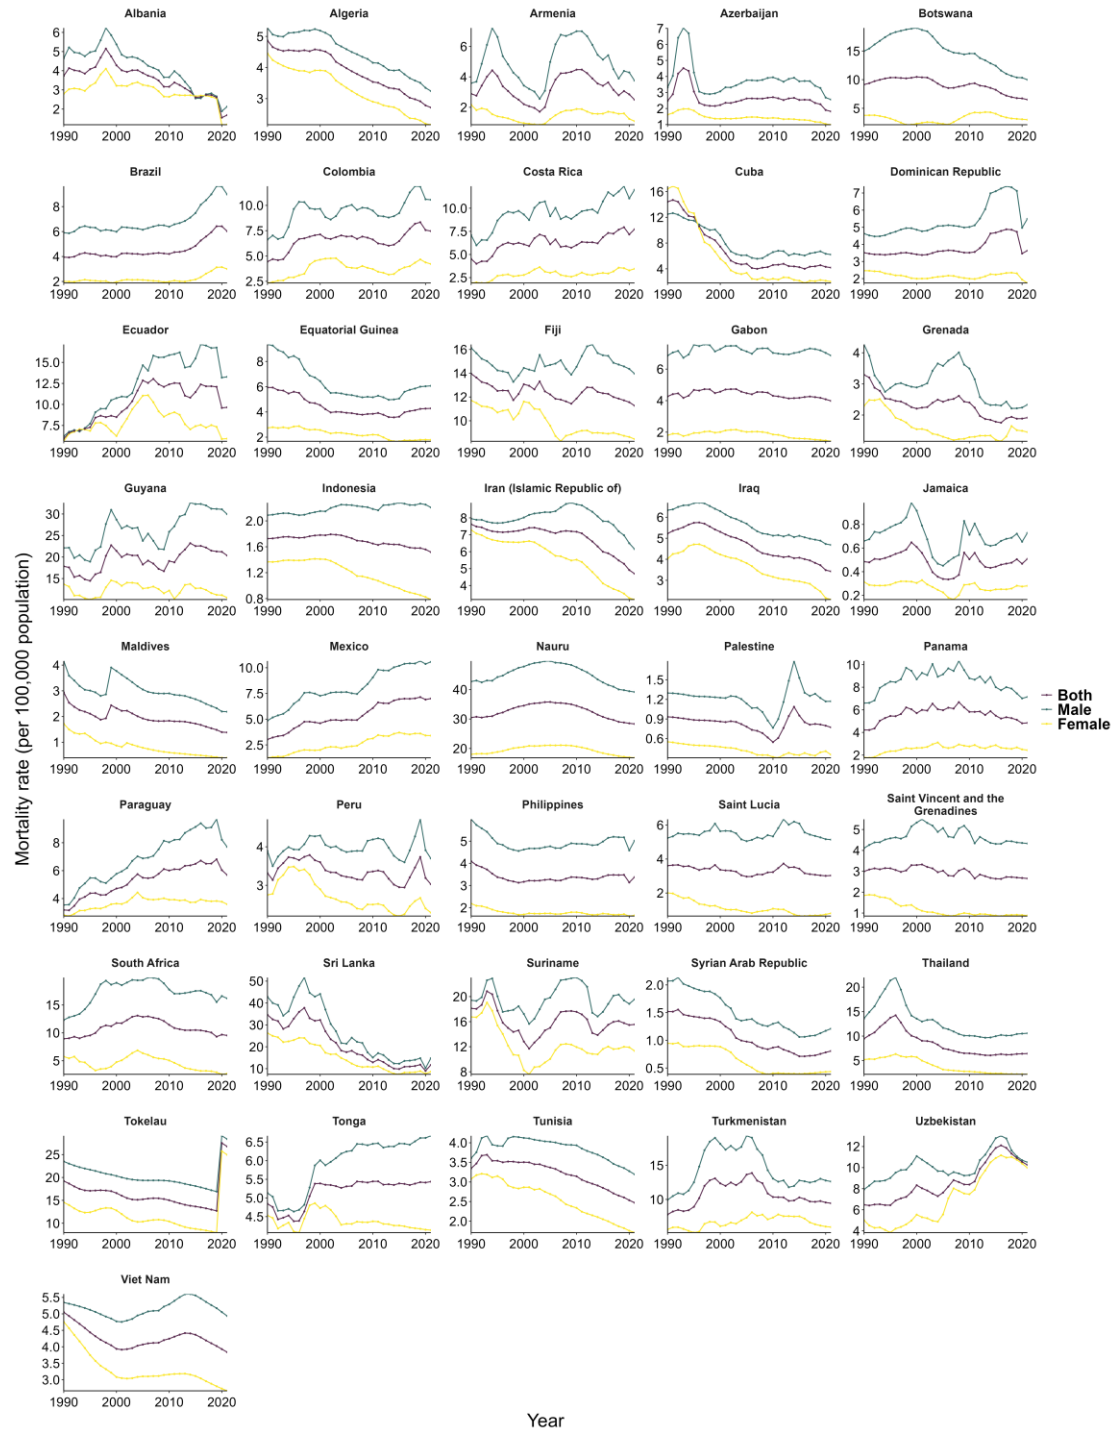

**Figure S25. The trends in suicide mortality in middle SDI countries, 1990-2021**

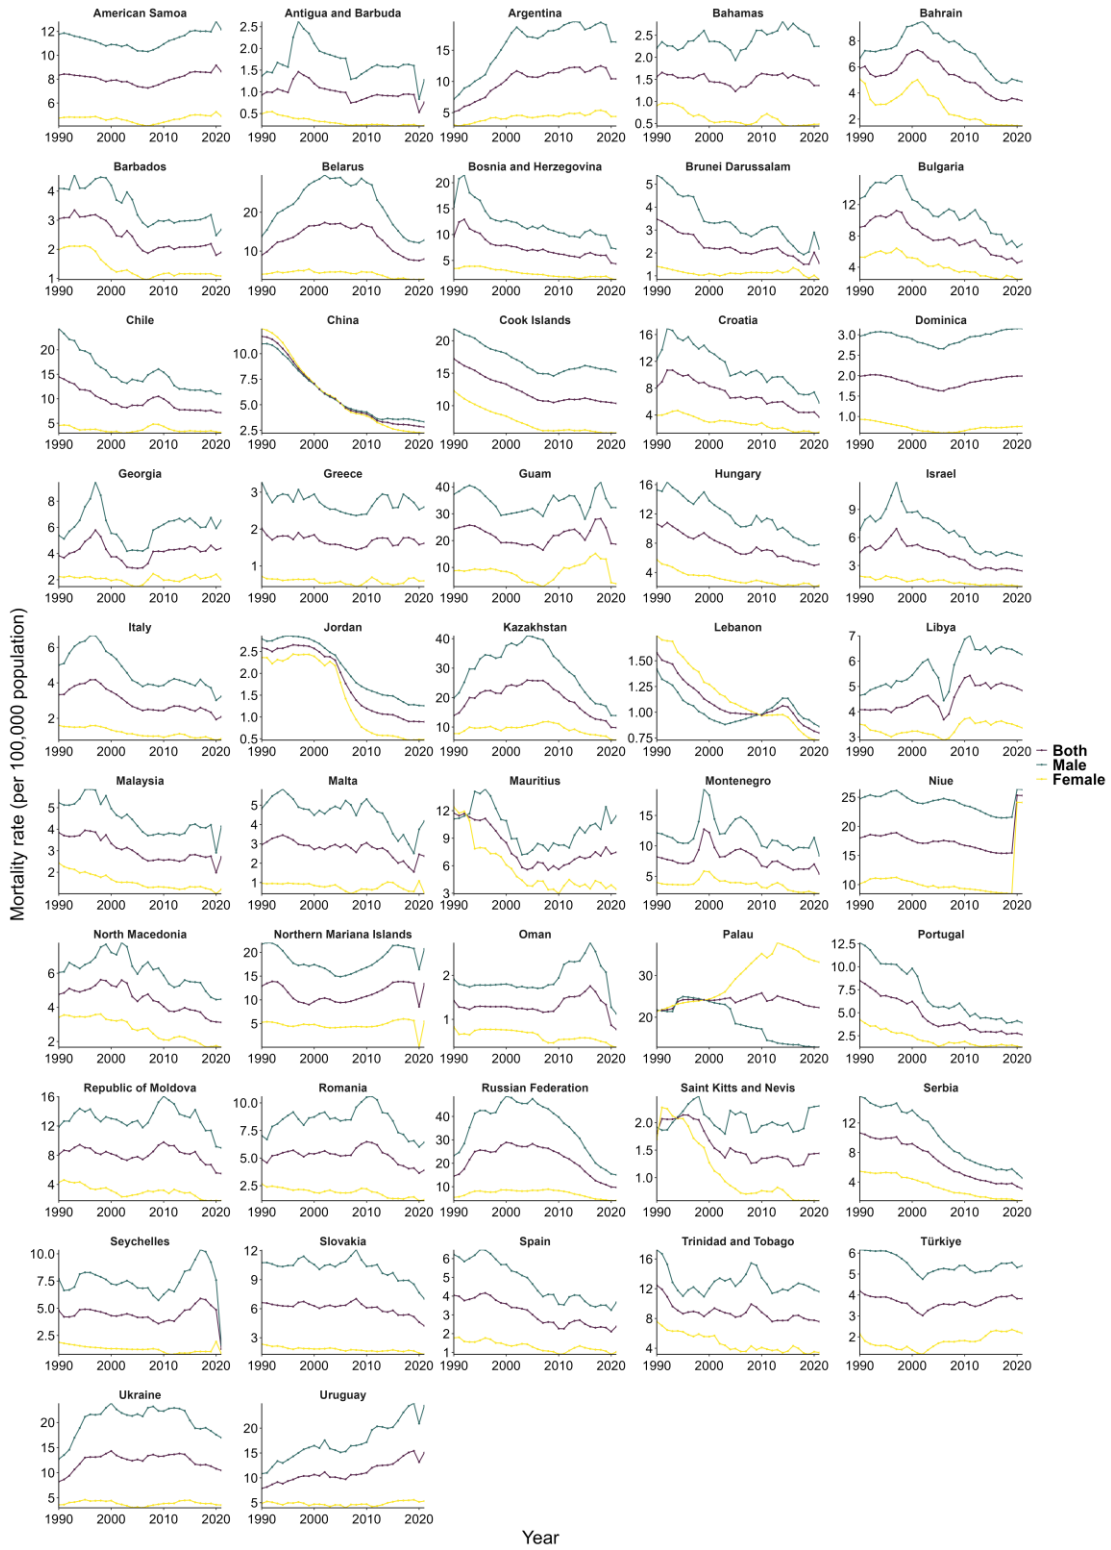

**Figure S26. The trends in suicide mortality in high-middle SDI countries, 1990-2021**

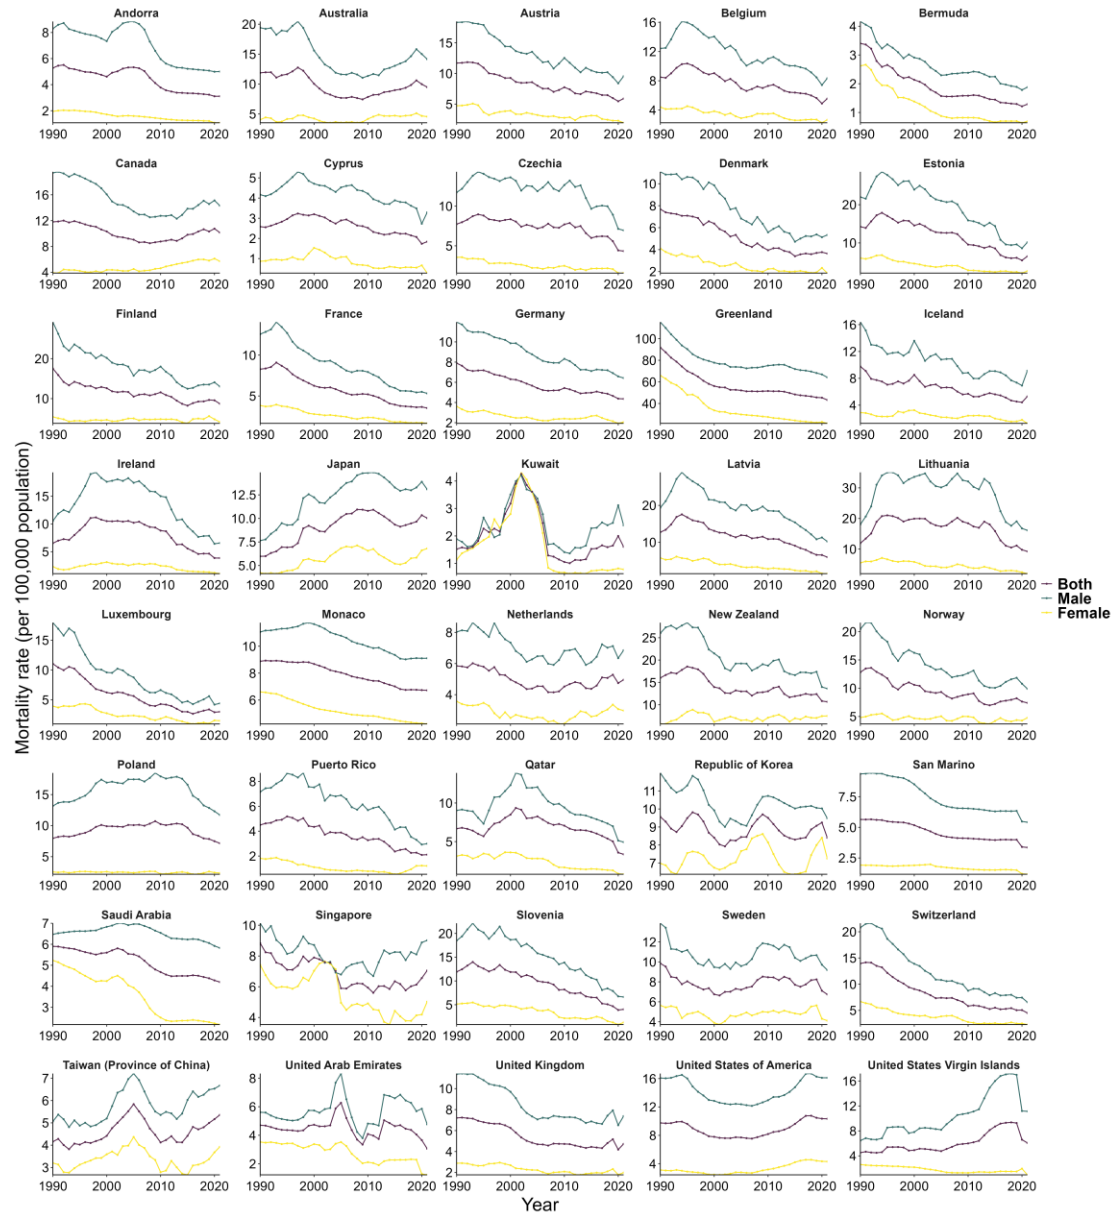

**Figure S27. The trends in suicide mortality in high SDI countries, 1990-2021**

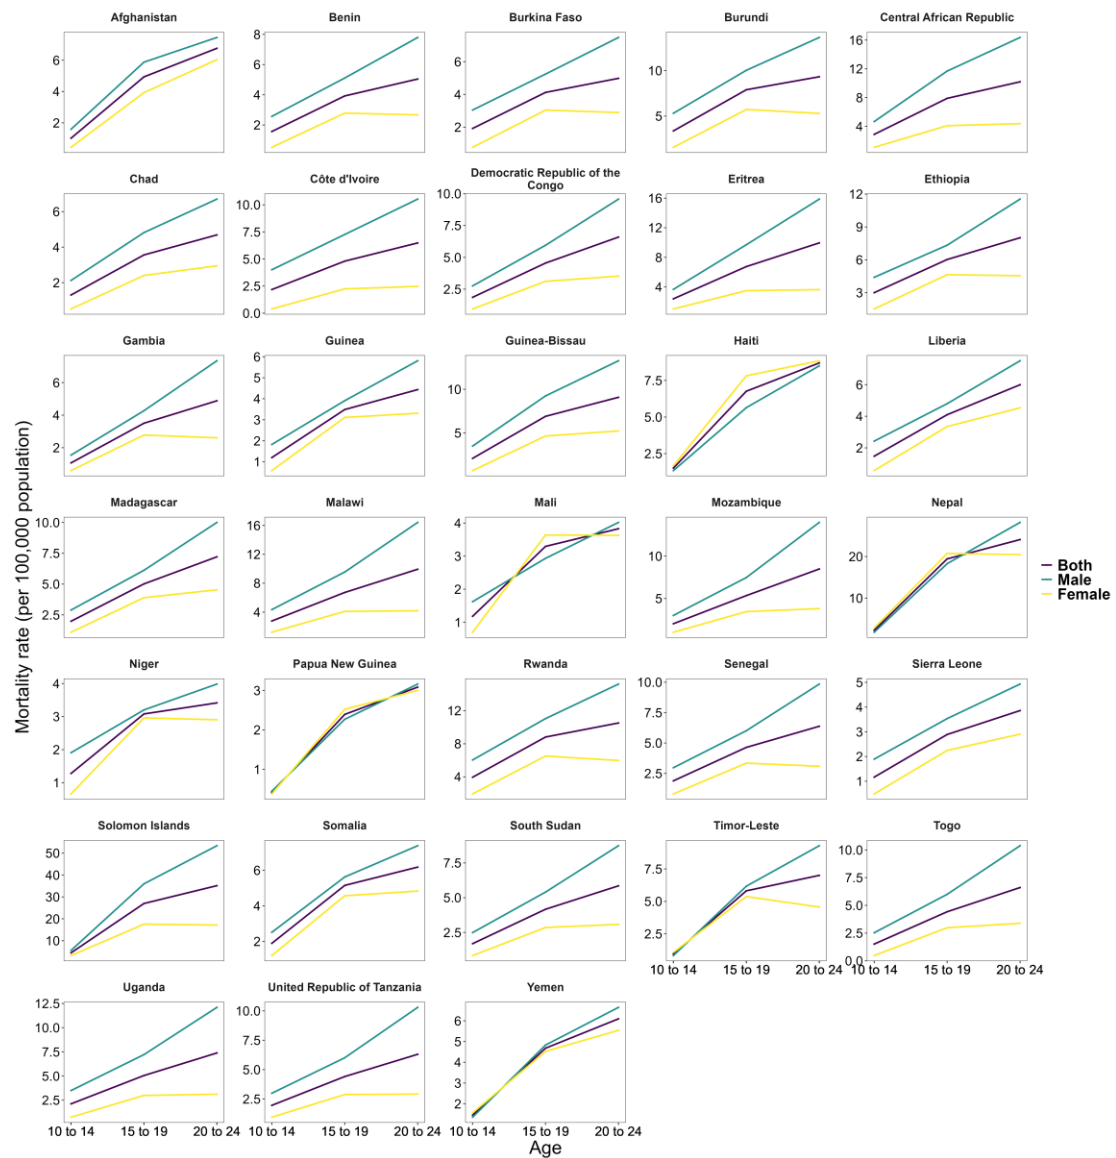

**Figure S28. The age effects of suicide mortality in low SDI countries, 1990-2021**

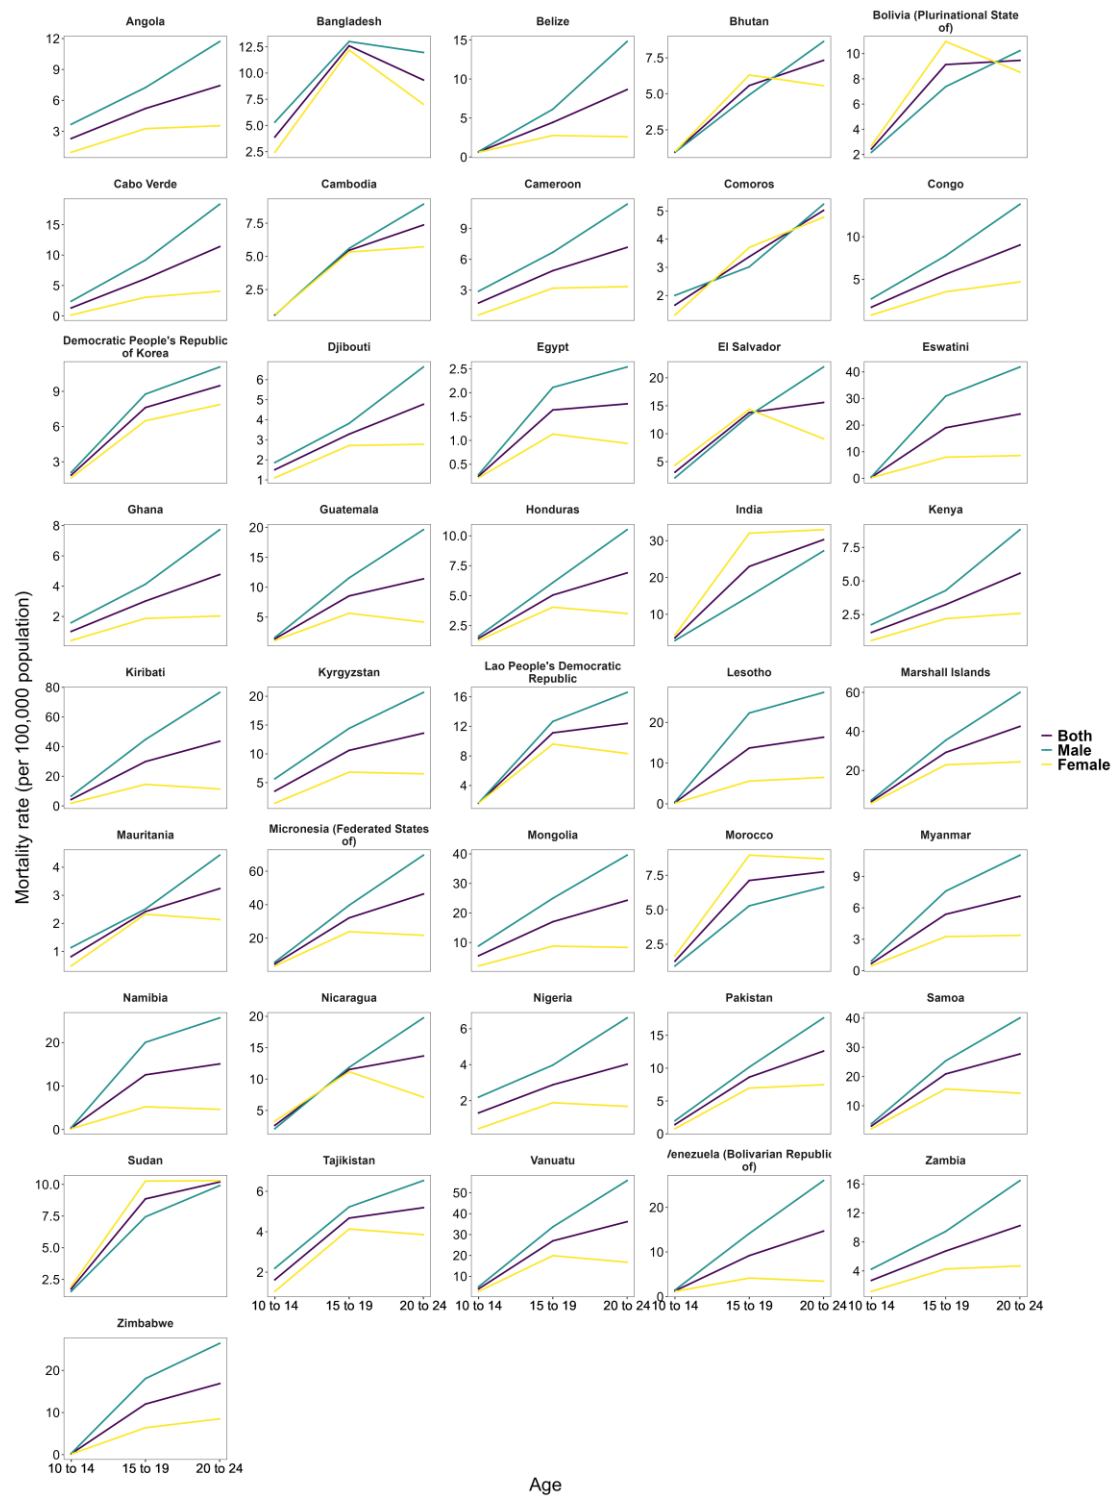

**Figure S29. The age effects of suicide mortality in low-middle SDI countries, 1990-2021**

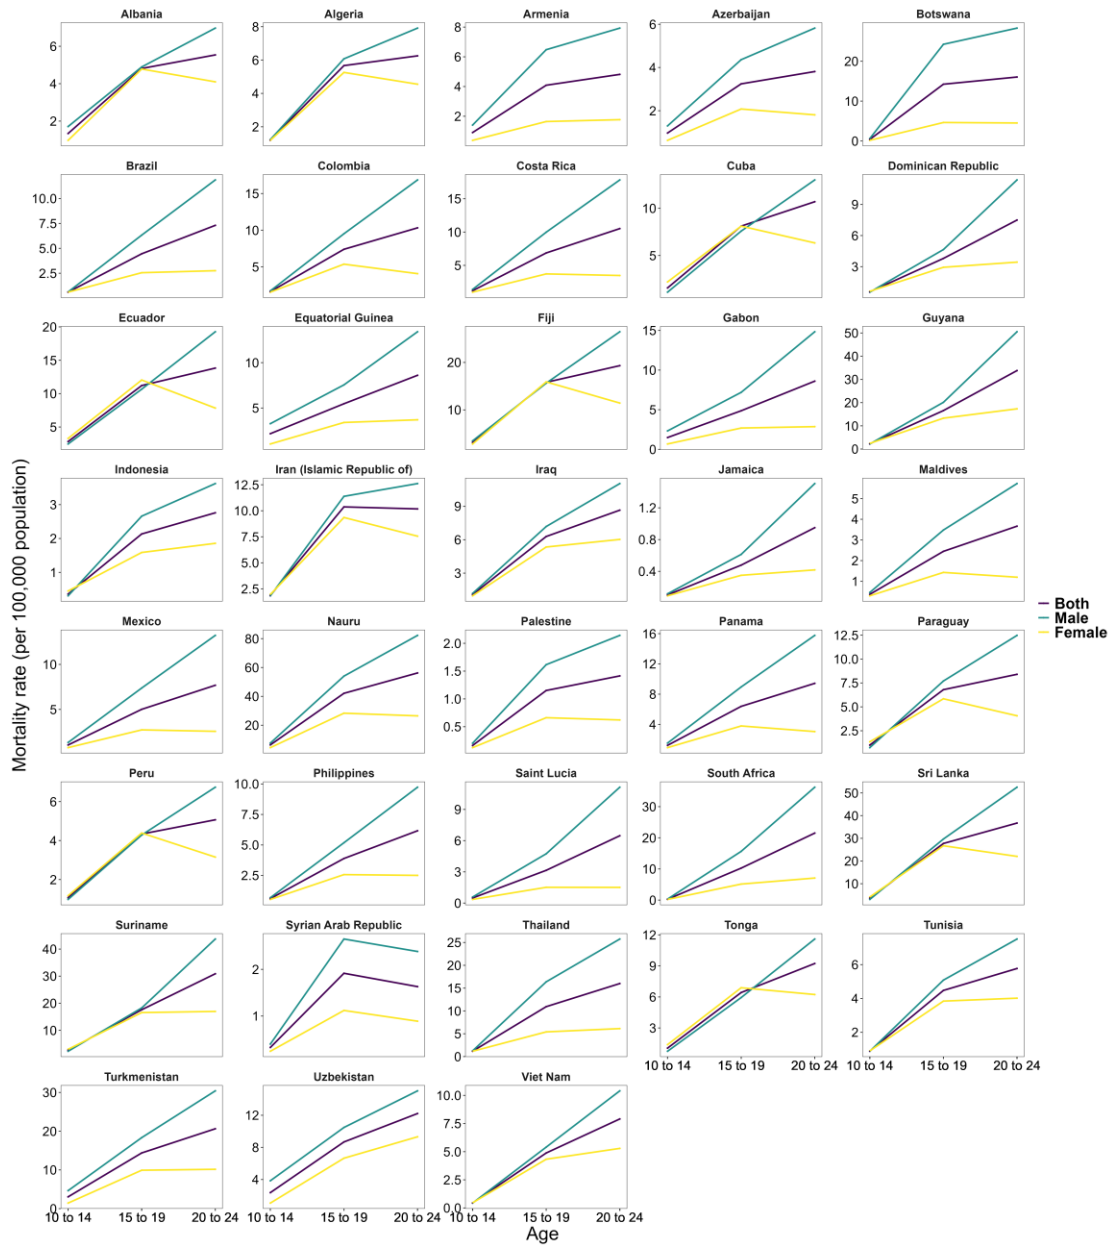

**Figure S30. The age effects of suicide mortality in middle SDI countries, 1990-2021**



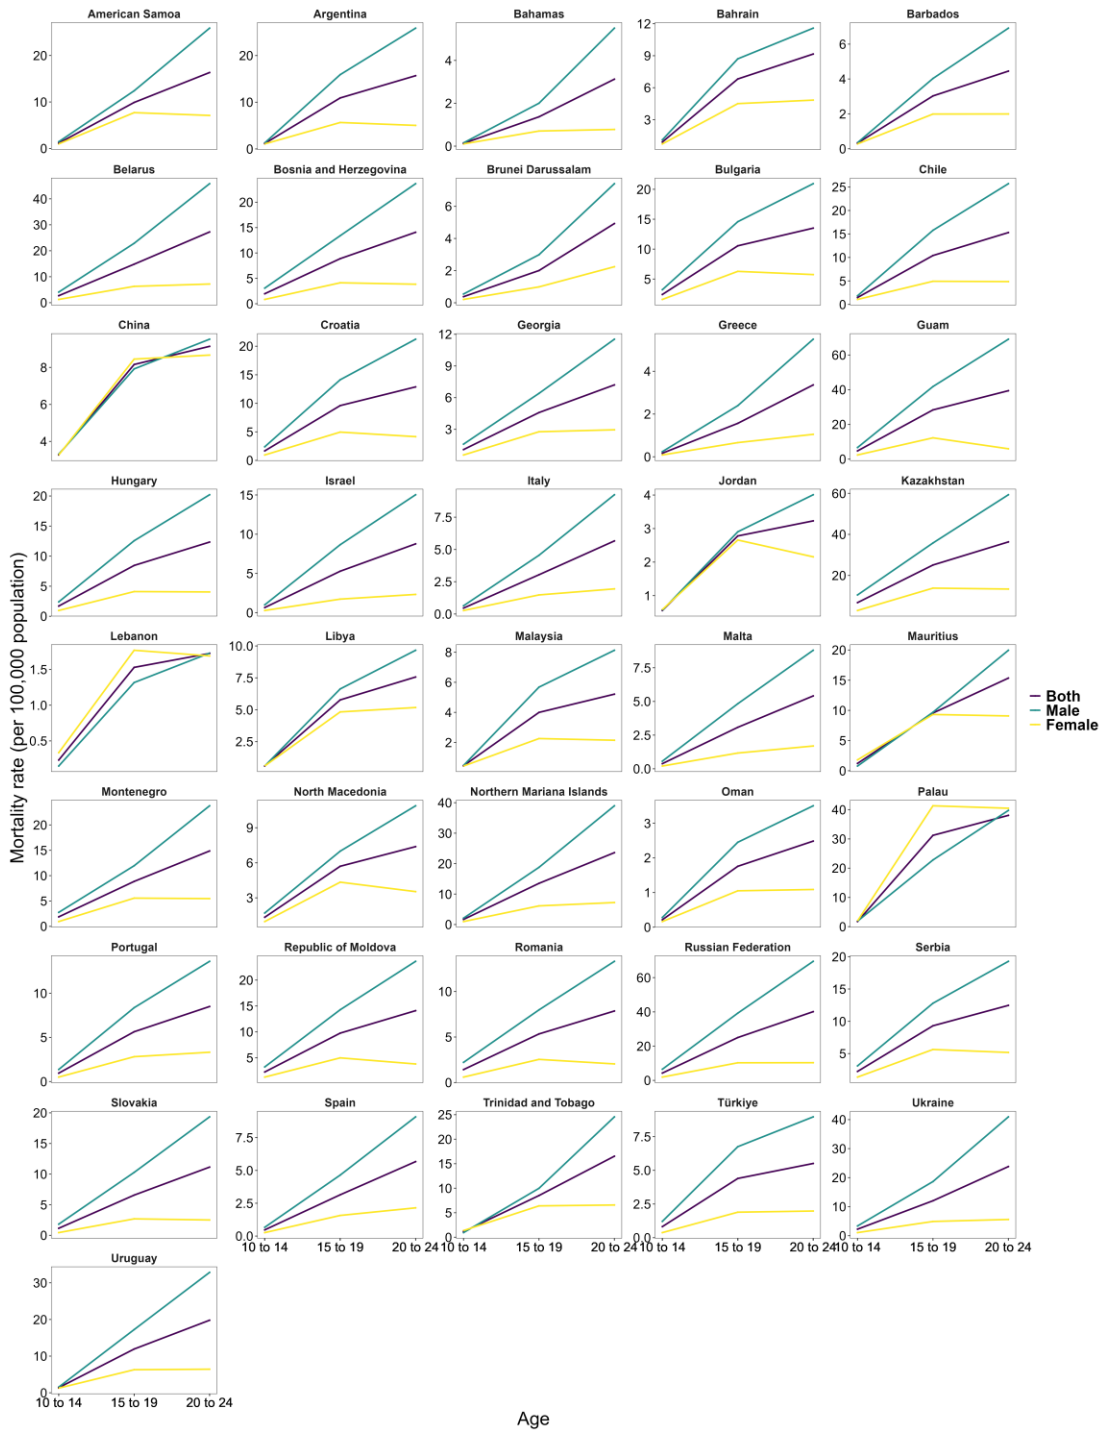

**Figure S31. The age effects of suicide mortality in high-middle SDI countries, 1990-2021**



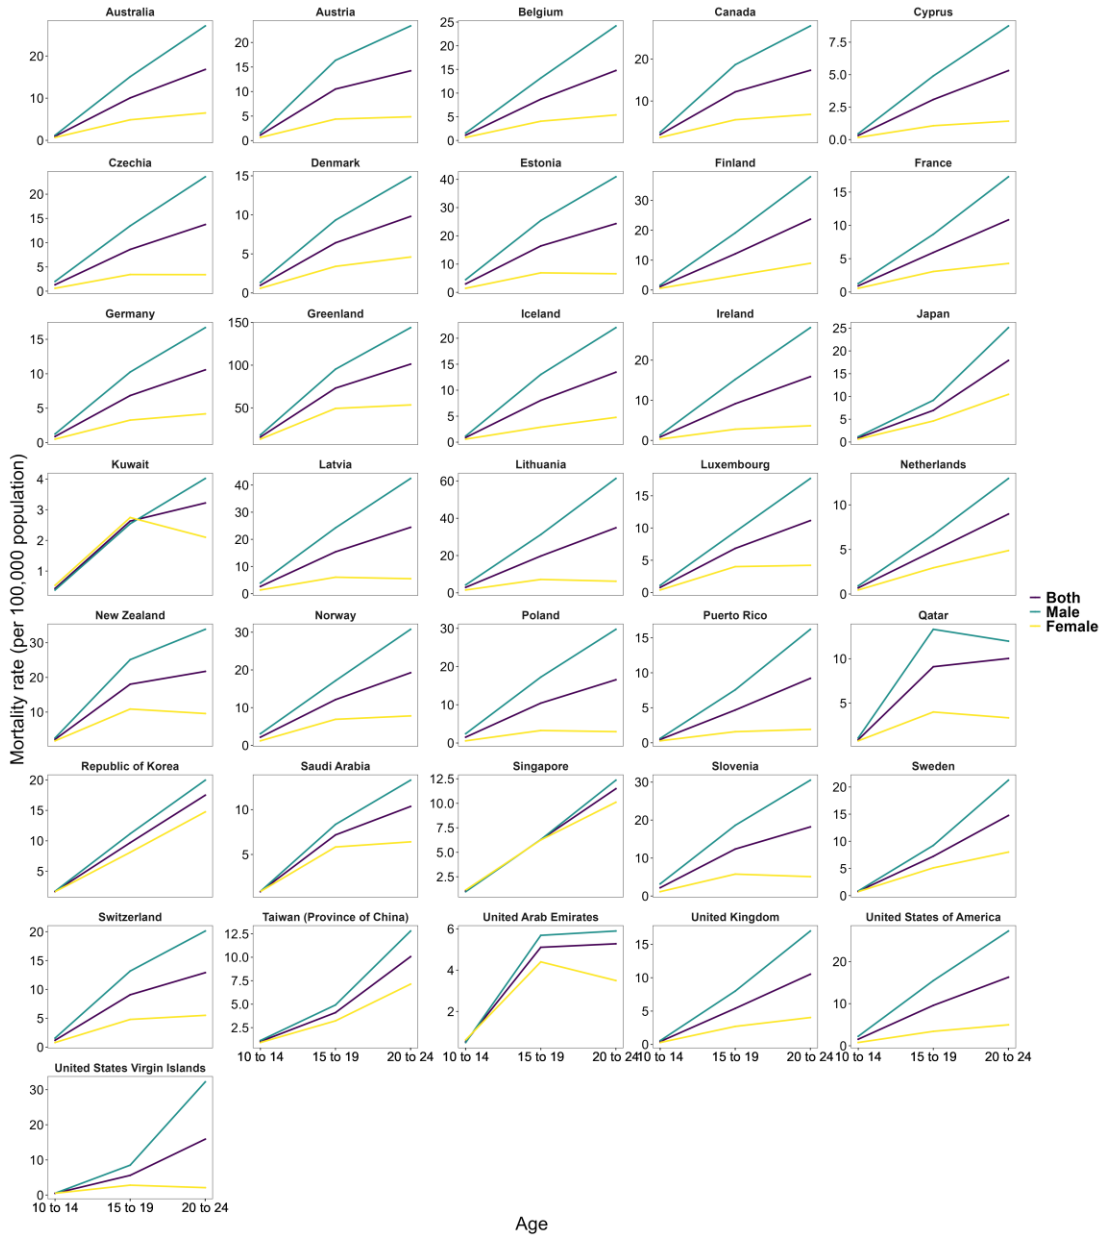

**Figure S32. The age effects of suicide mortality in high SDI countries, 1990-2021**

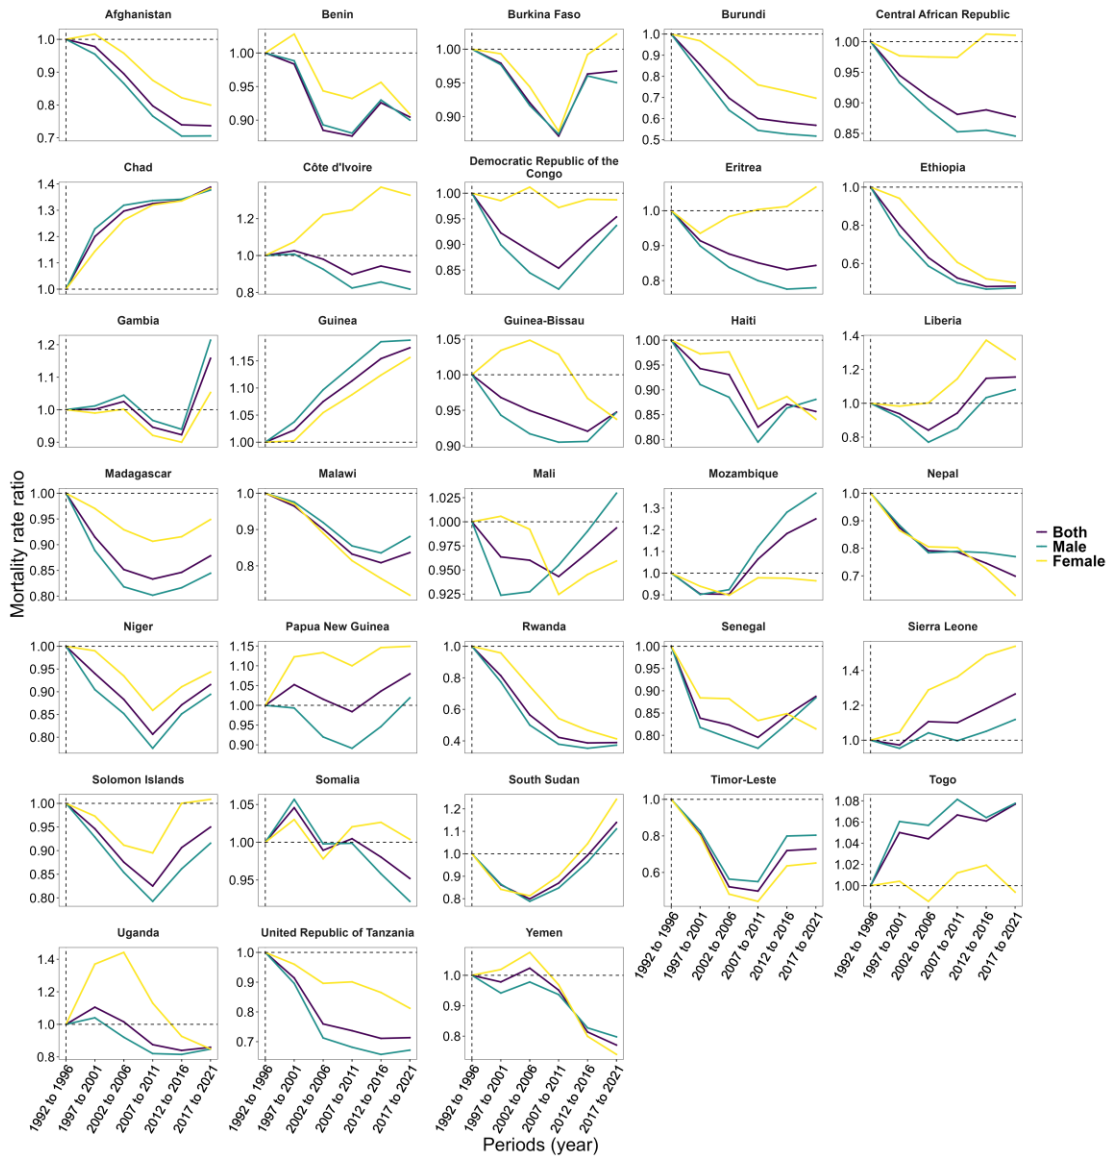

**Figure S33. The period effects of suicide mortality in low SDI countries, 1990-2021**

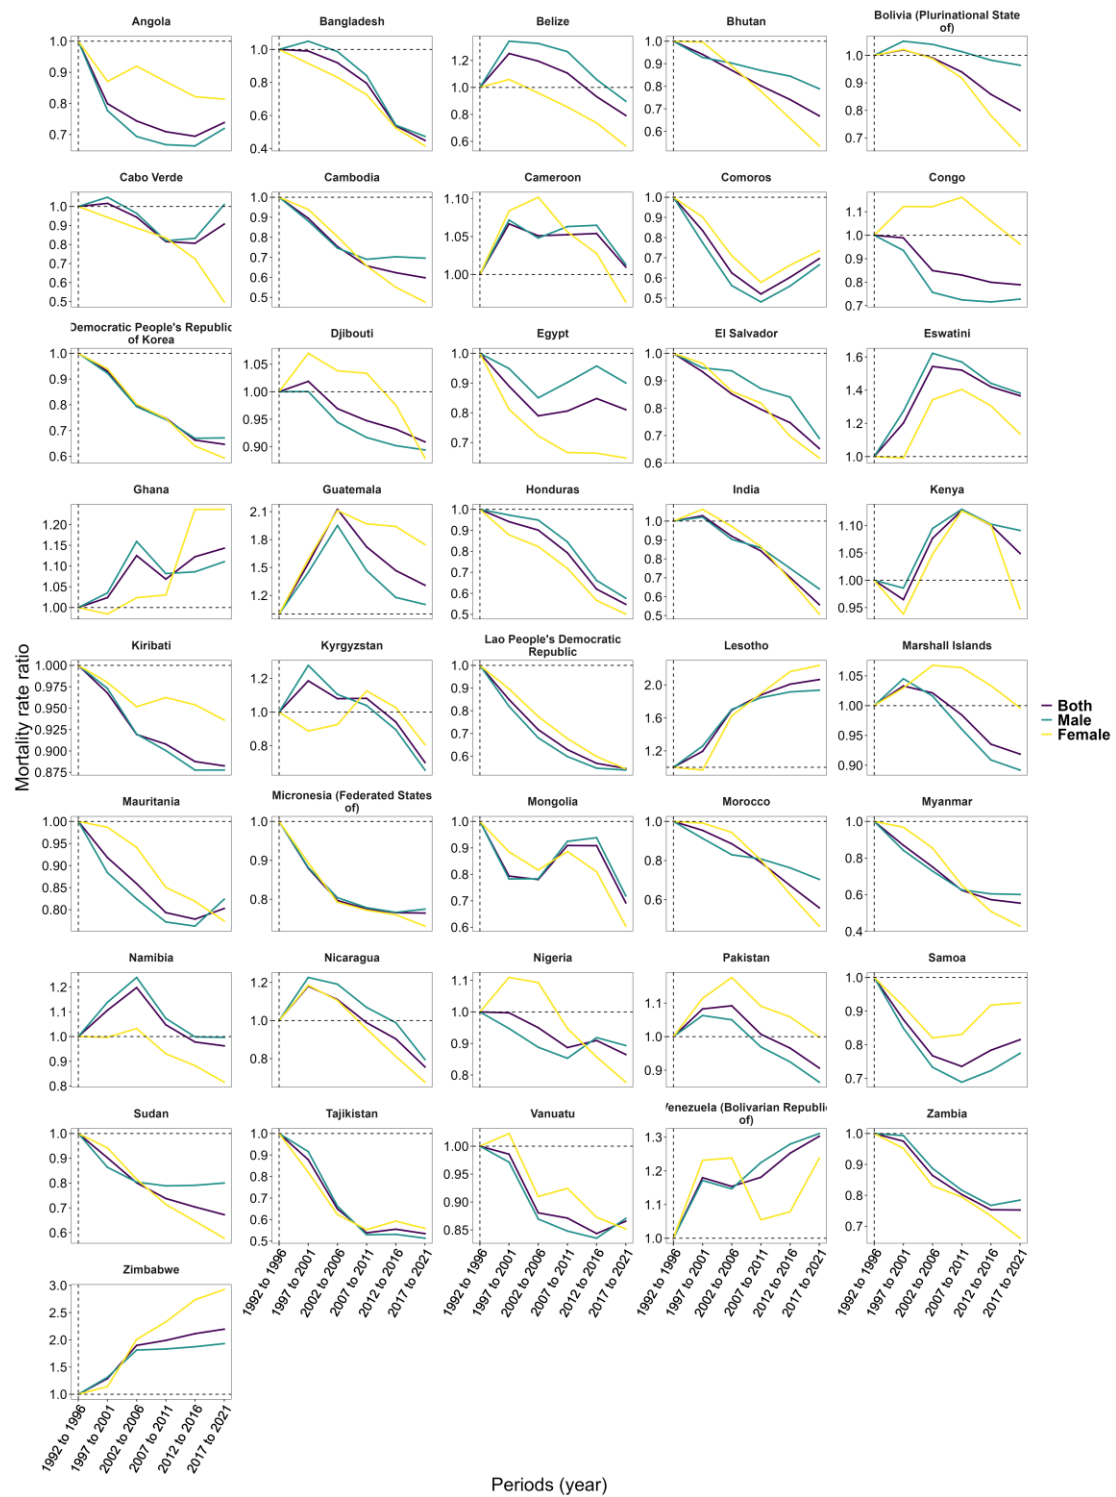

Figure S34. The period effects of suicide mortality in low-middle SDI countries, 1990-2021

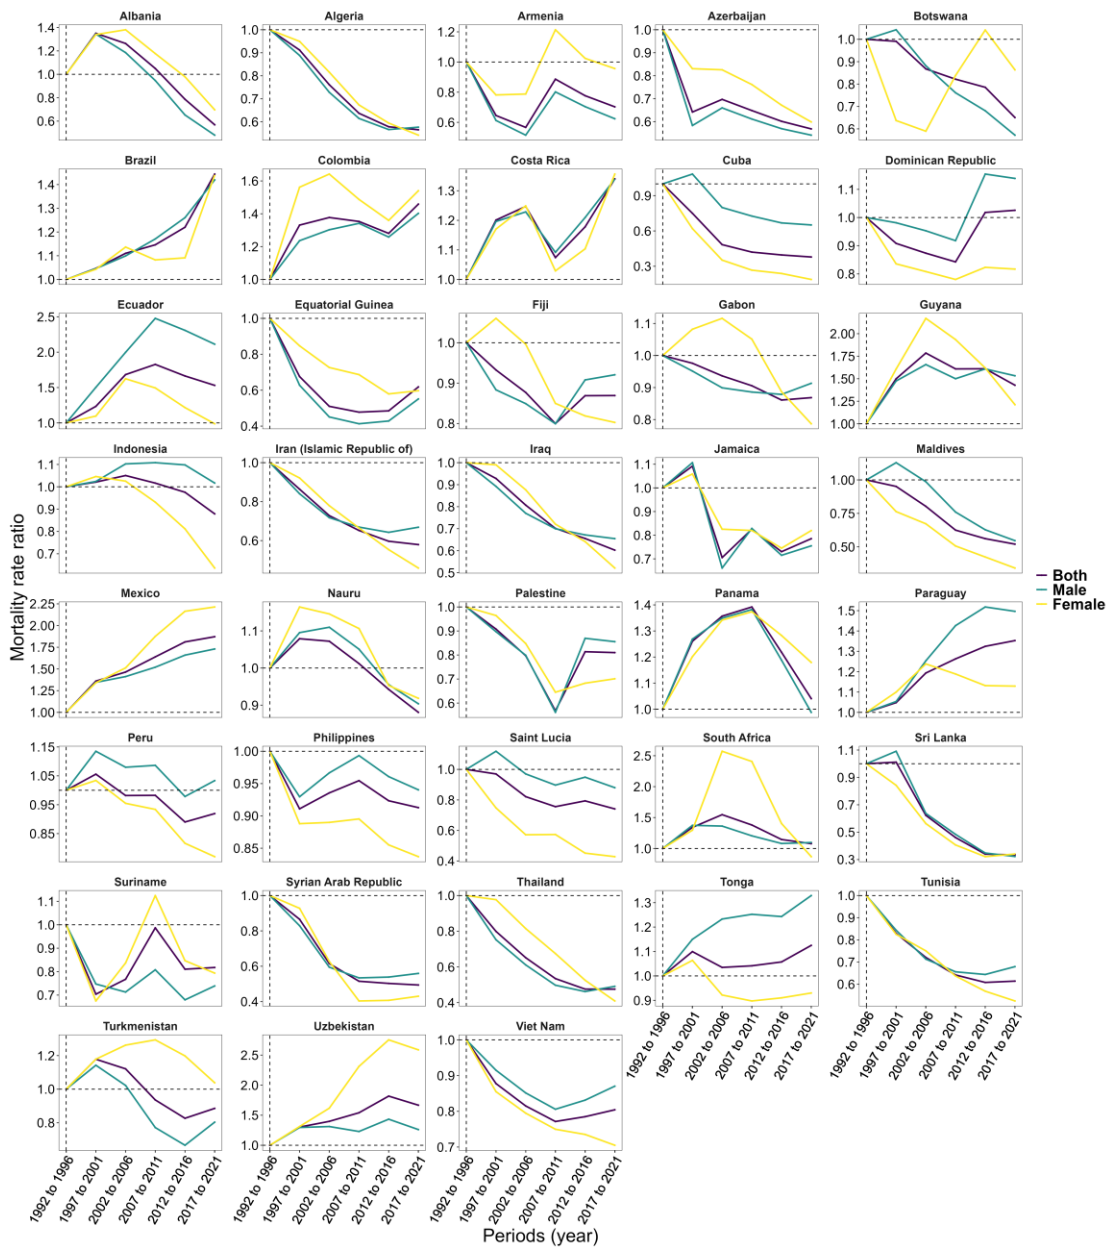

**Figure S35. The period effects of suicide mortality in middle SDI countries, 1990-2021**

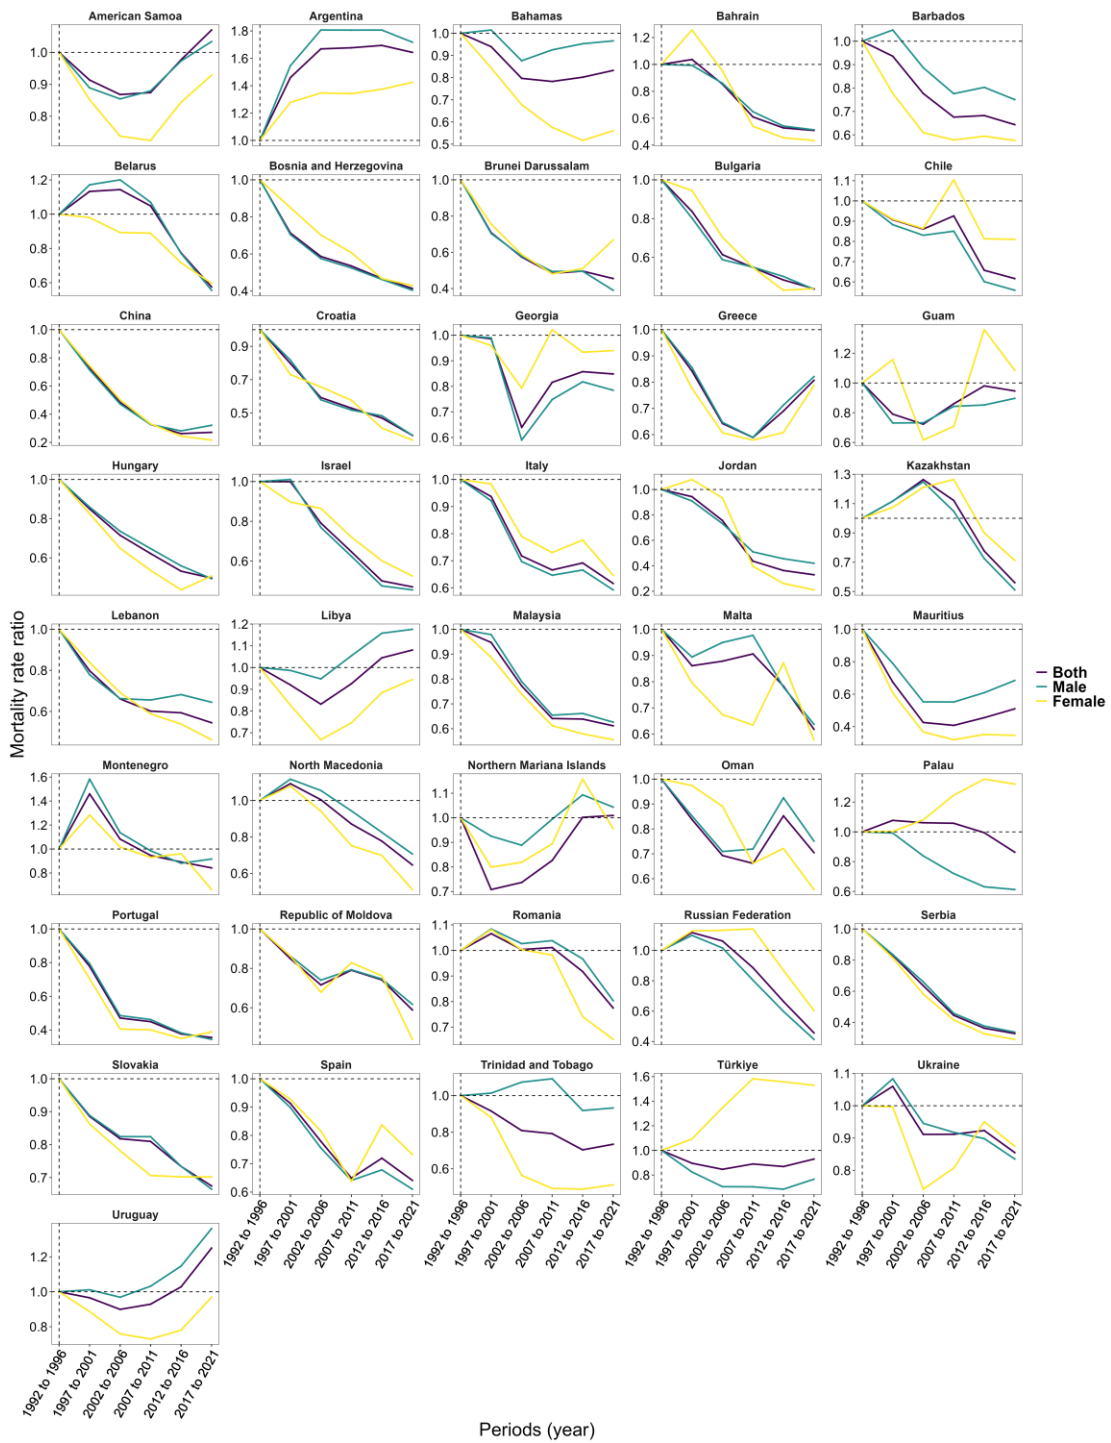

**Figure S36. The period effects of suicide mortality in high-middle SDI countries, 1990-2021**

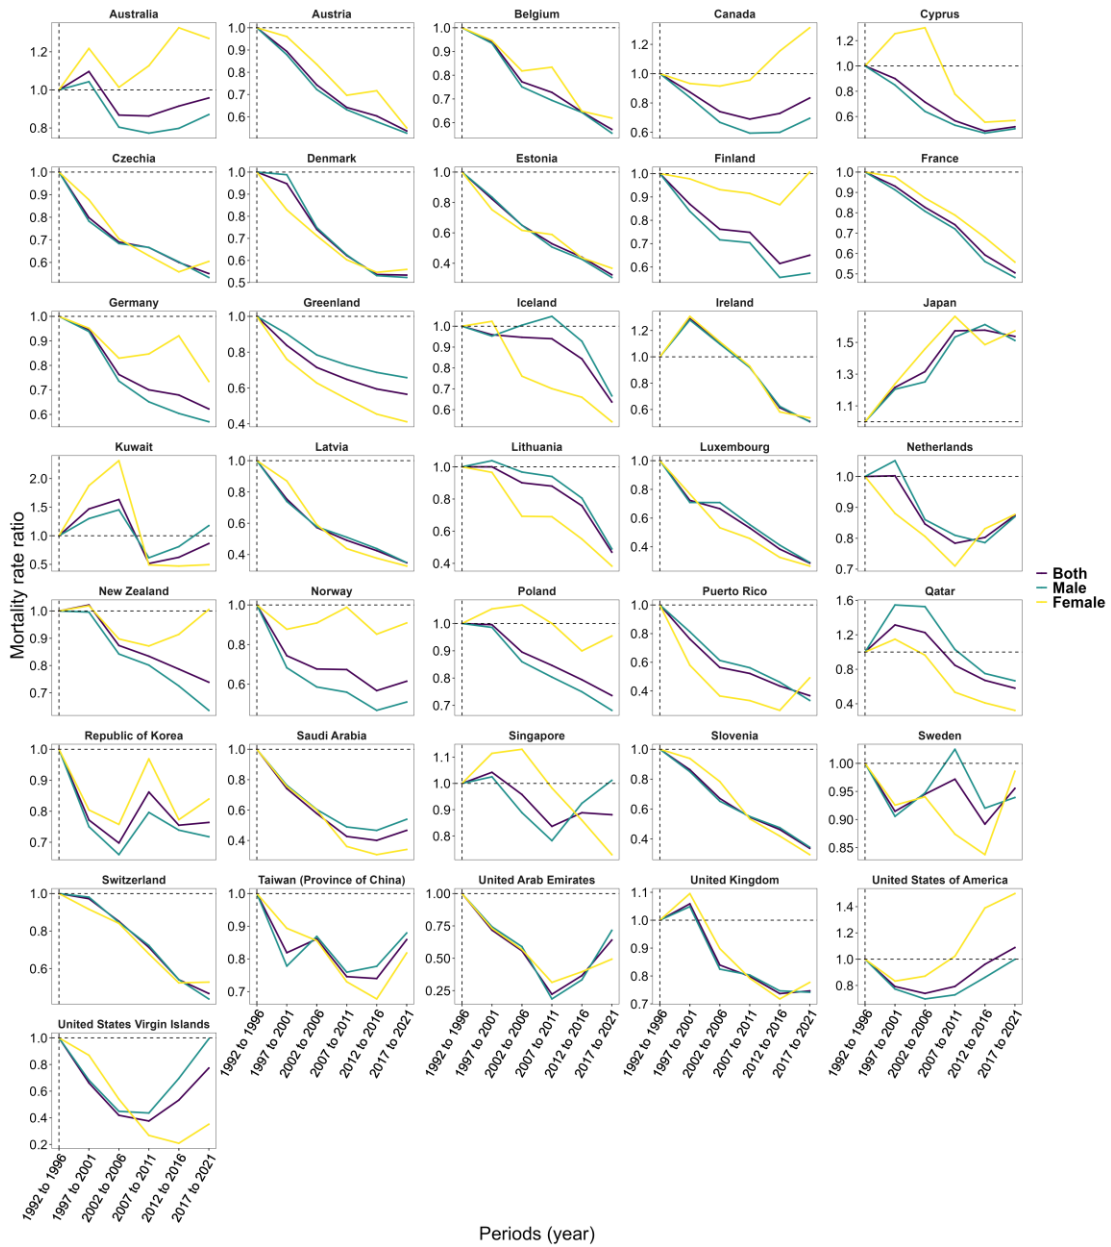

**Figure S37. The period effects of suicide mortality in high SDI countries, 1990-2021**

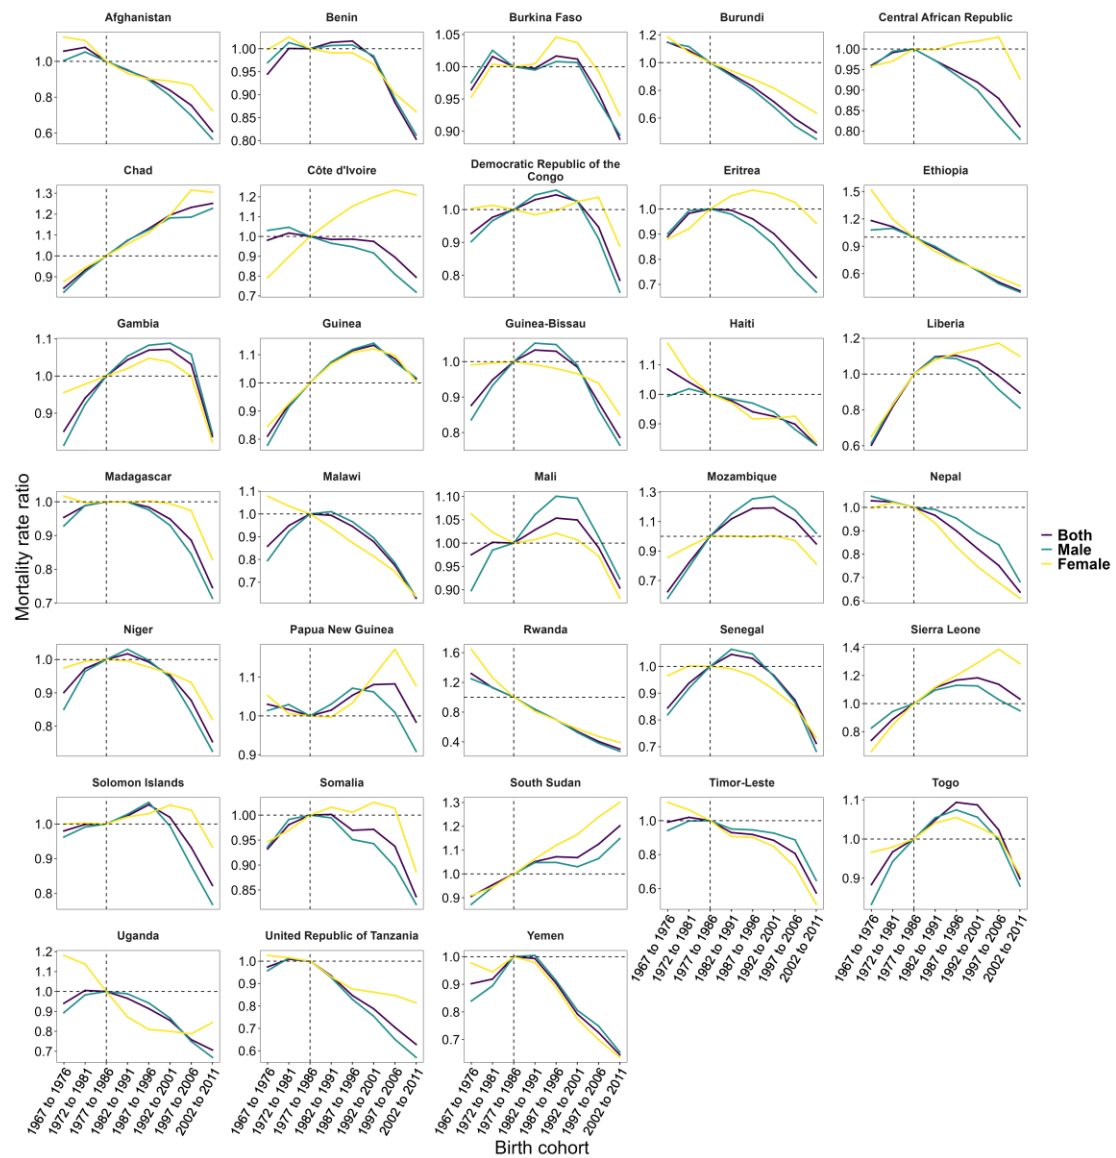

**Figure S38. The cohort effects of suicide mortality in low SDI countries, 1990-2021**



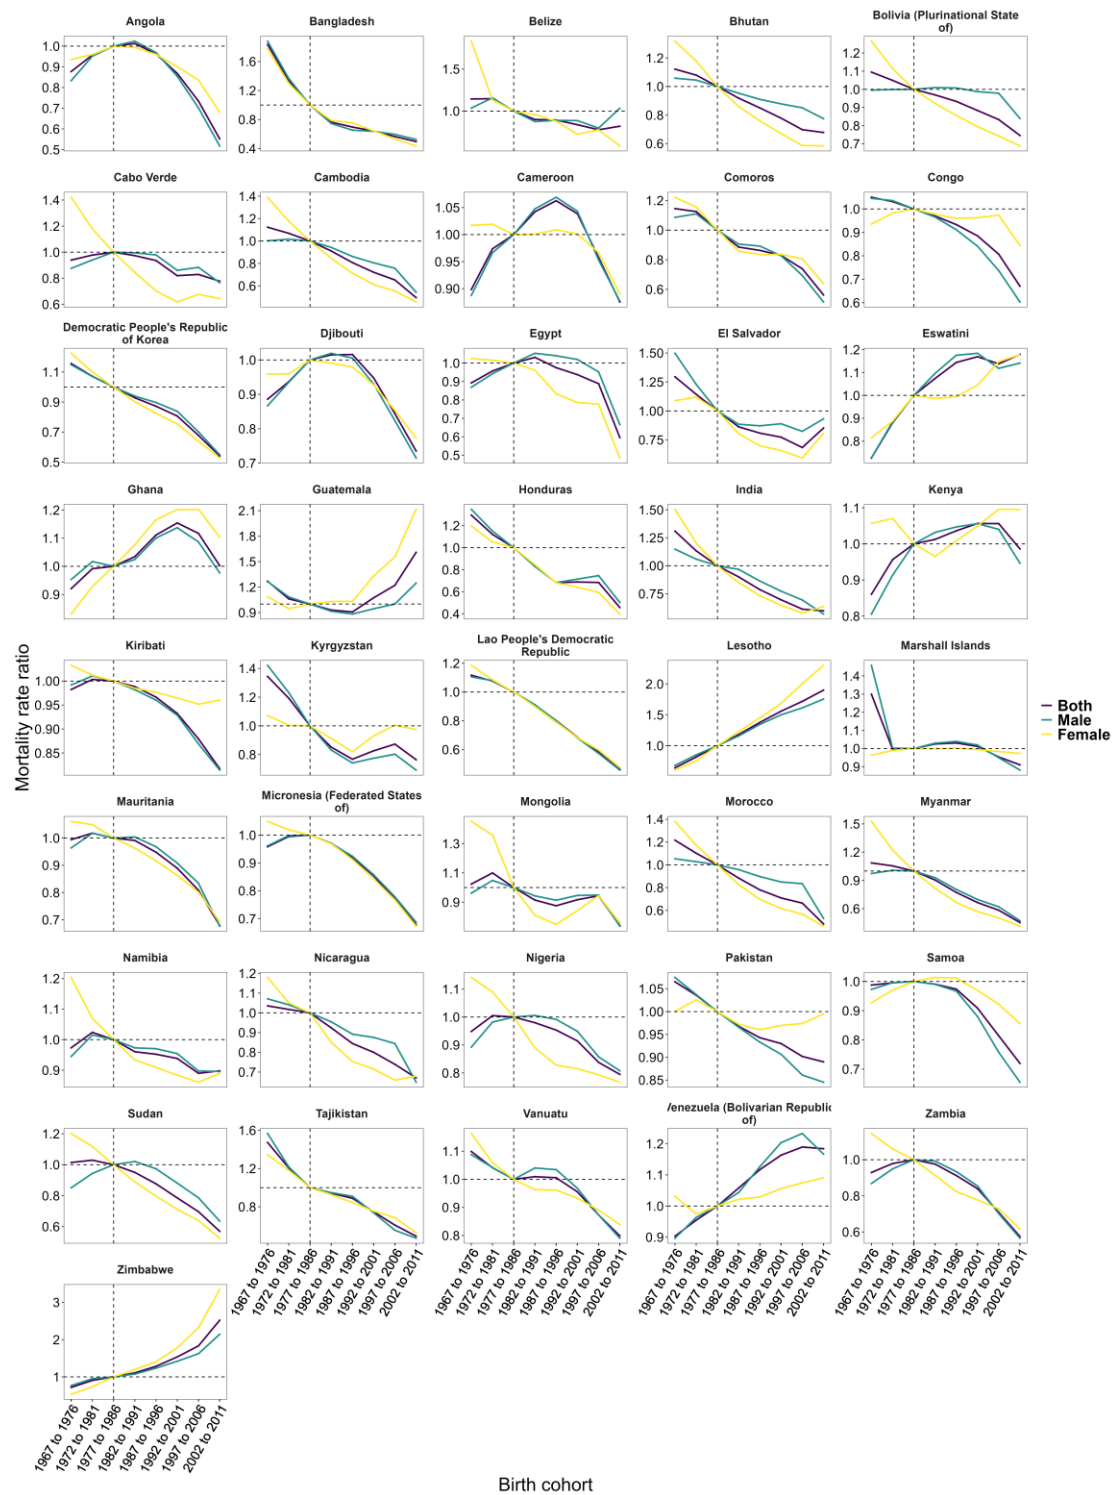

**Figure S39. The cohort effects of suicide mortality in low-middle SDI countries, 1990-2021**



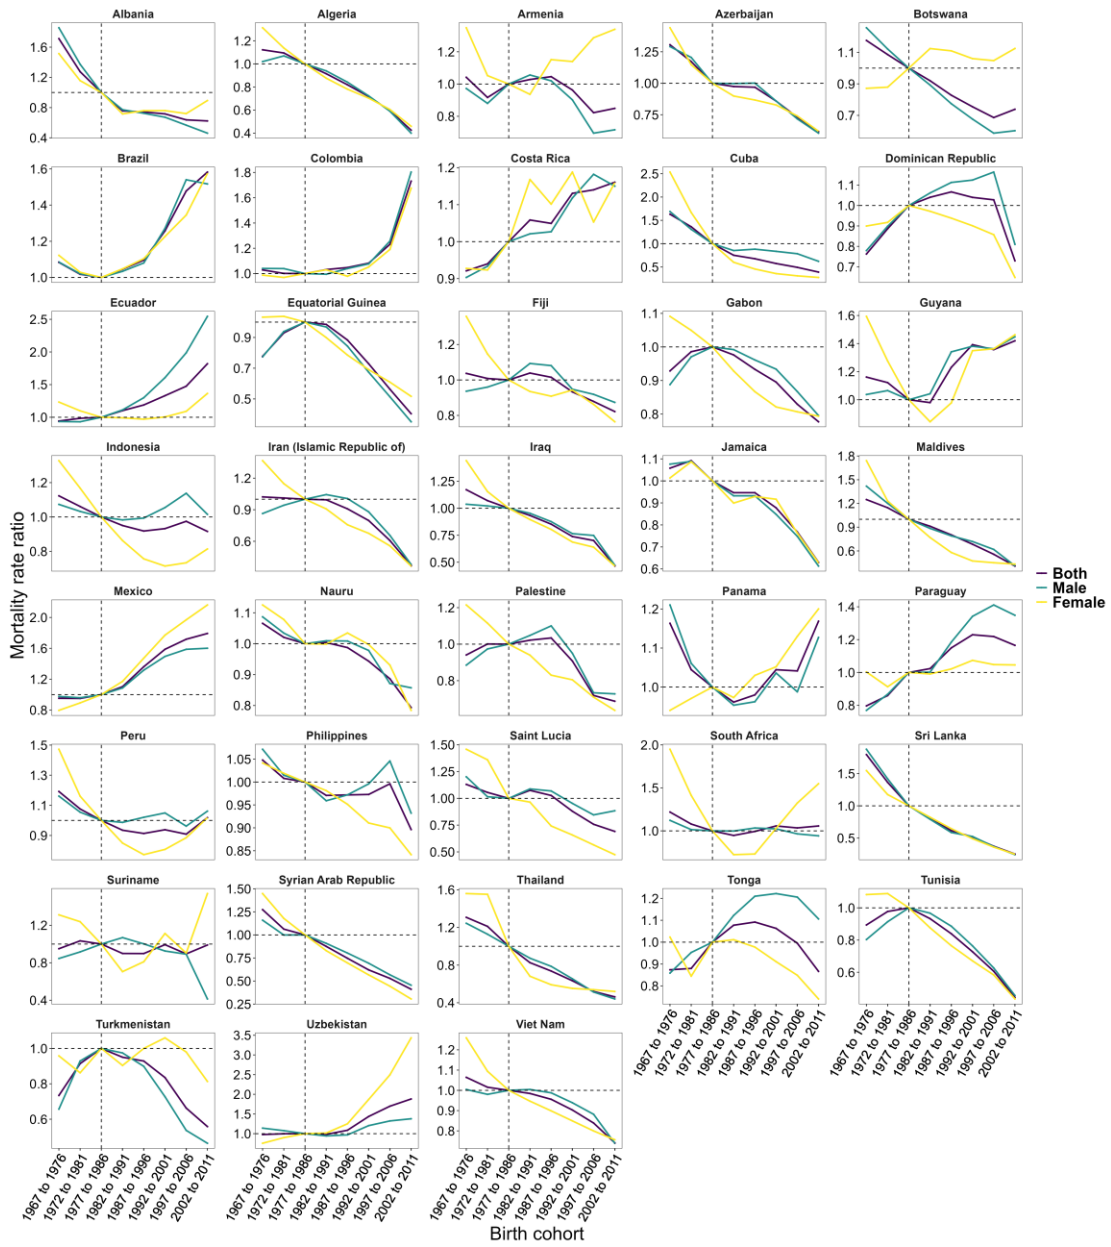

**Figure S40. The cohort effects of suicide mortality in middle SDI countries, 1990-2021**

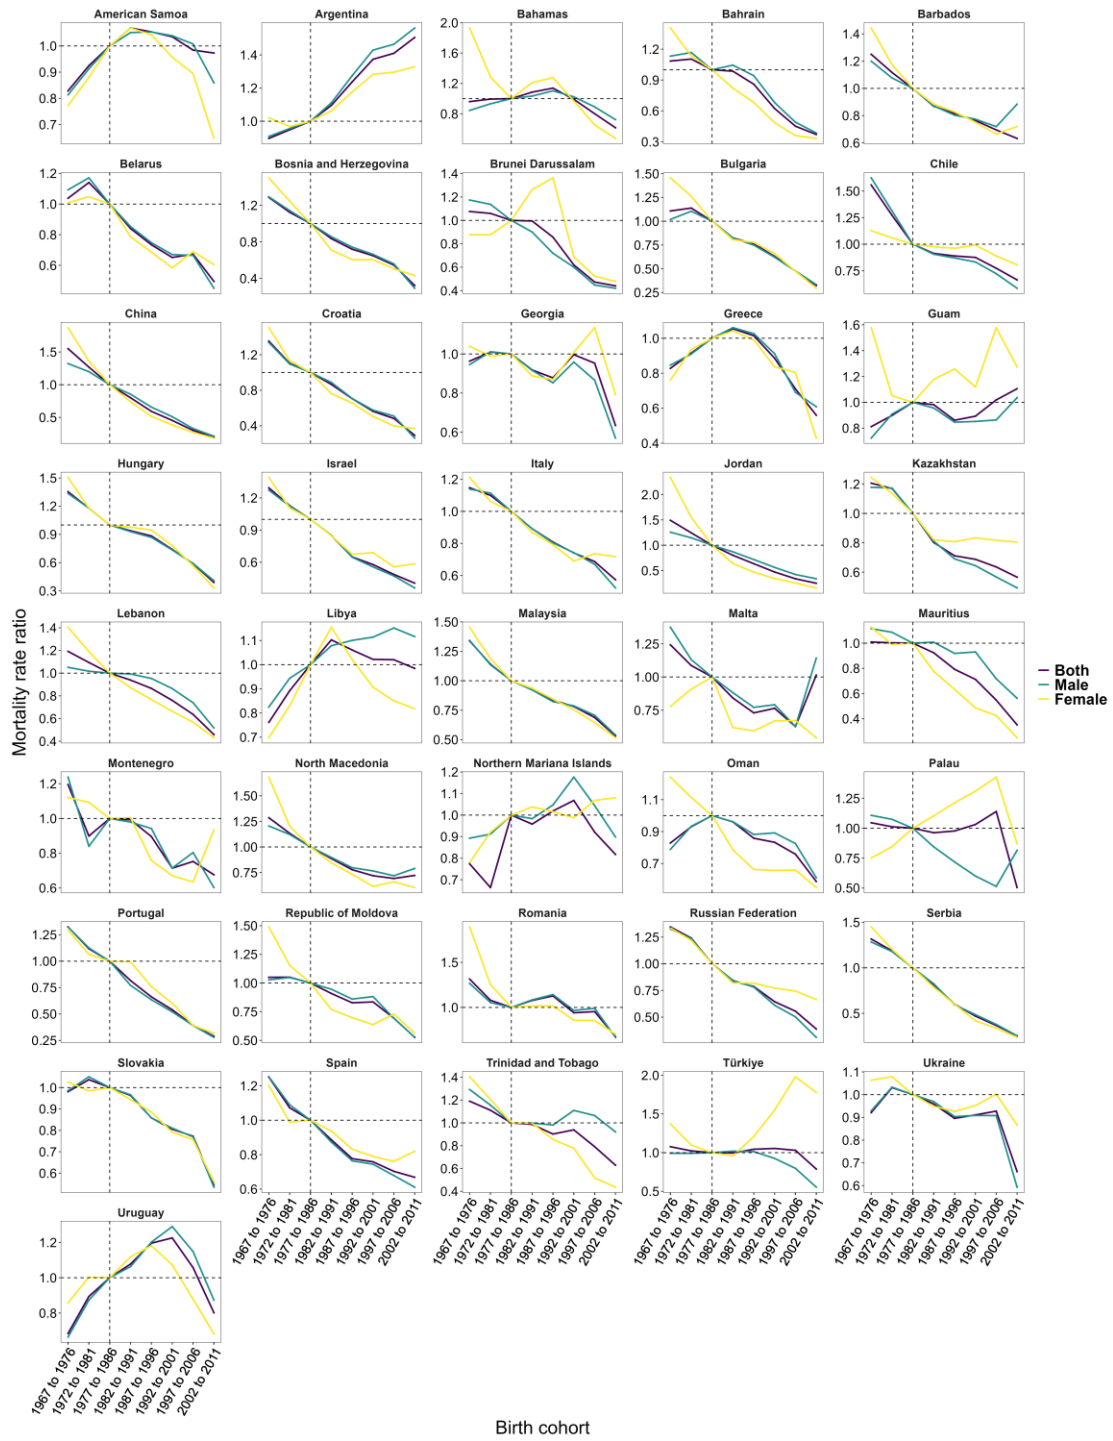

**Figure S41. The cohort effects of suicide mortality in high-middle SDI countries, 1990-2021**

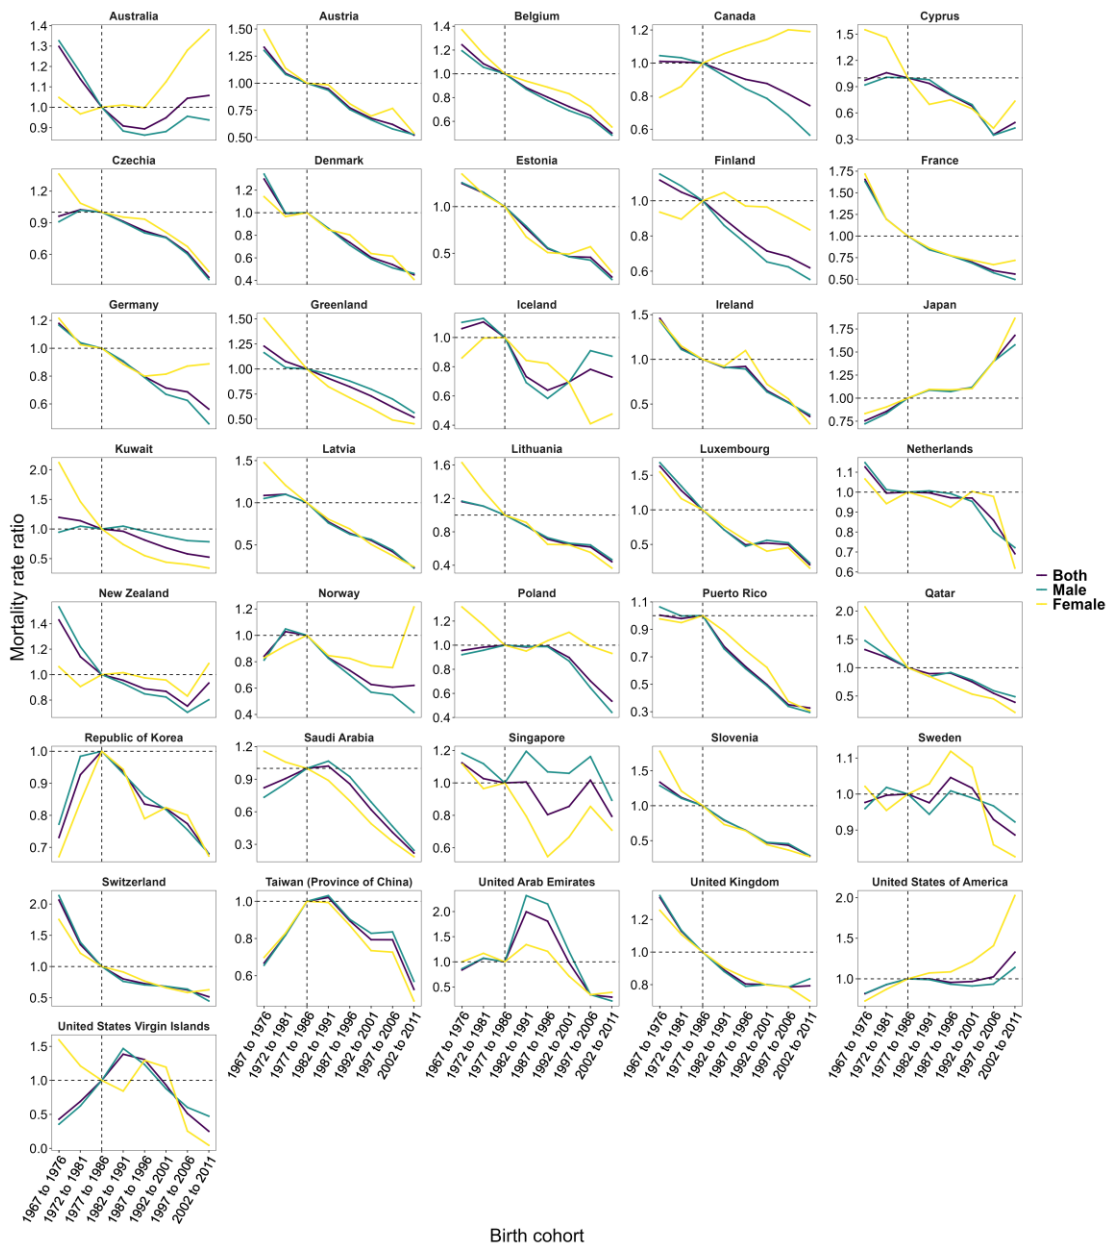

**Figure S42. The cohort effects of suicide mortality in high SDI countries, 1990-2021**
